# Supplementary material
Source: MDPI journal article supplement (https://www.mdpi.com/2073-4433/14/7/1080)
Supplement: s1 [file s1]

## Supplementary Materials:

Ahmad Derikvand <sup>1,†</sup>, Ali Taherkhani <sup>1,†</sup>, Mohammad Sadegh Hassanvand <sup>1,2</sup>, Kazem Naddafi <sup>1,2</sup>, Ramin Nabizadeh <sup>1,2</sup>, Mansour Shamsipour <sup>2,3</sup>, Sadegh Niazi <sup>4</sup>, Mohsen Heidari <sup>5</sup>, Adel Mokammel <sup>1,\*</sup> and Sasan Faridi <sup>1,2,\*</sup>

Limit of Detection (LOD) and limit of quantification (LOQ) were calculated using laboratory blanks. Greater than three times signal to noise ratio ( $S/N = 3$ ) was determined in blanks chromatogram for each compound.

**Table S1.** LOD, LOQ and recovery efficiency values.

| Chemical compound | Recovery efficiency (%) | LOD ( $\mu\text{g/L}$ ) | LOQ ( $\mu\text{g/L}$ ) |
|-------------------|-------------------------|-------------------------|-------------------------|
| Benzene           | 95                      | 5                       | 15                      |
| Toluene           | 95                      | 7                       | 21                      |
| Ethylbenzene      | 97                      | 5                       | 15                      |
| Xylenes           | 96                      | 3                       | 9                       |

This document includes probability distributions of BTEX compounds' cancer and non-cancer risk in the public environments.

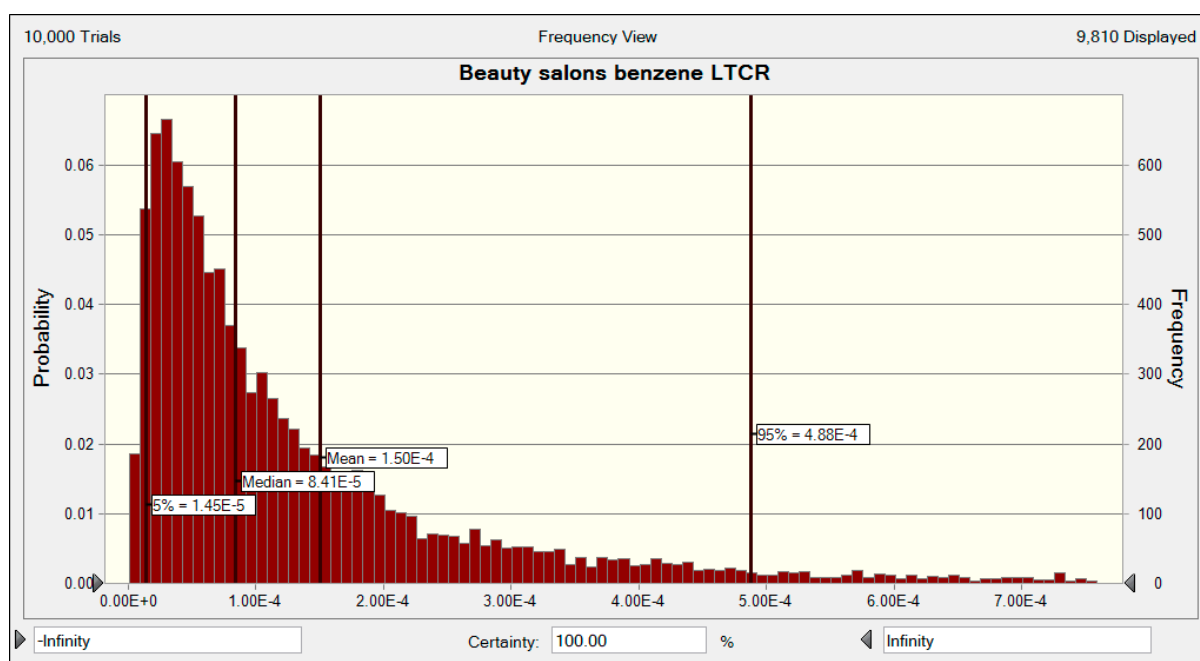

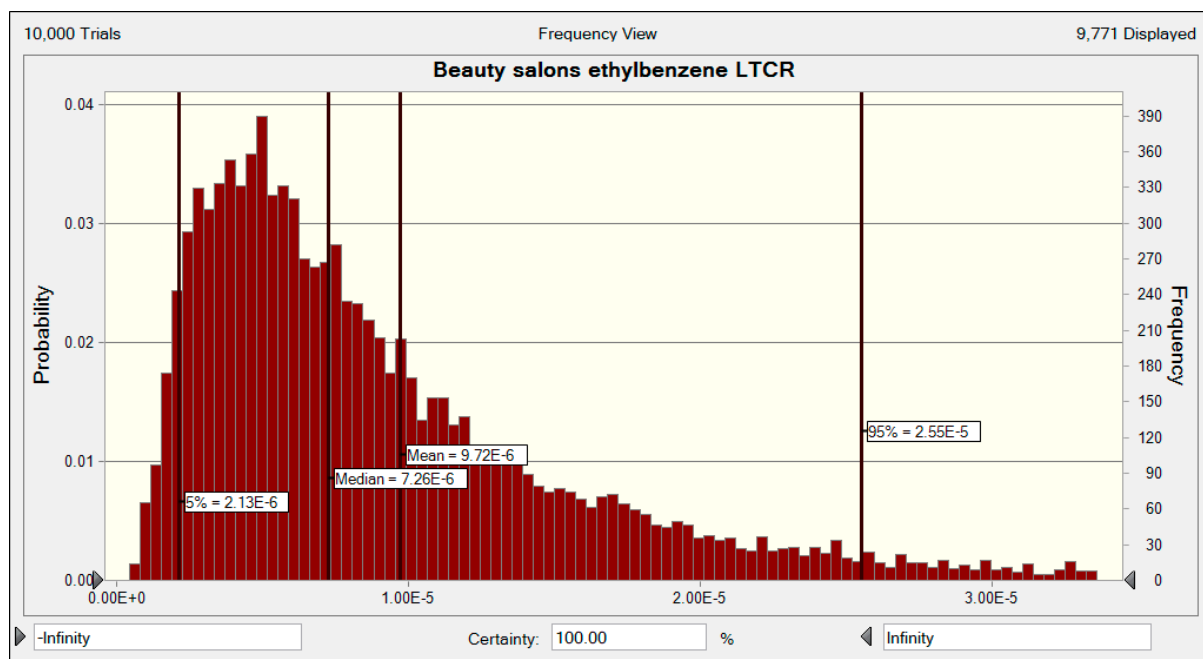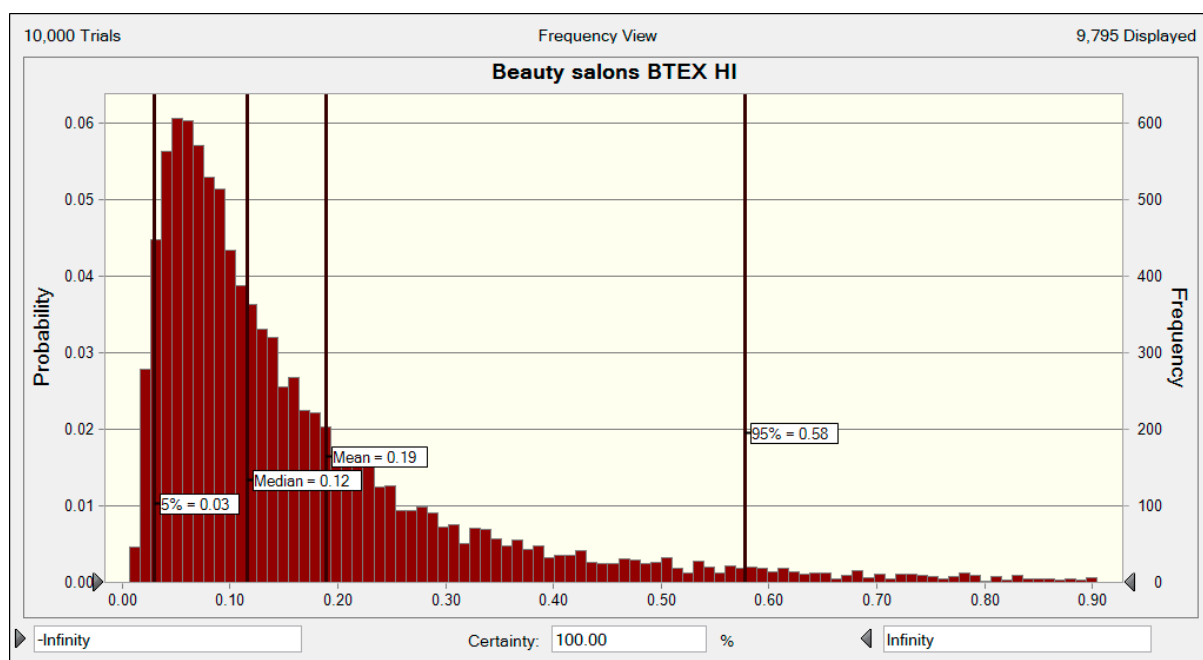

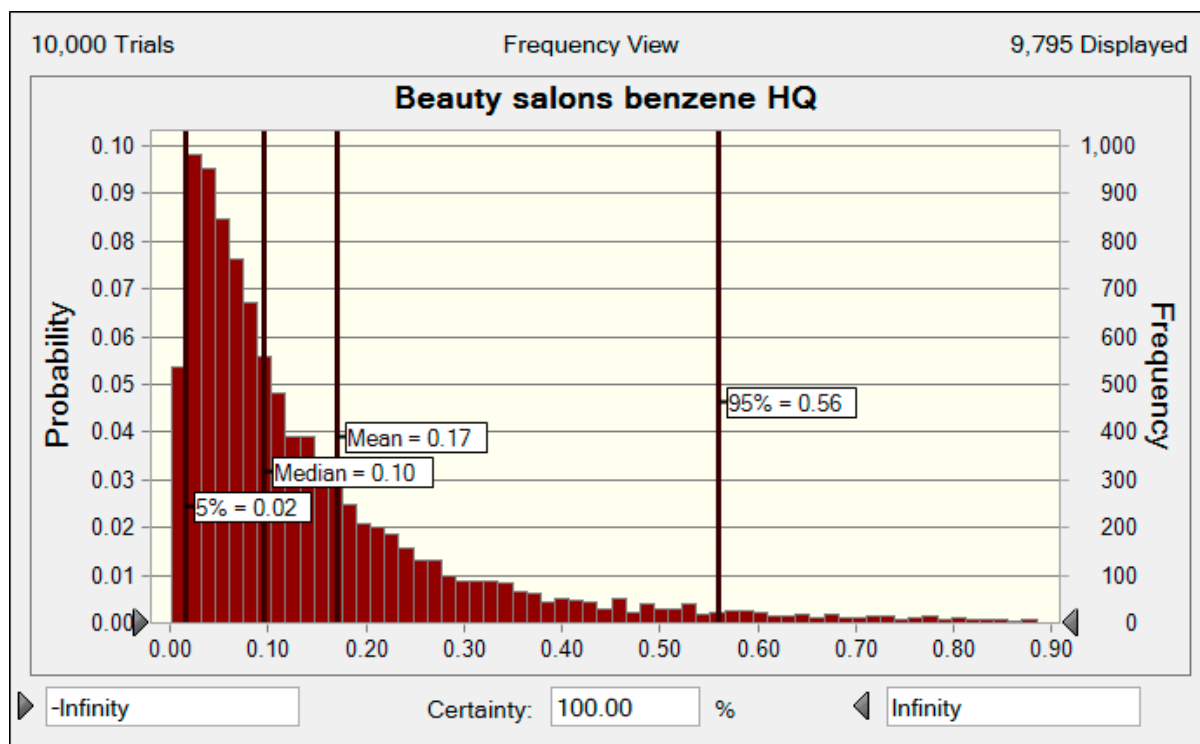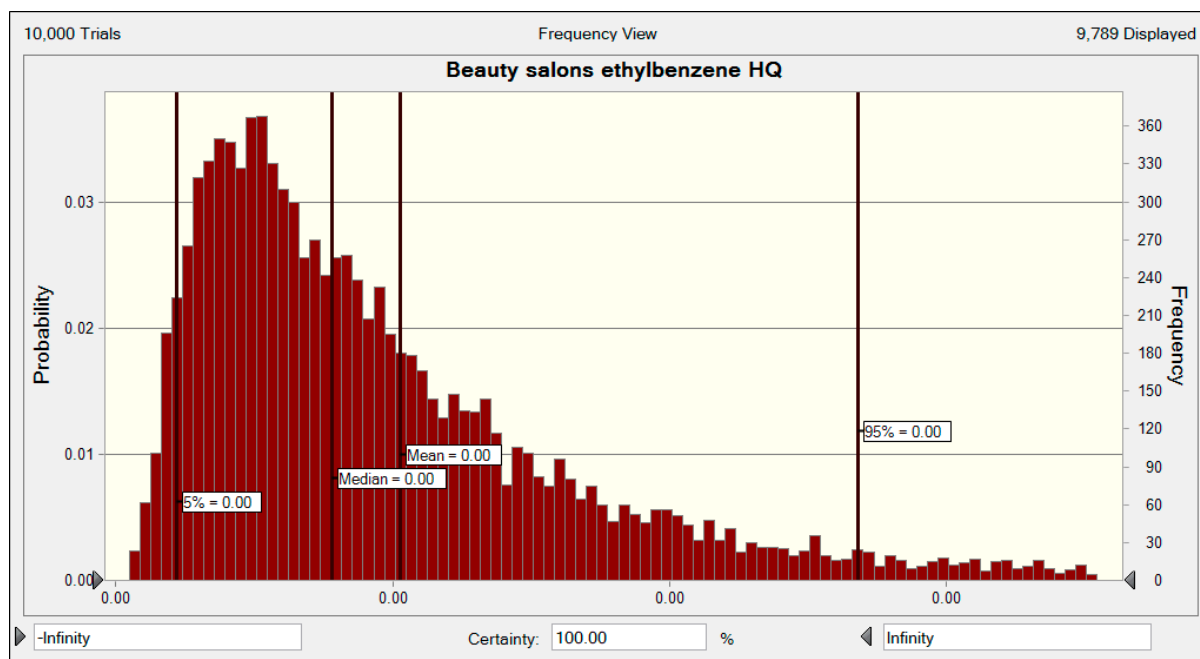

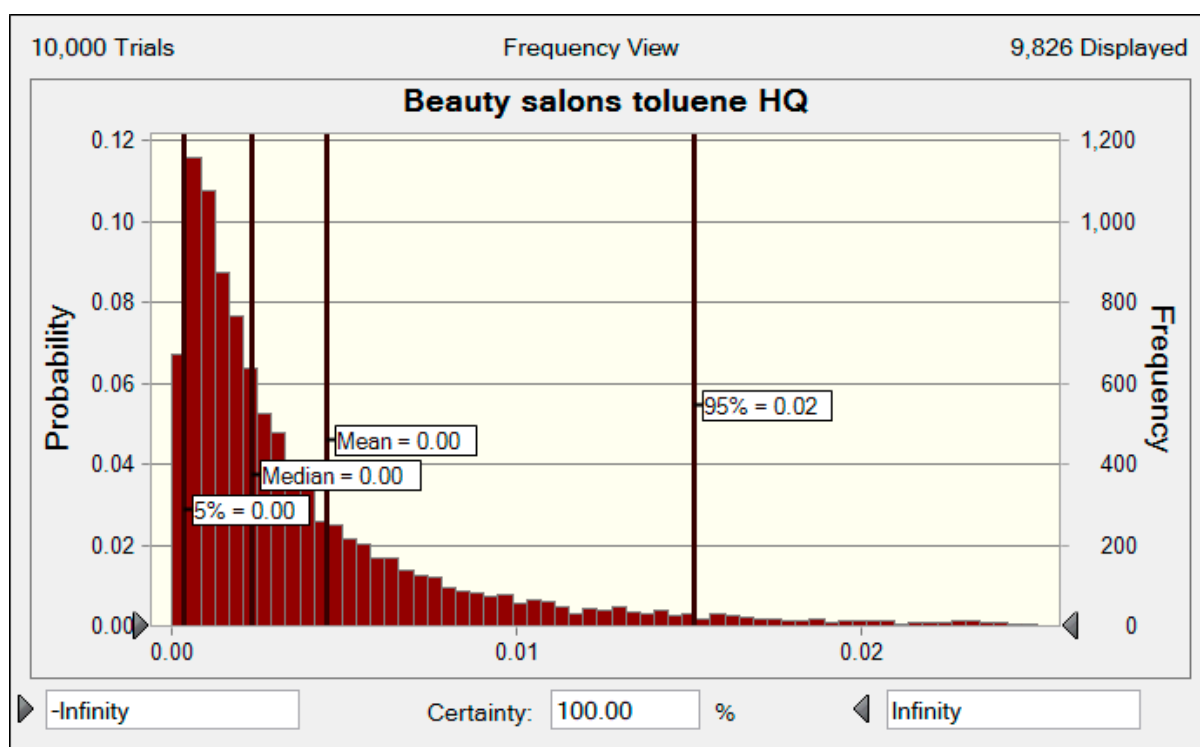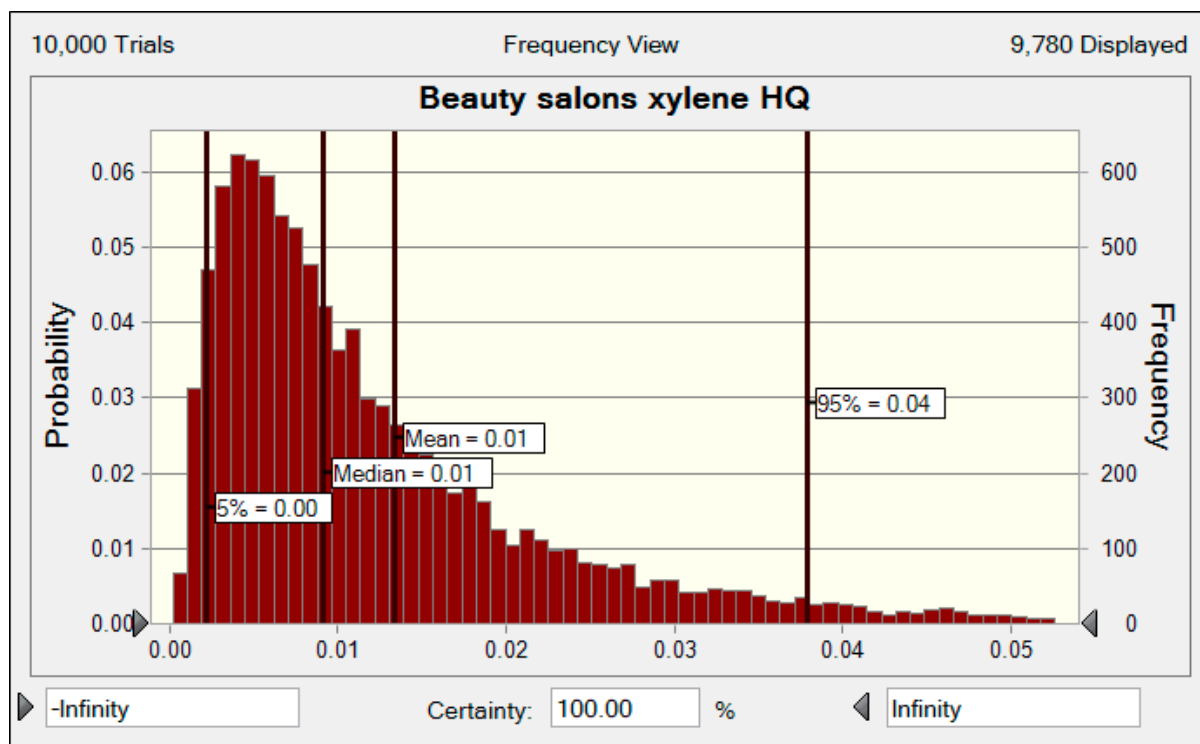

Figure S1. Probability distributions of BTEX cancer and non-cancer risk in beauty salons.

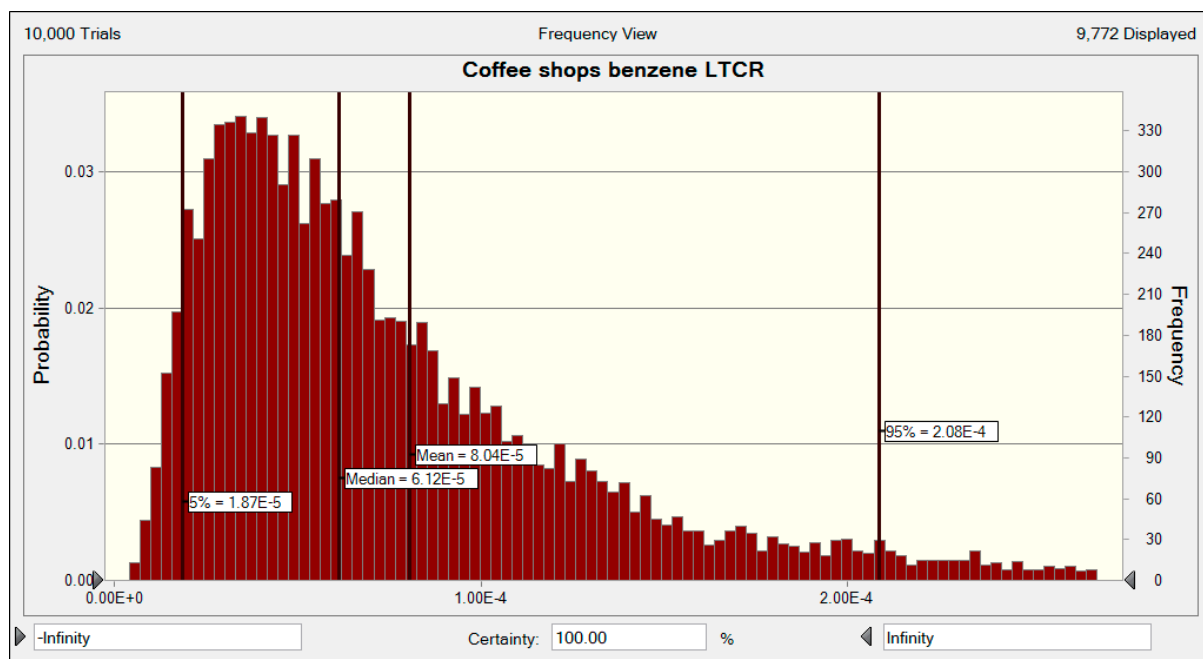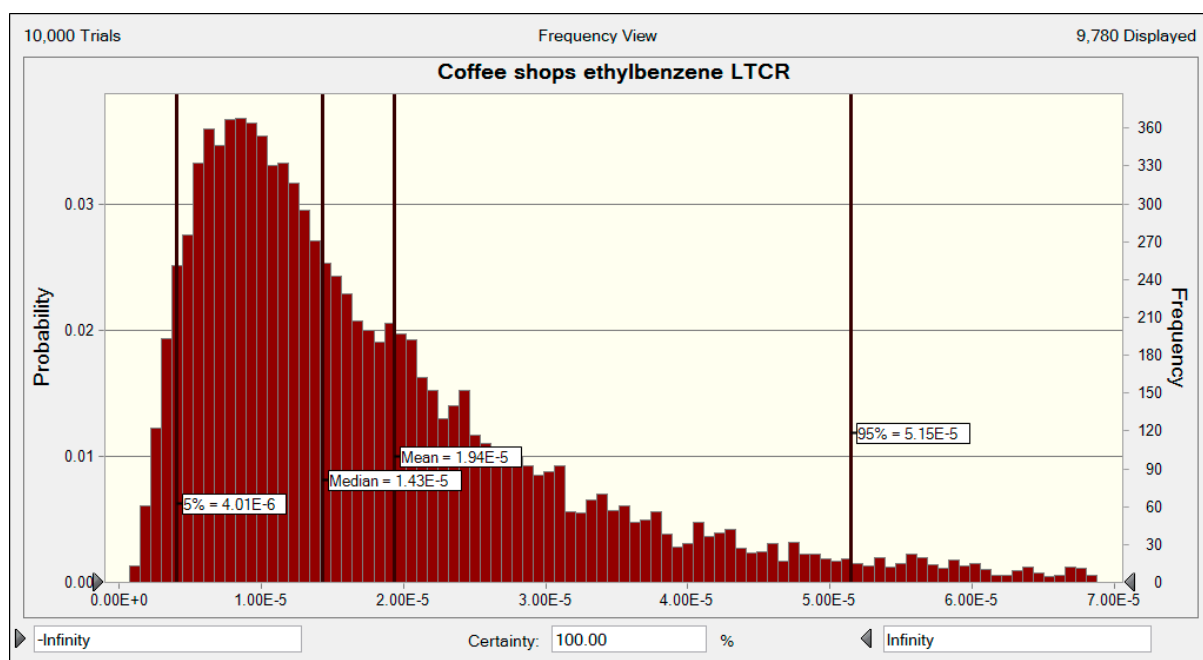

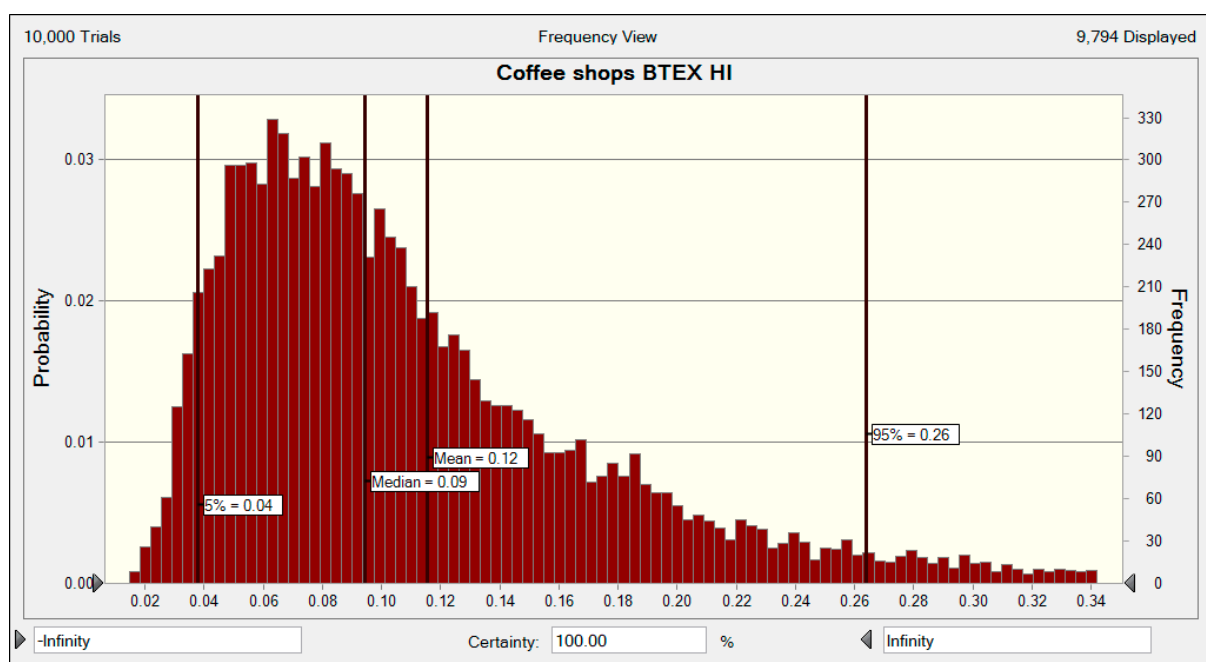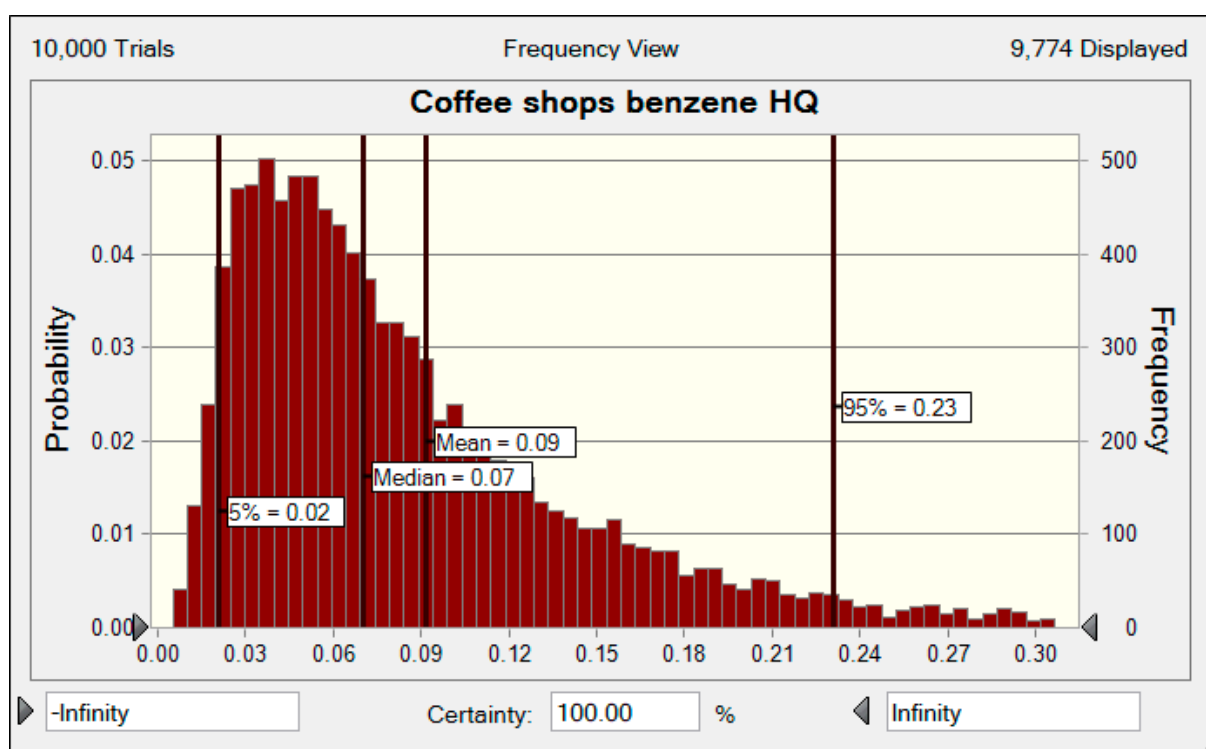

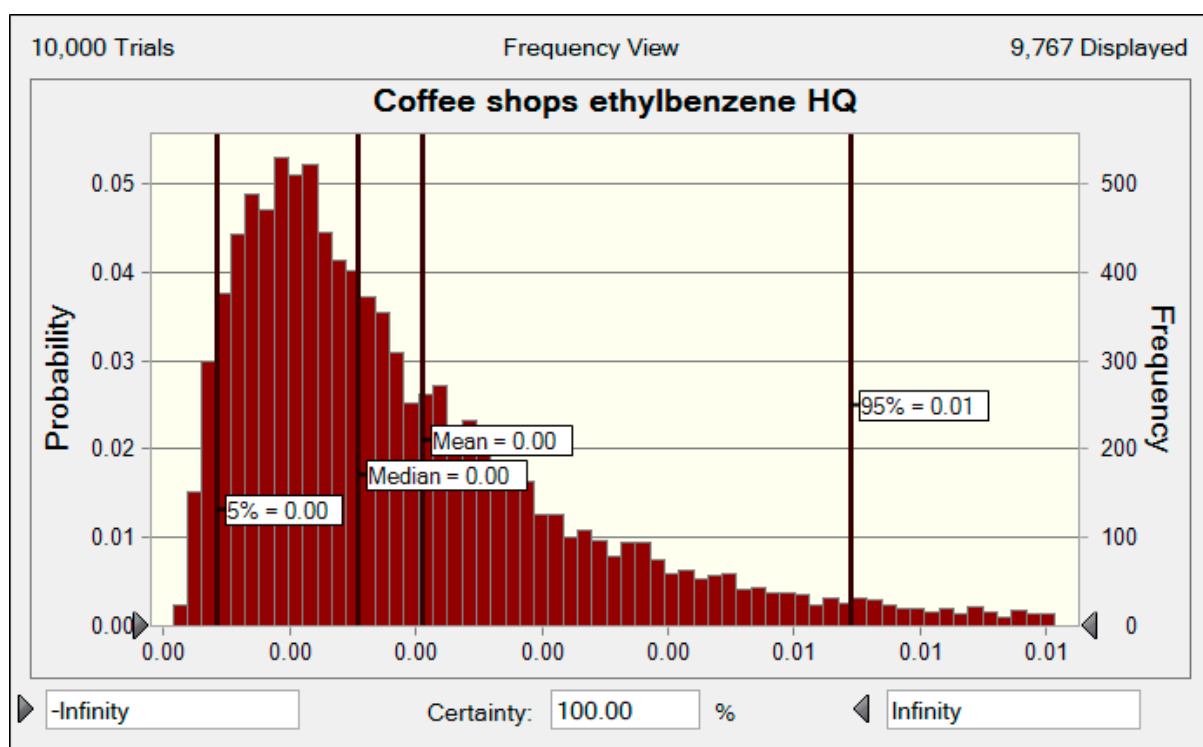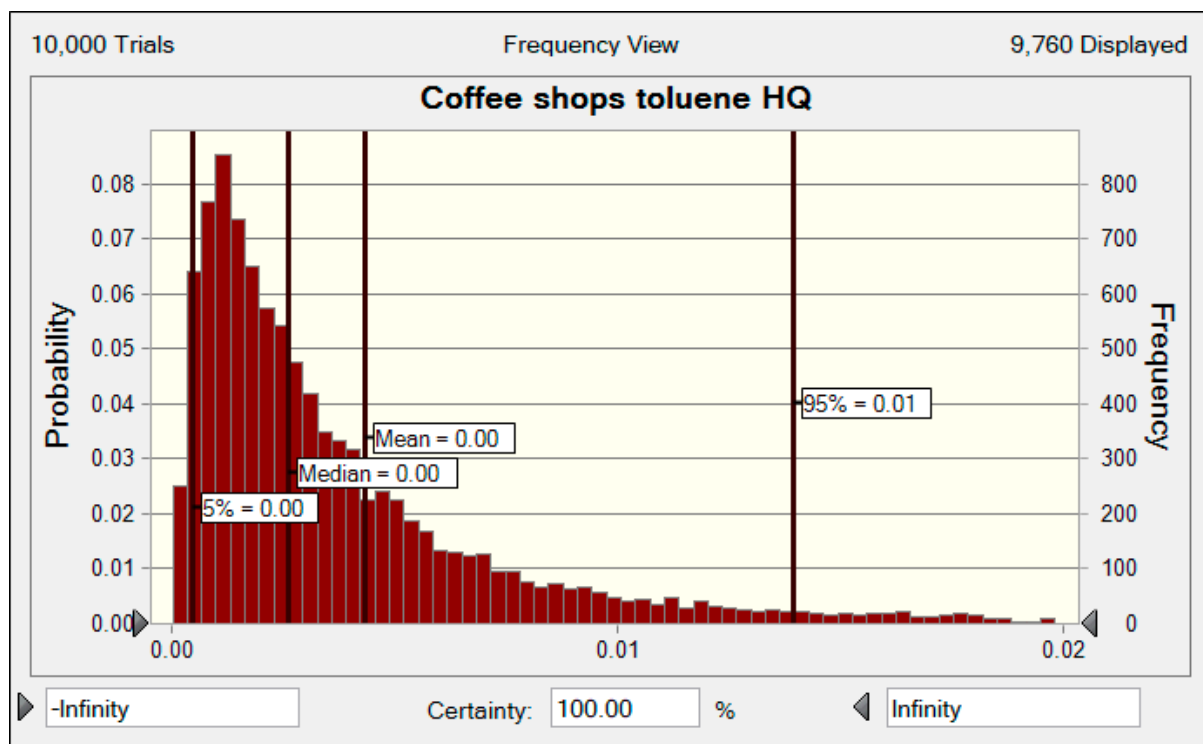

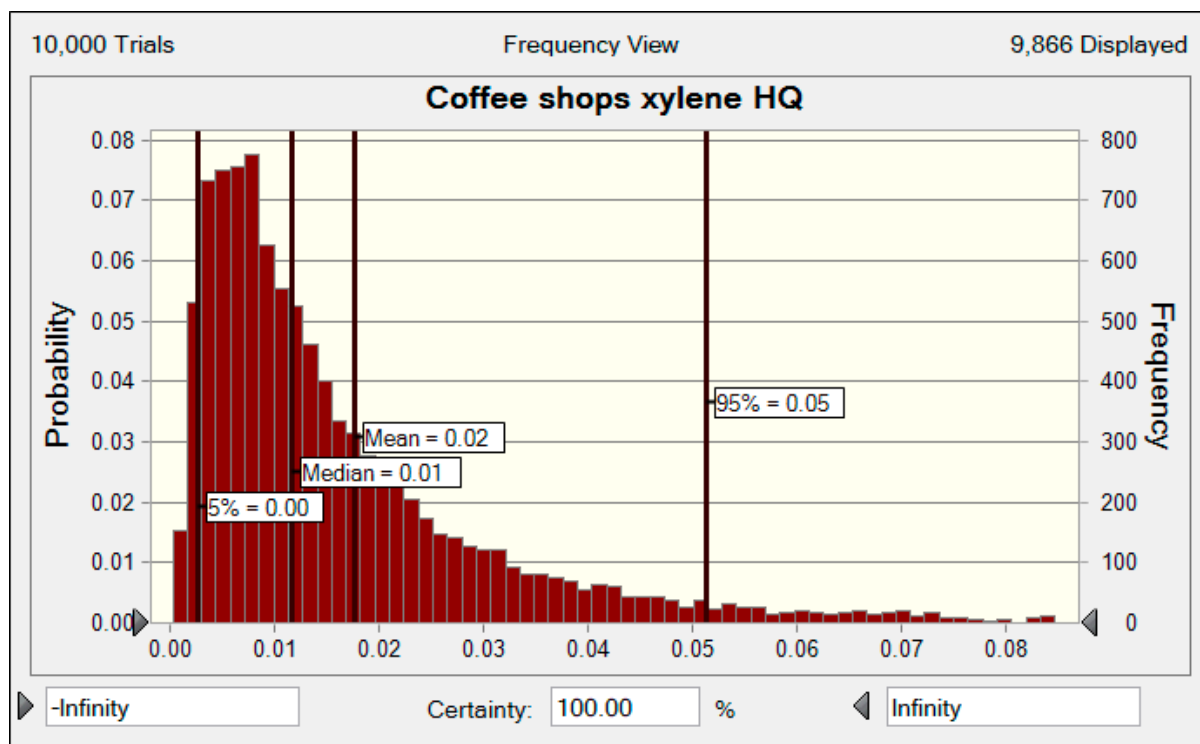

Figure S2. Probability distributions of BTEX cancer and non-cancer risk in coffe shops.

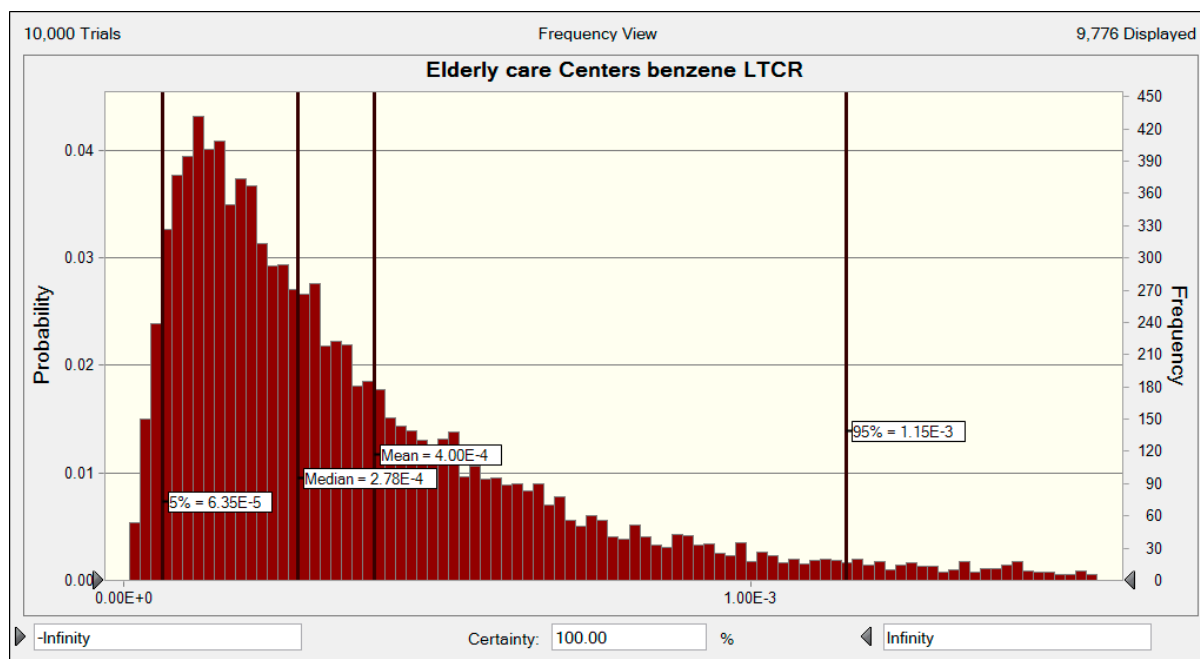



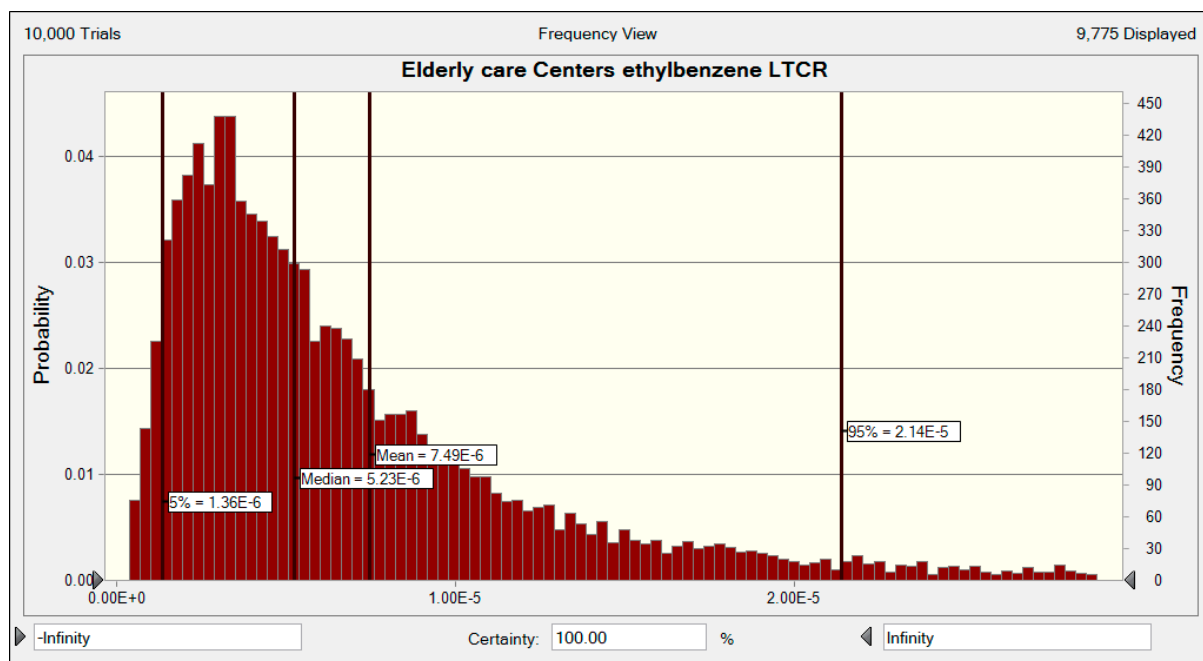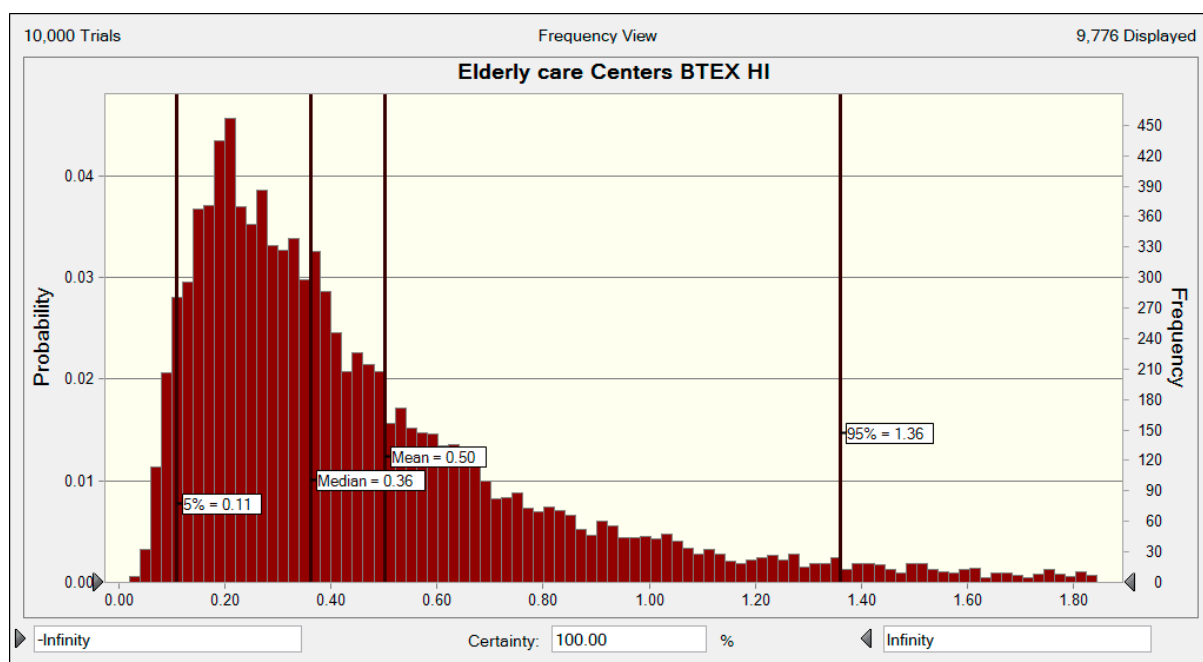

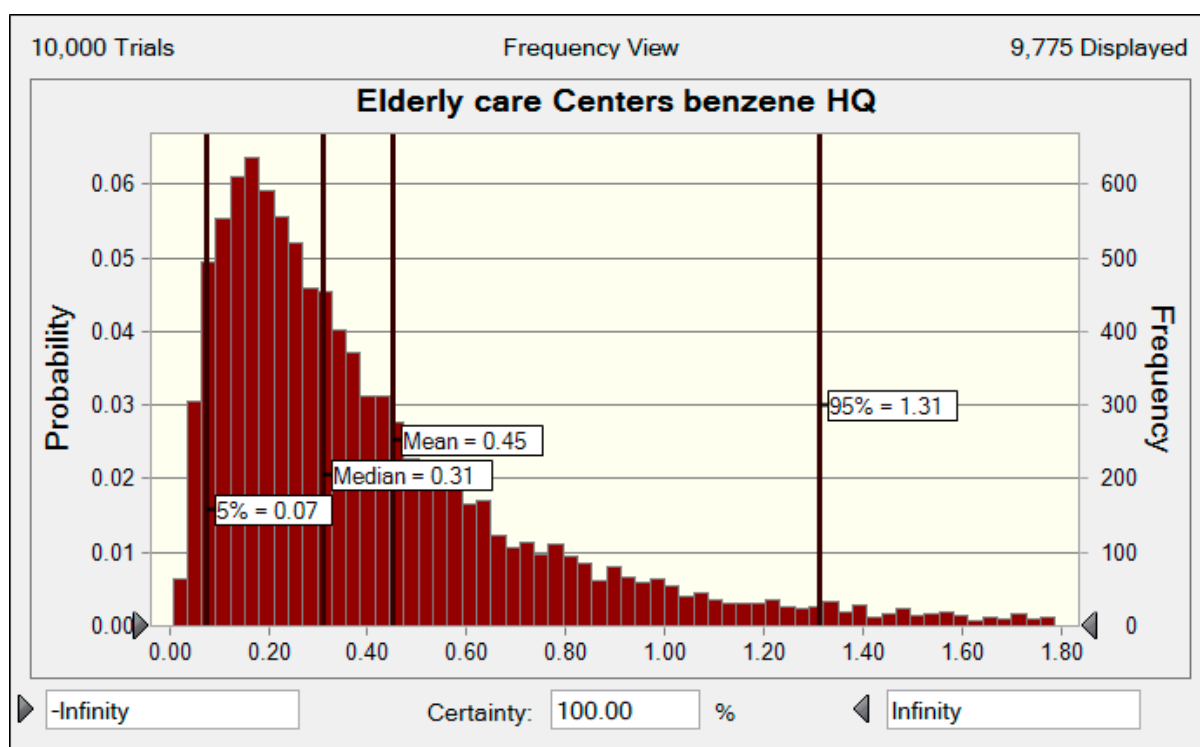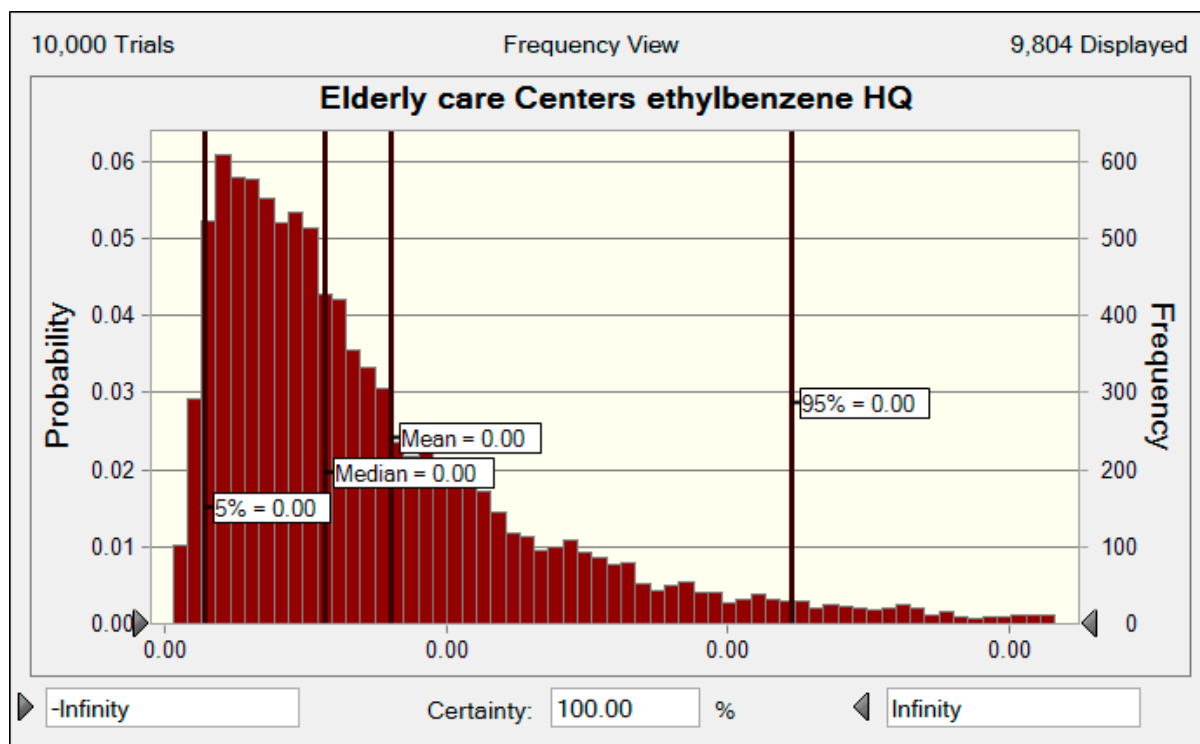

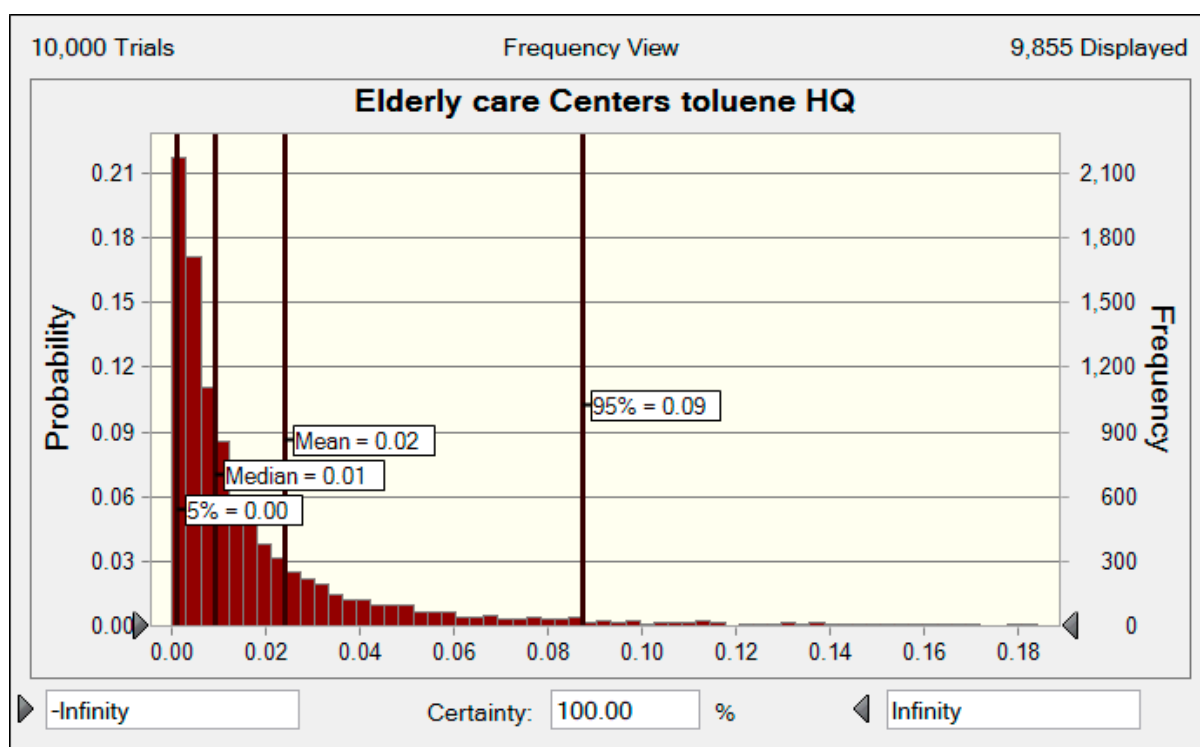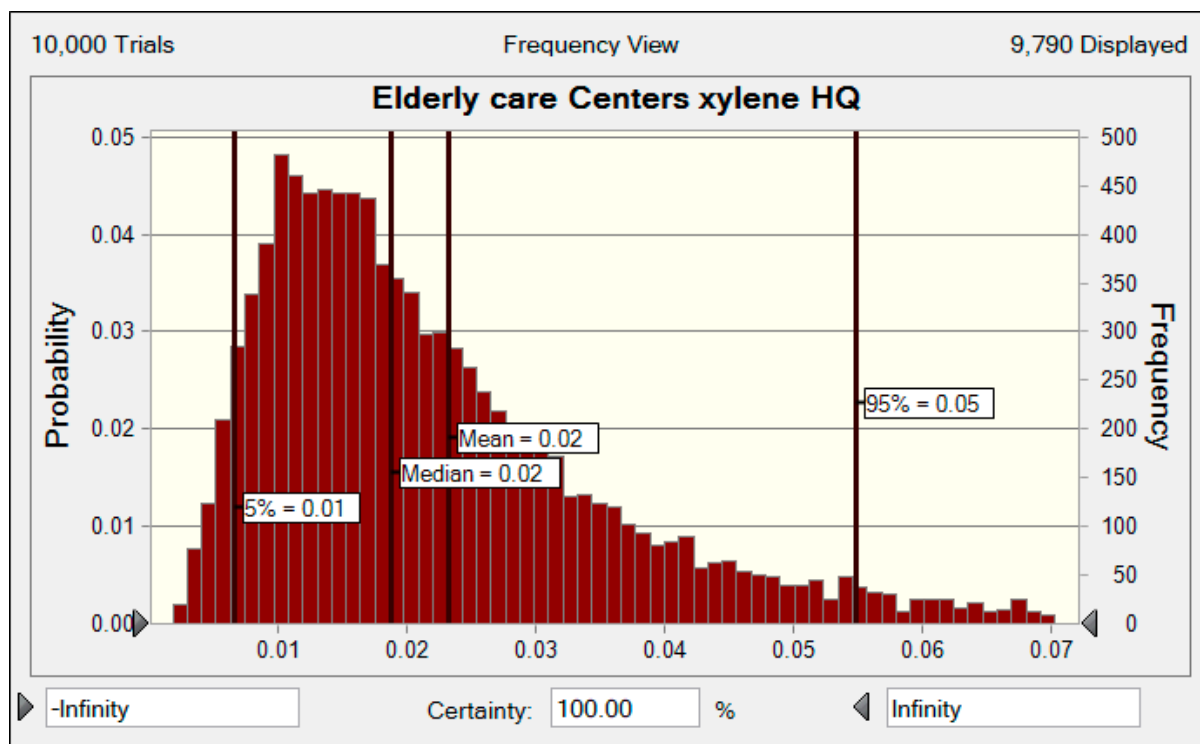

Figure S3. Probability distributions of BTEX cancer and non-cancer risk in elderly care centers.

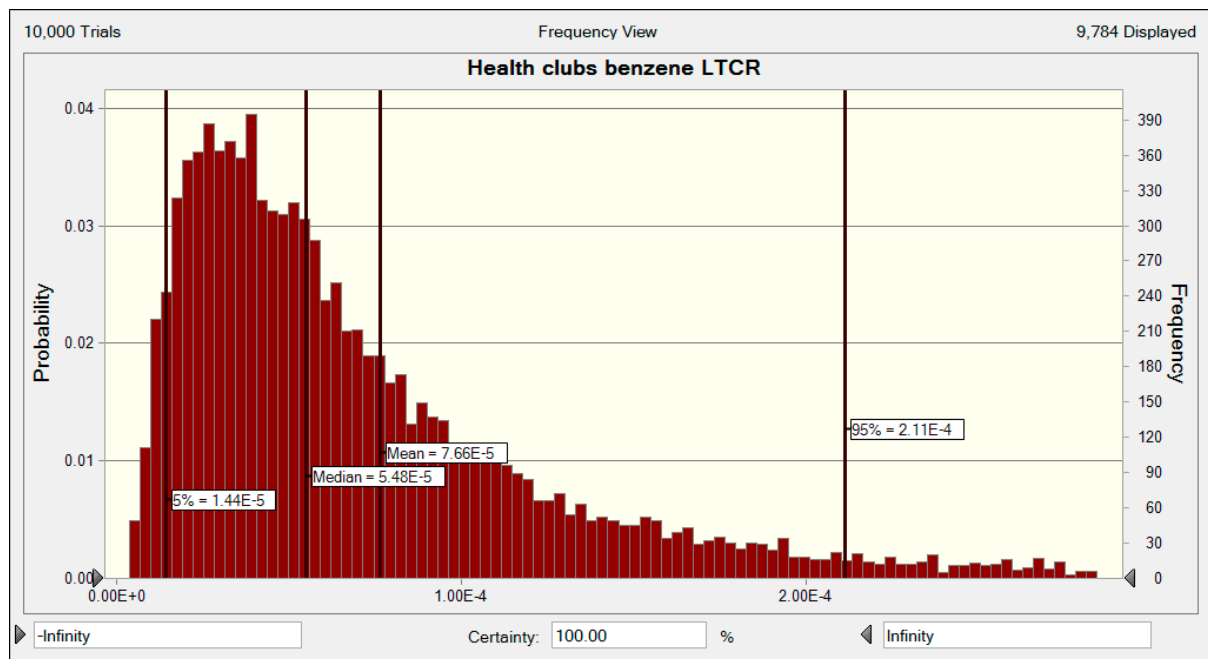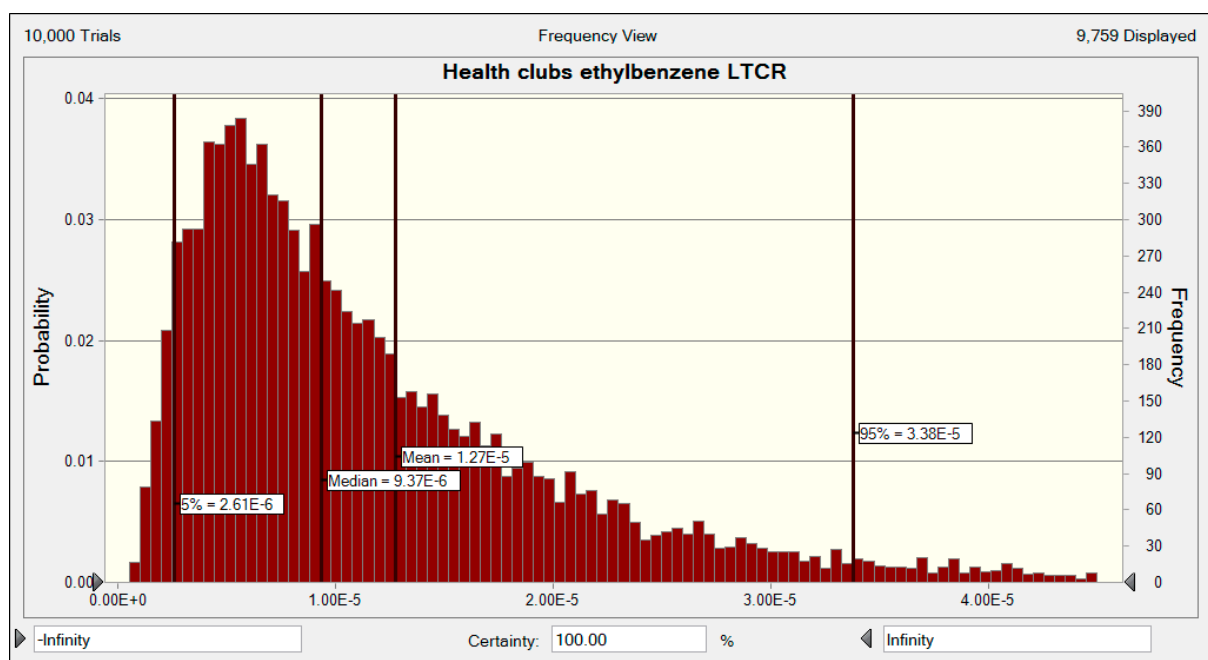

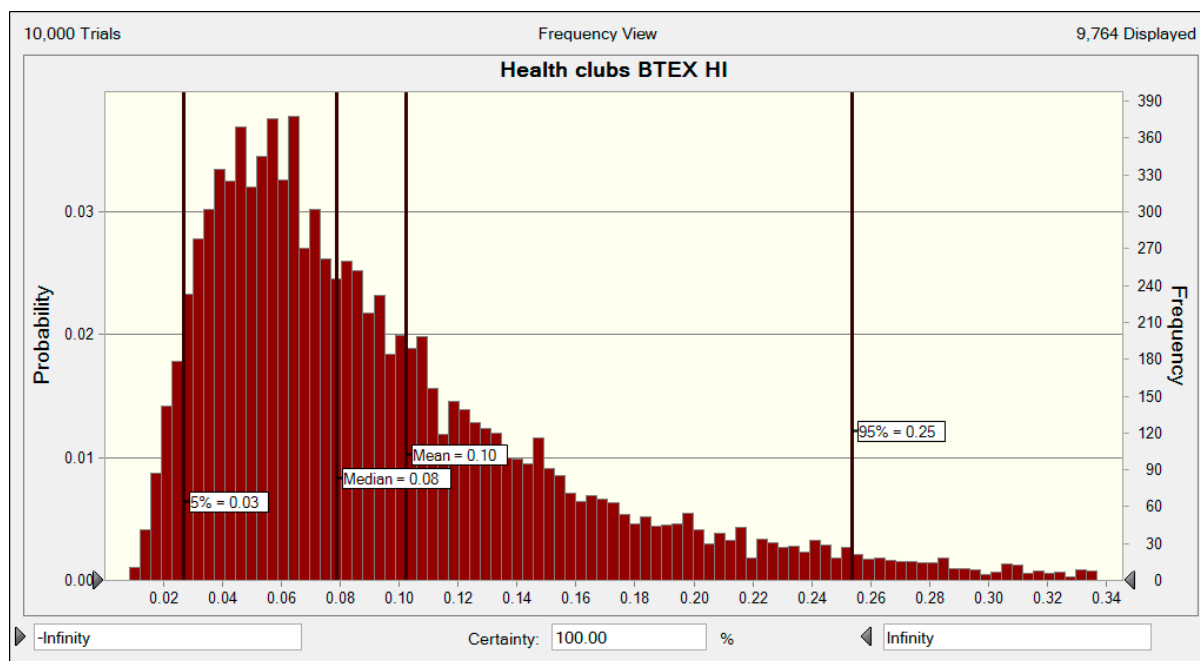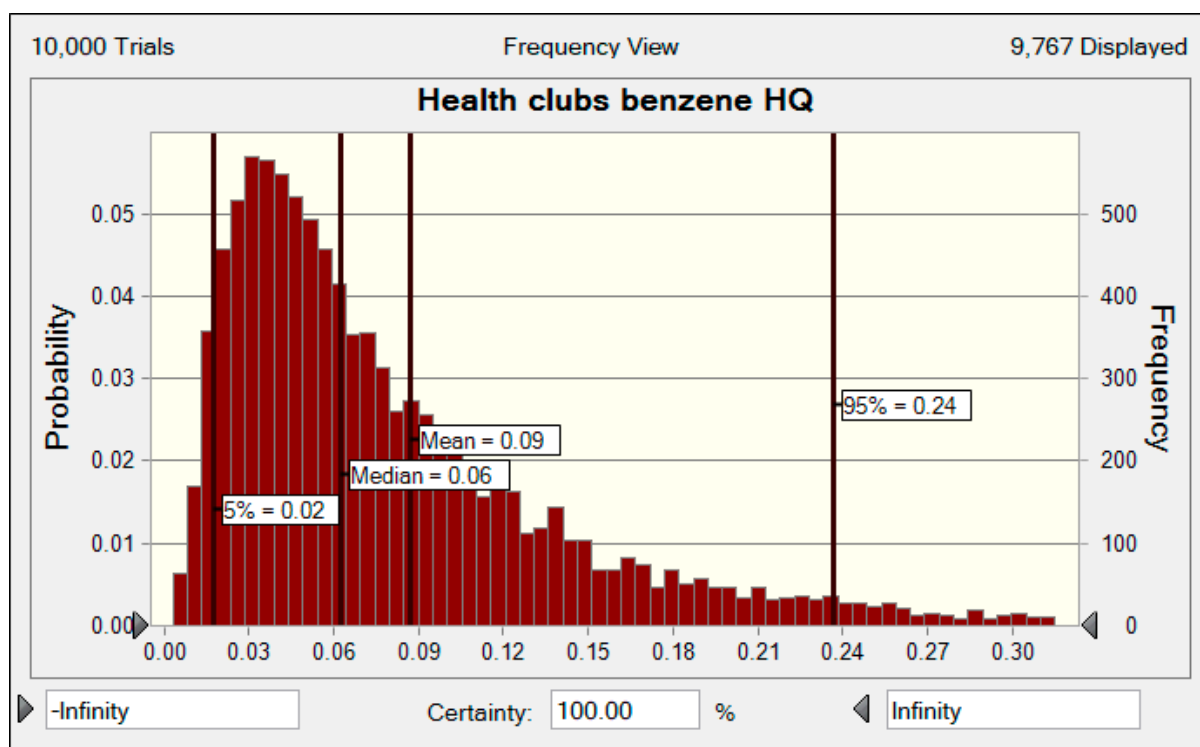

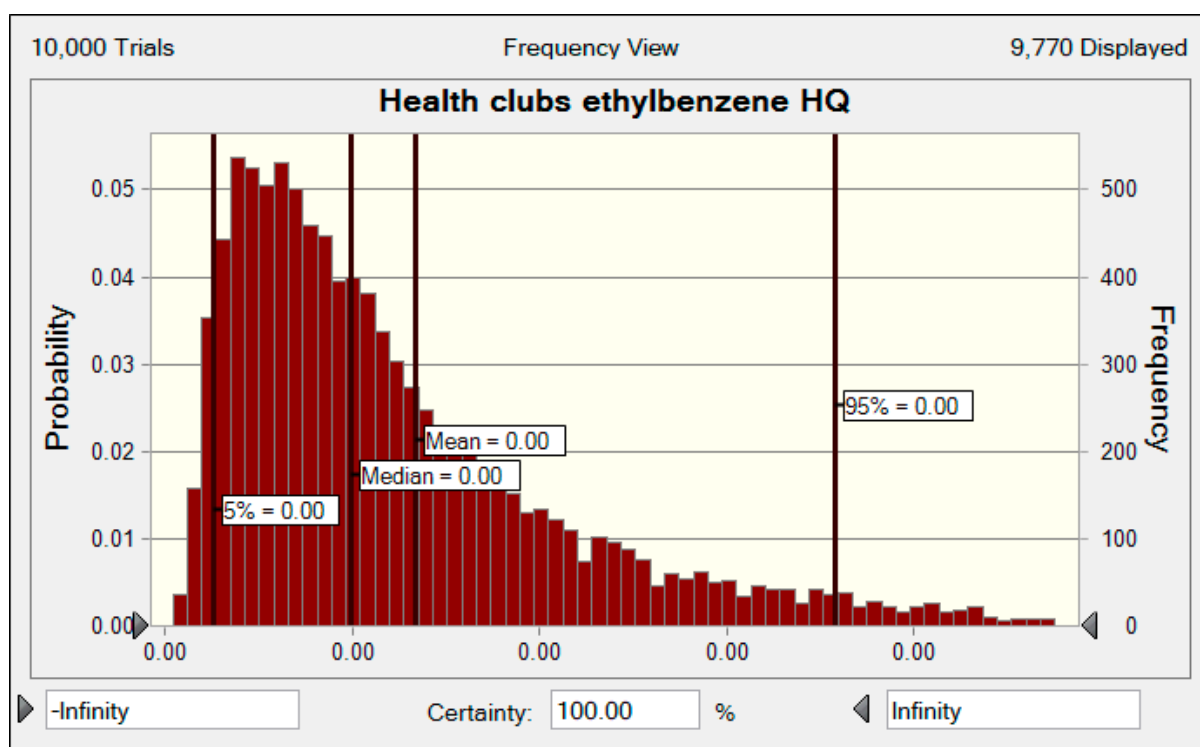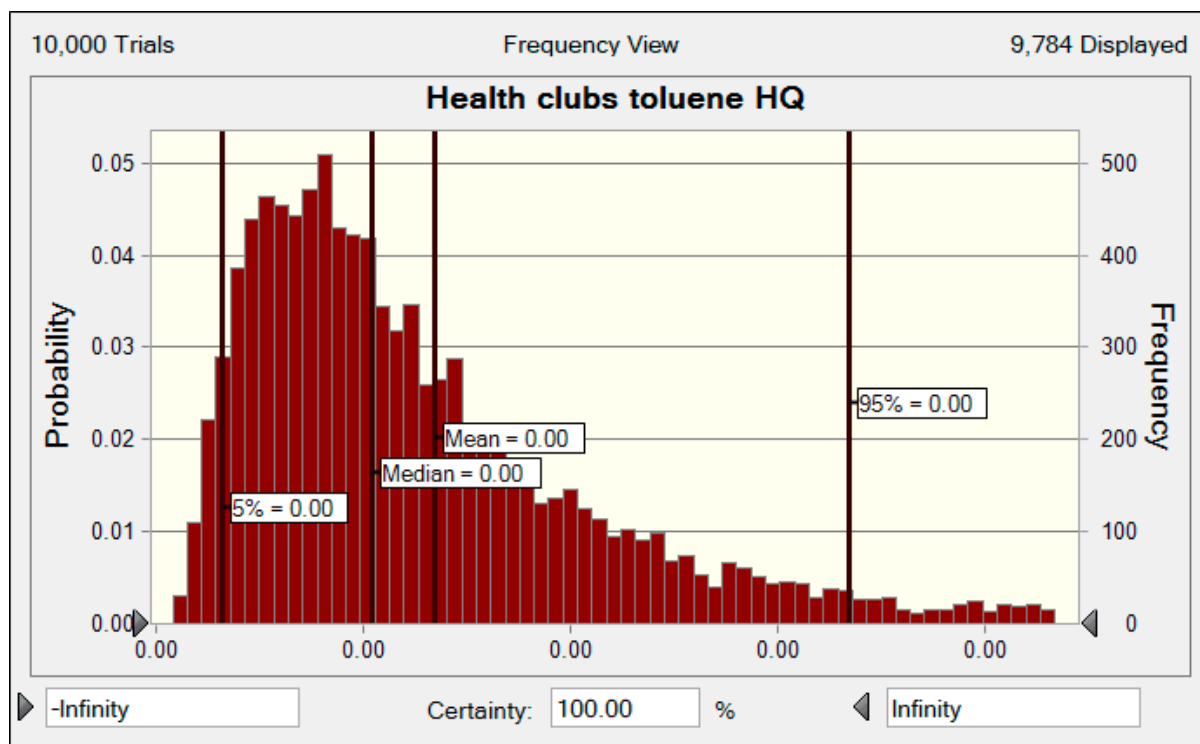

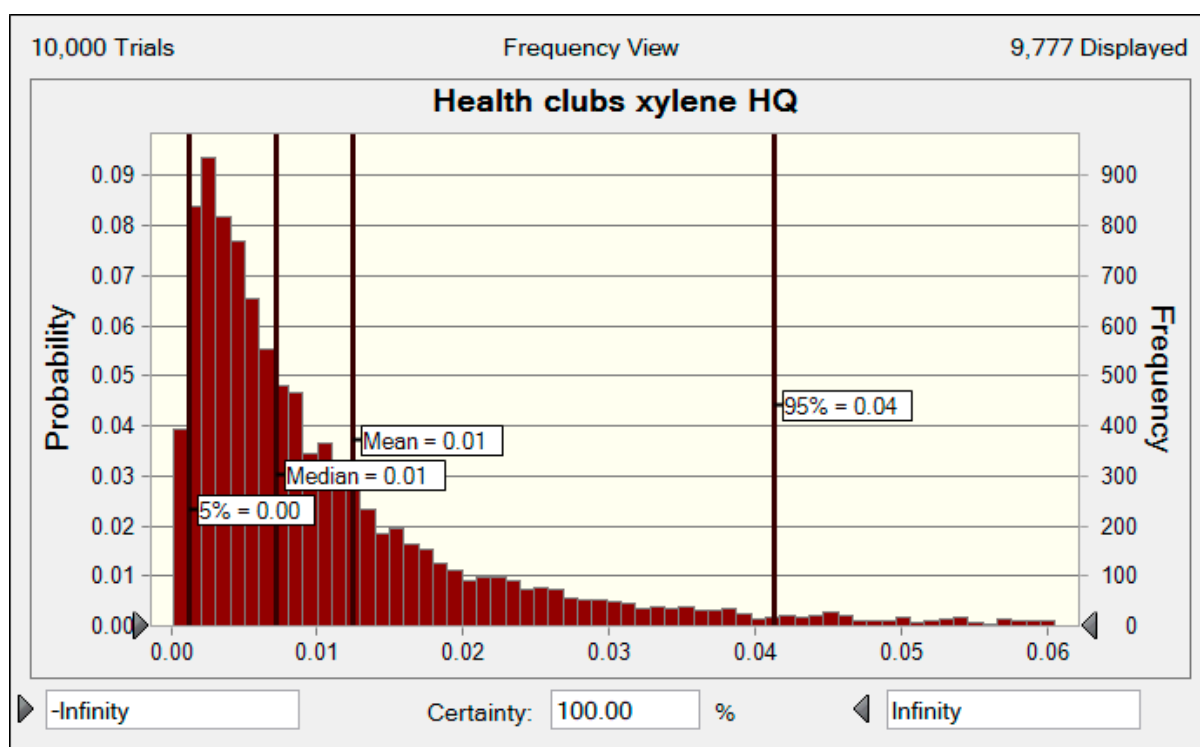

Figure S4. Probability distributions of BTEX cancer and non-cancer risk in health clubs.

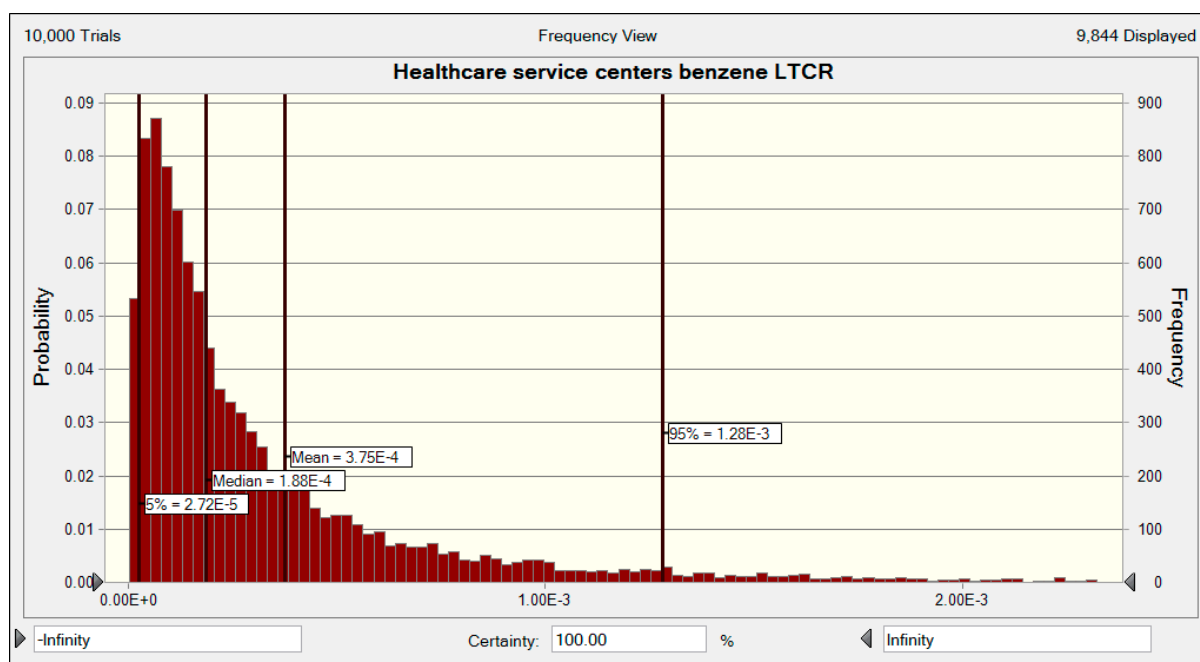

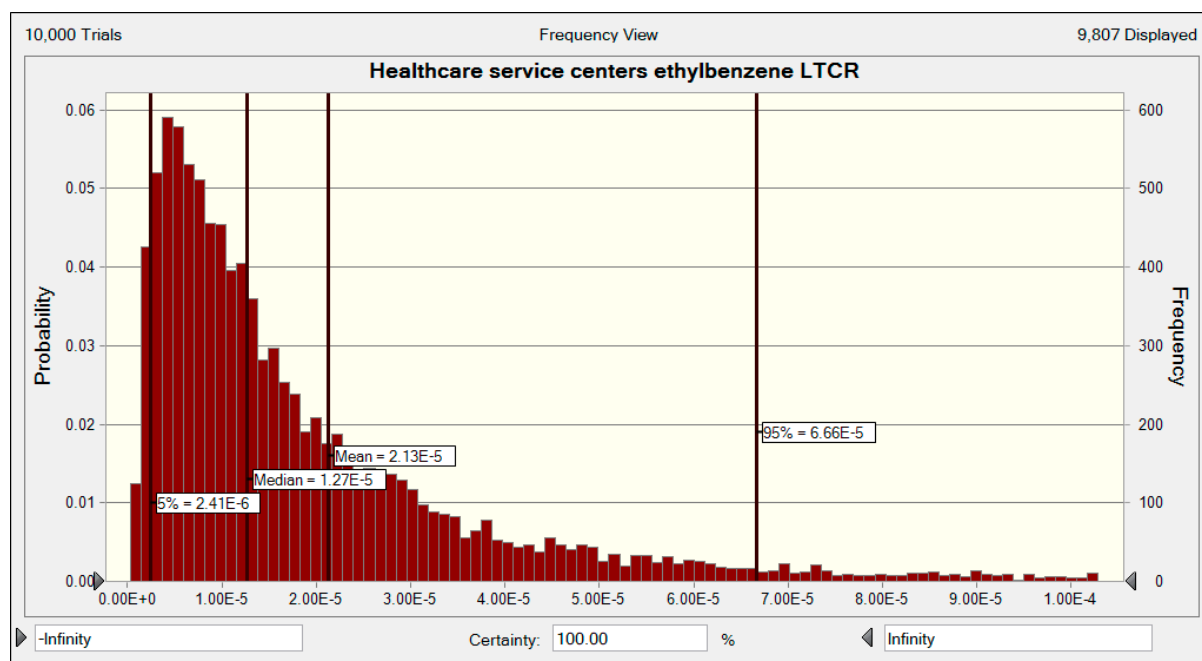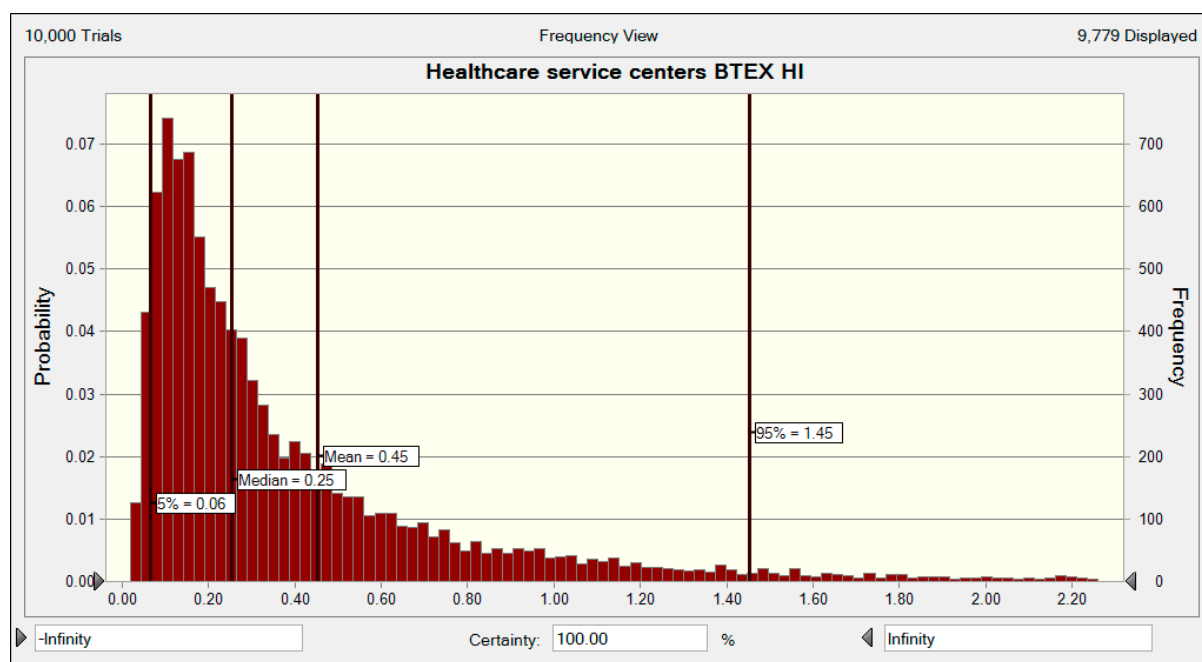



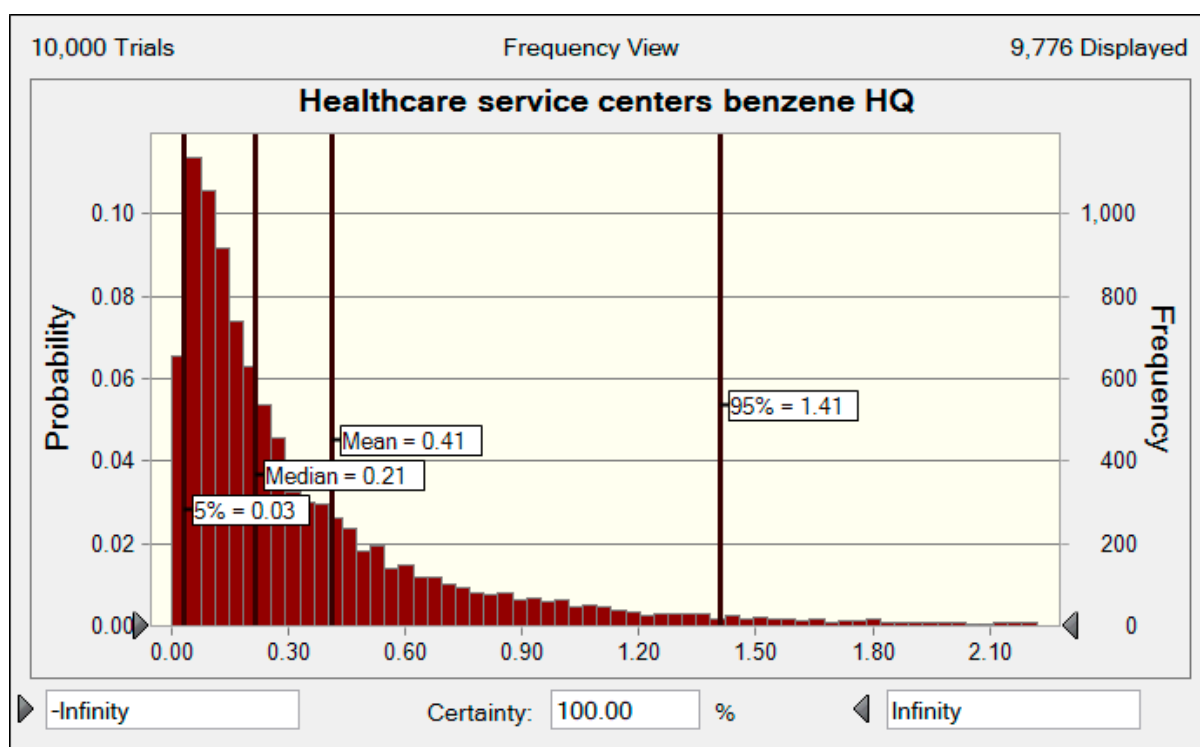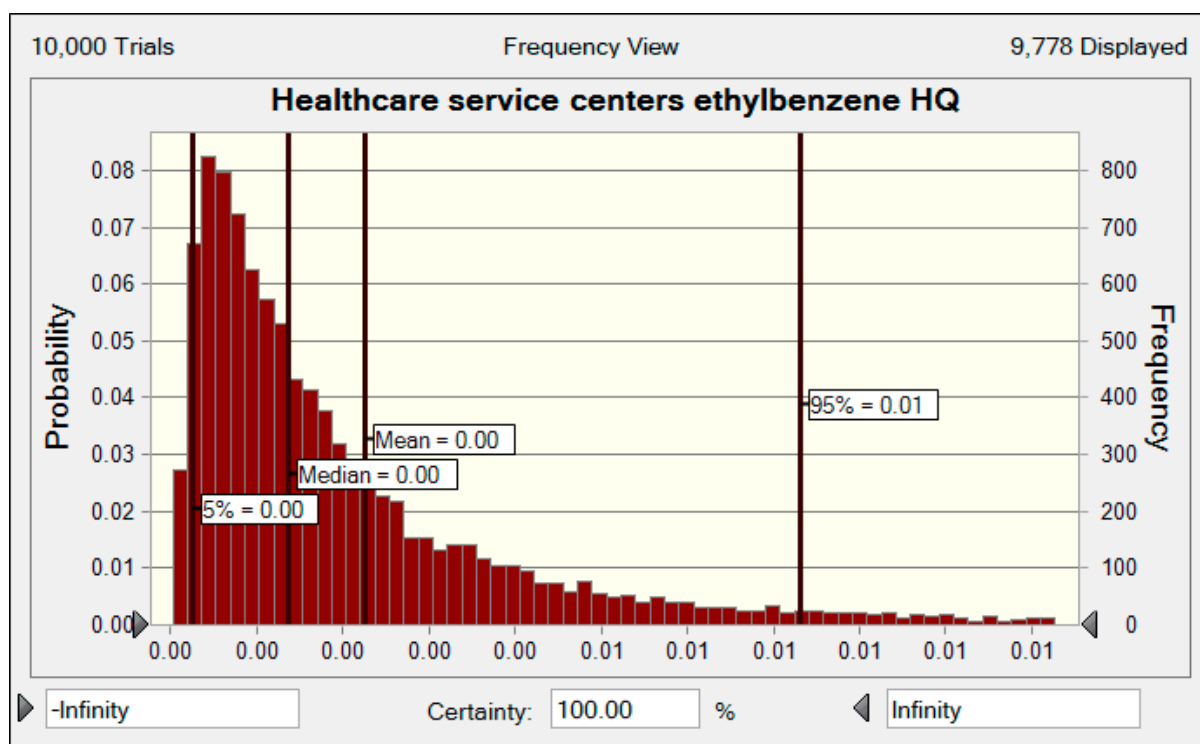

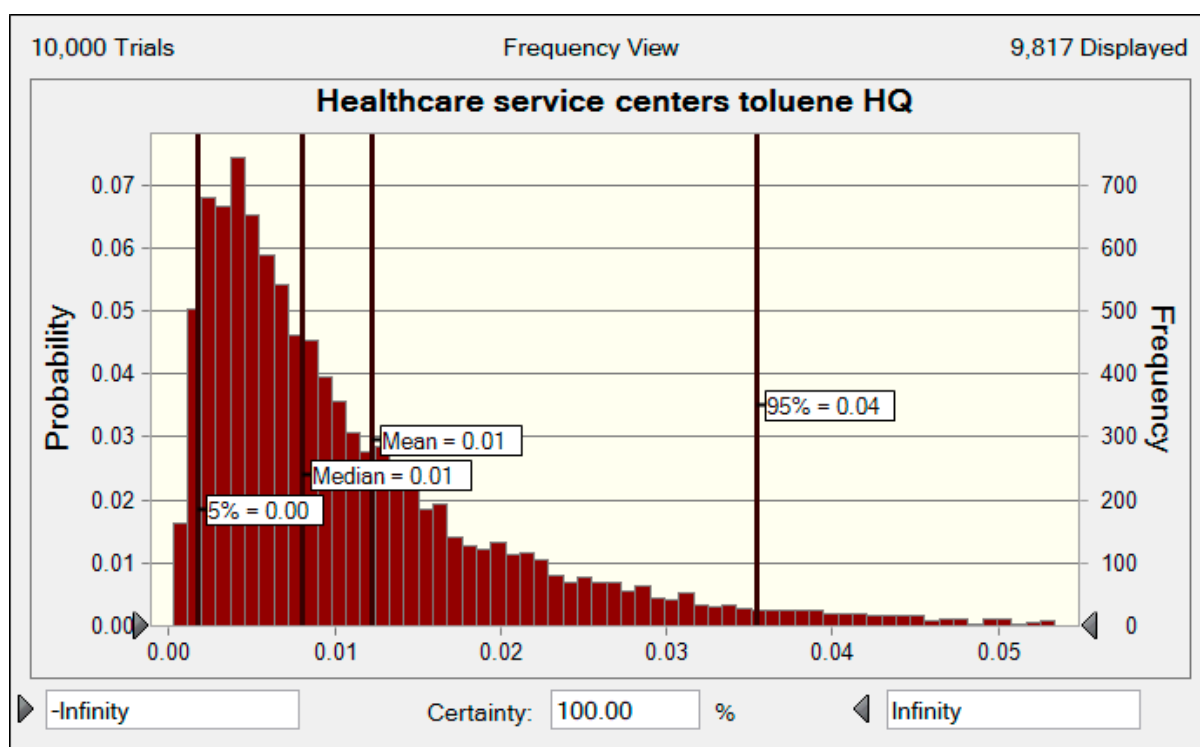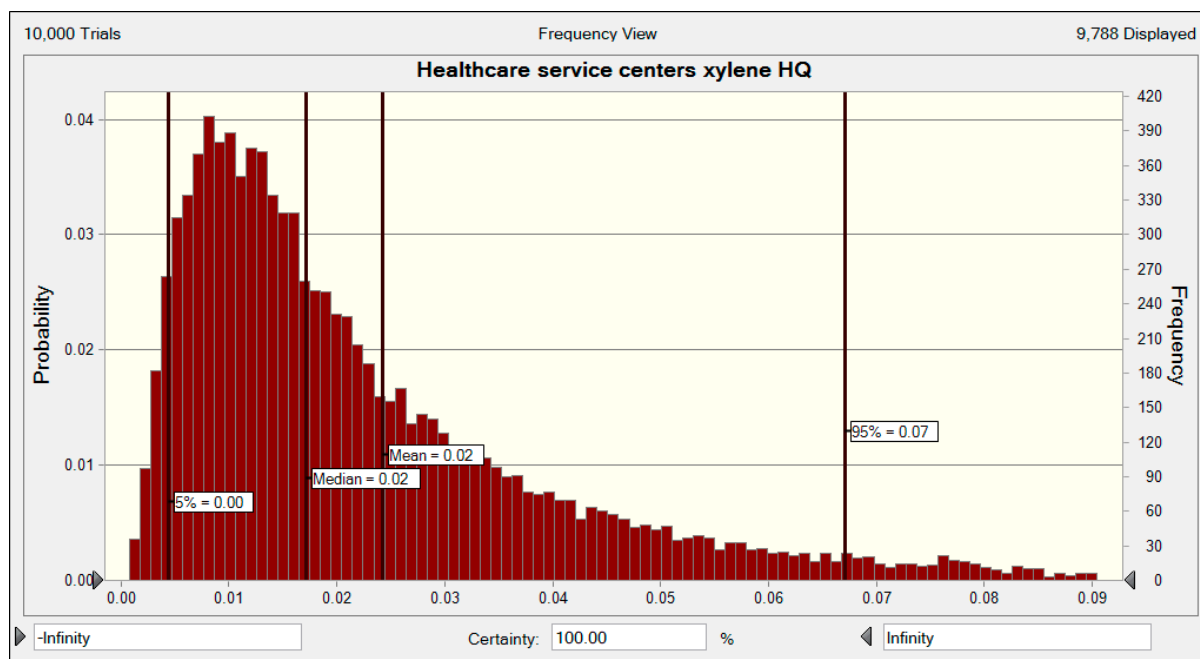

Figure S5. Probability distributions of BTEX cancer and non-cancer risk in healthcare service centers.

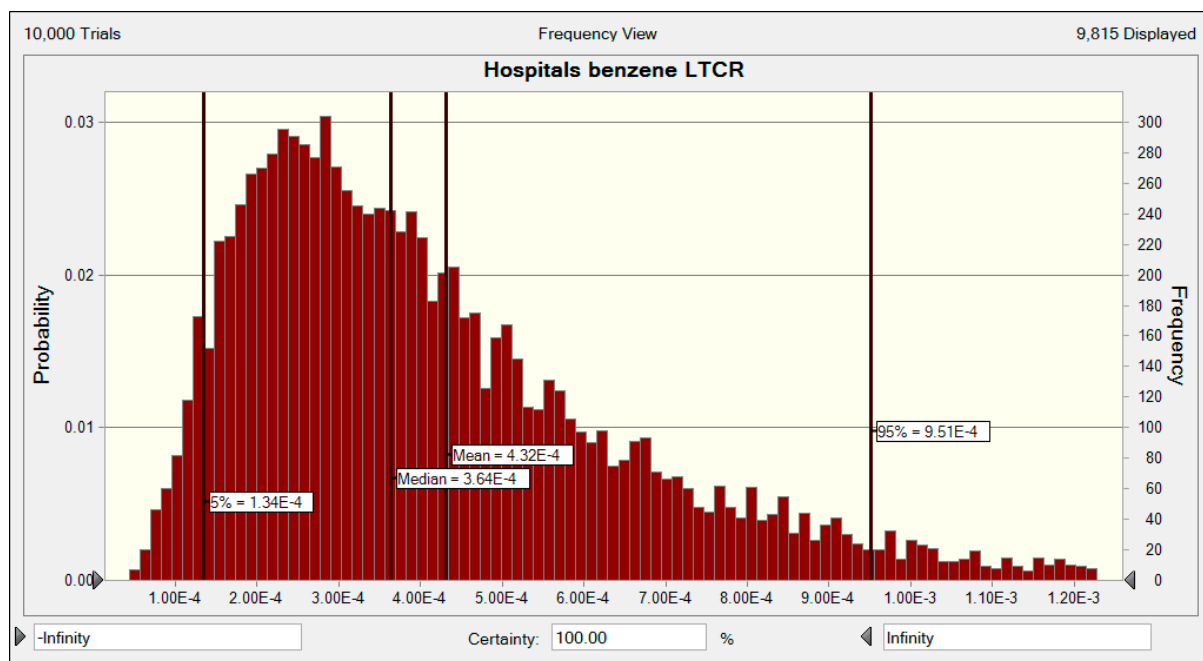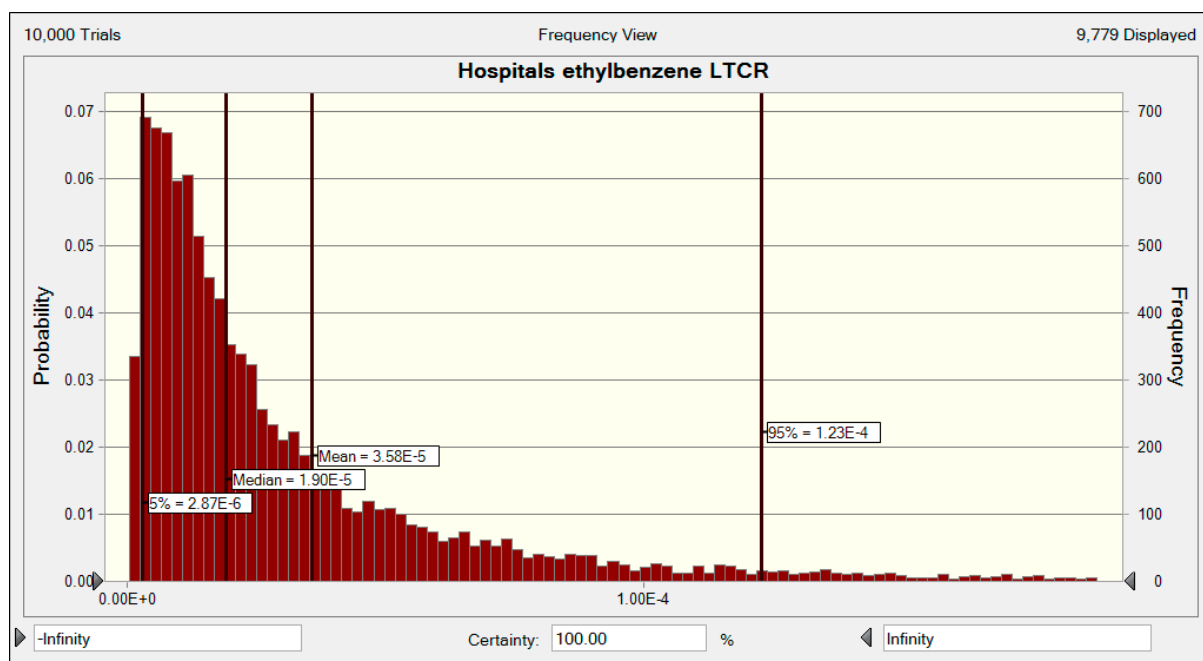

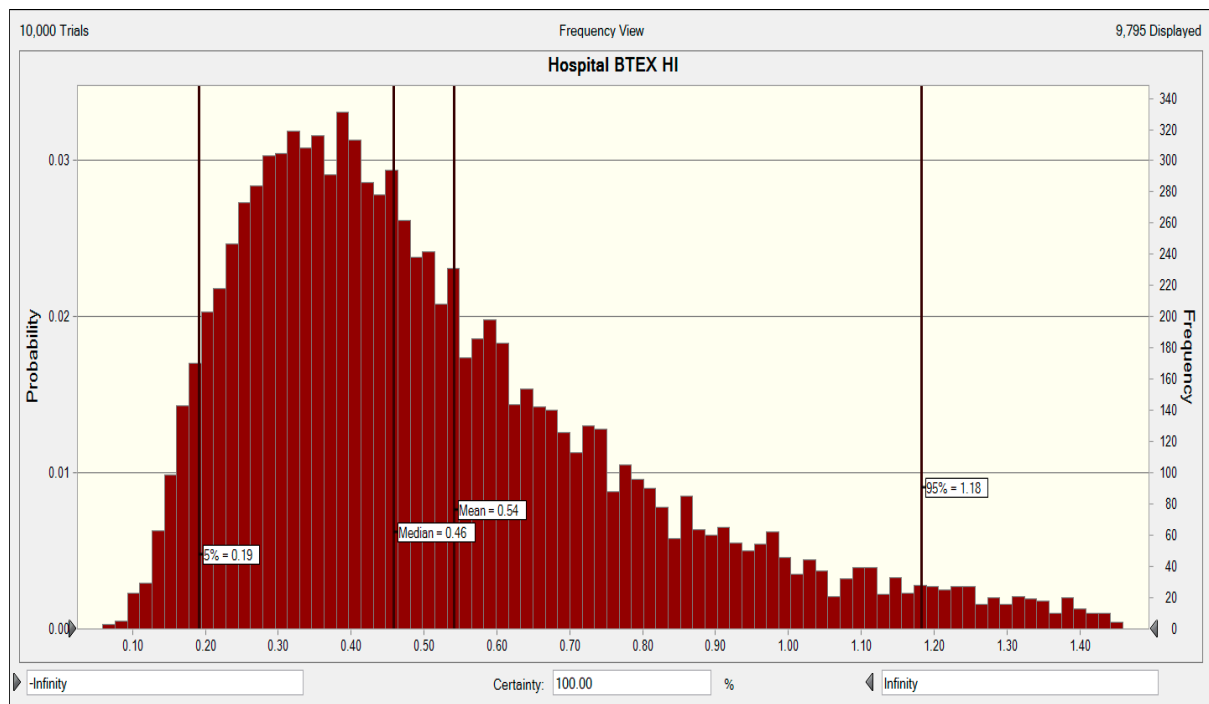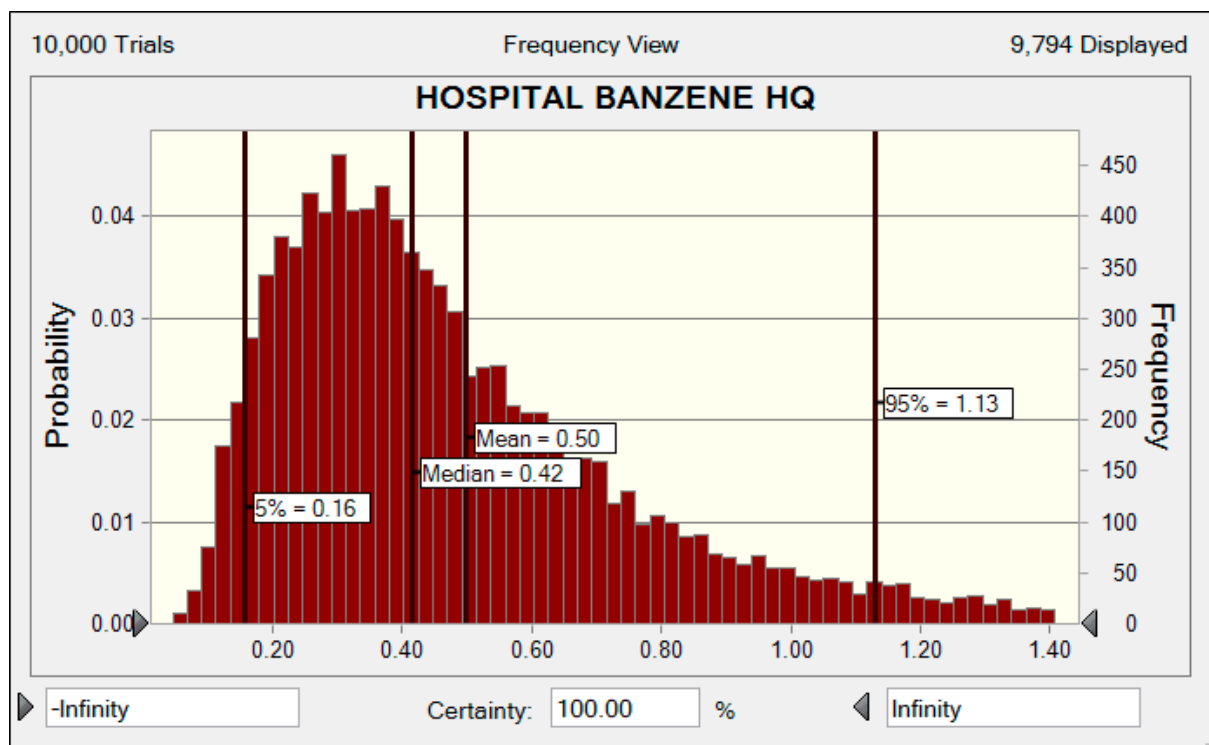

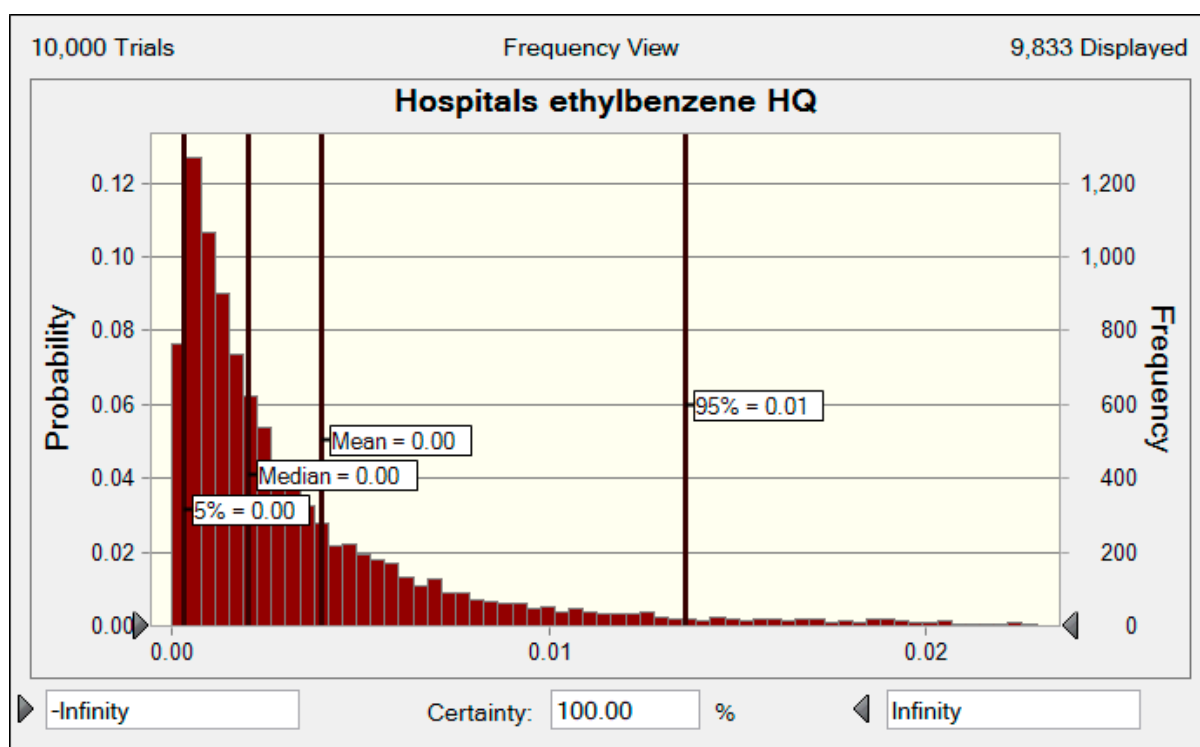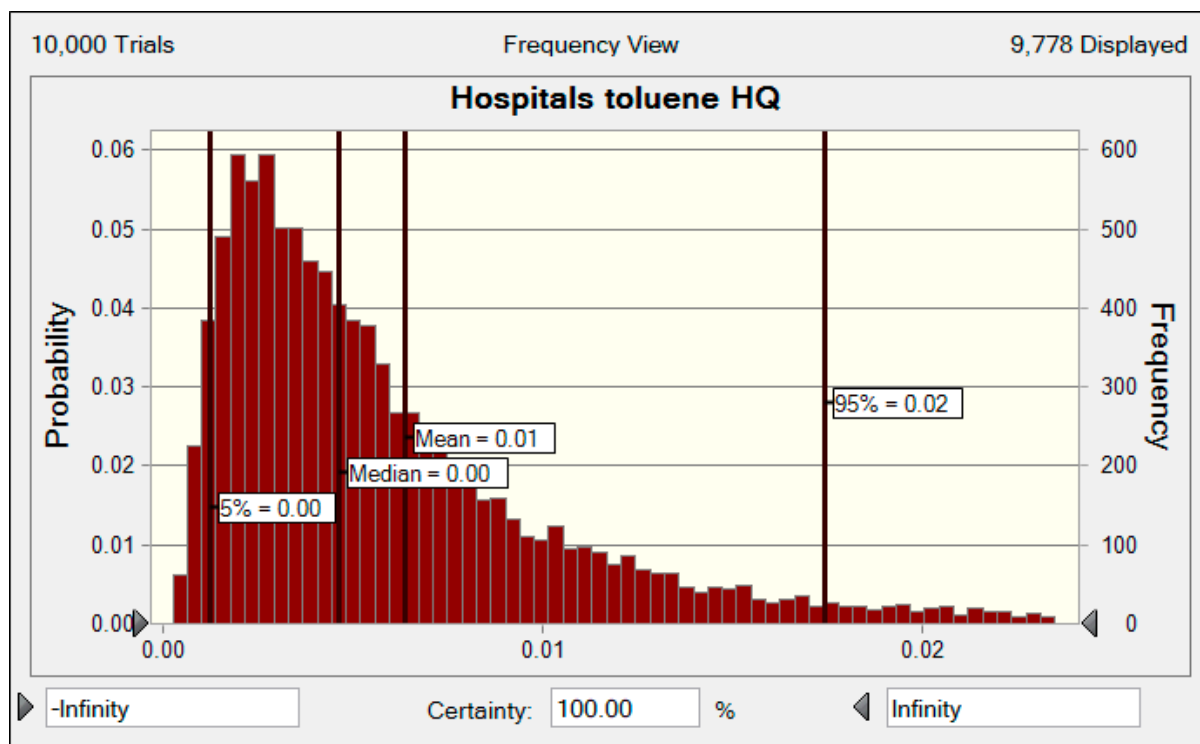

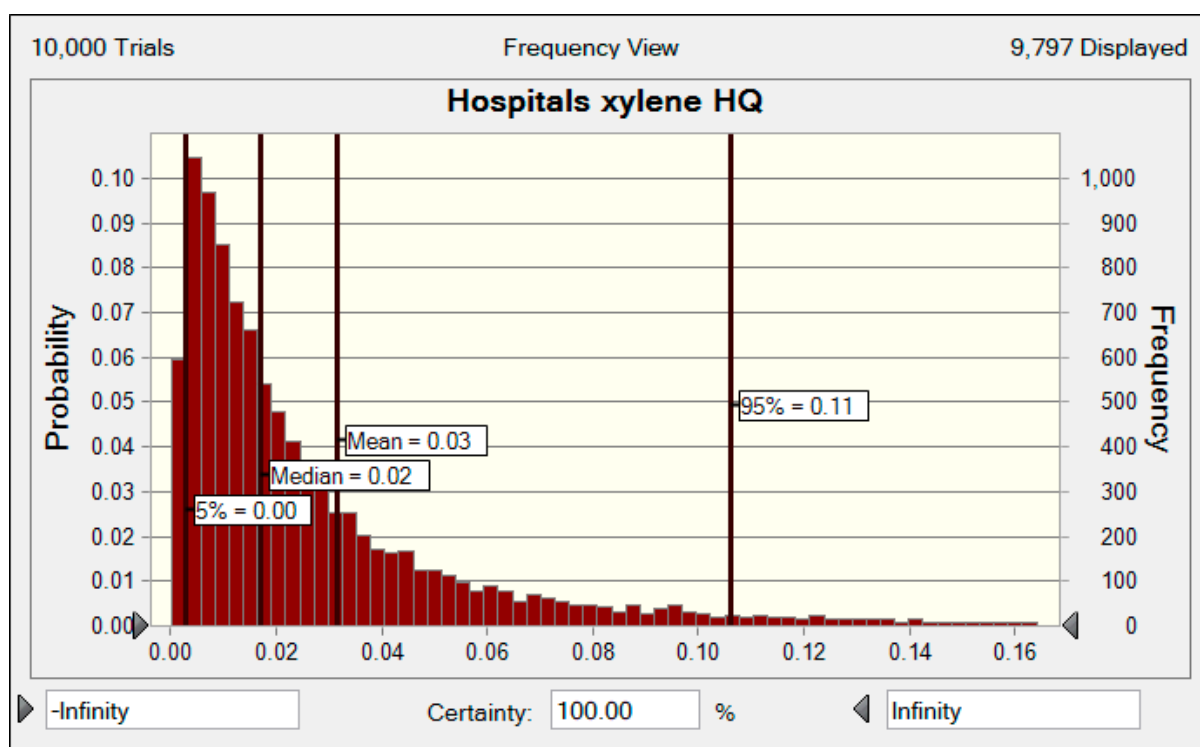

Figure S6. Probability distributions of BTEX cancer and non-cancer risk in hospitals.

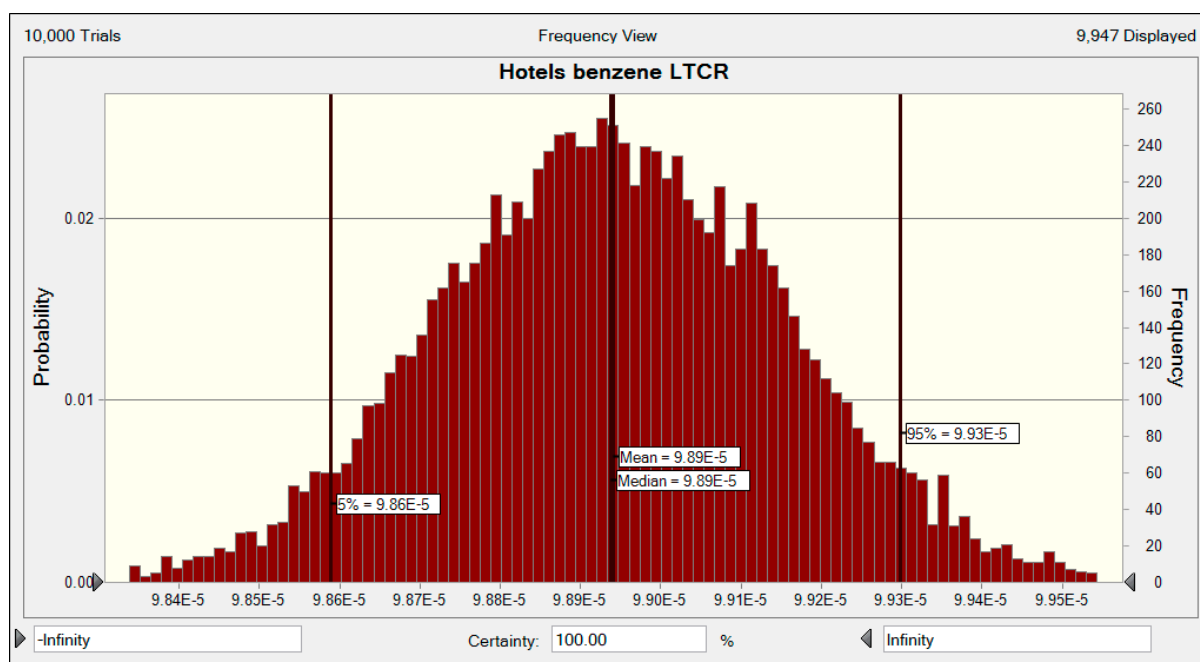

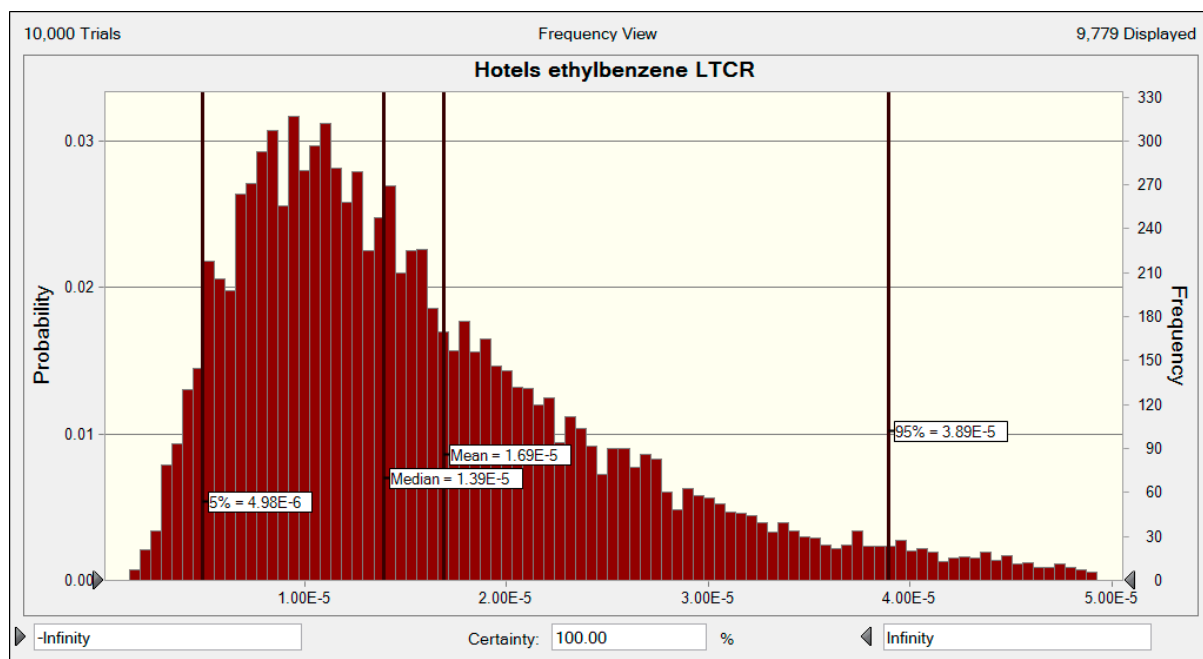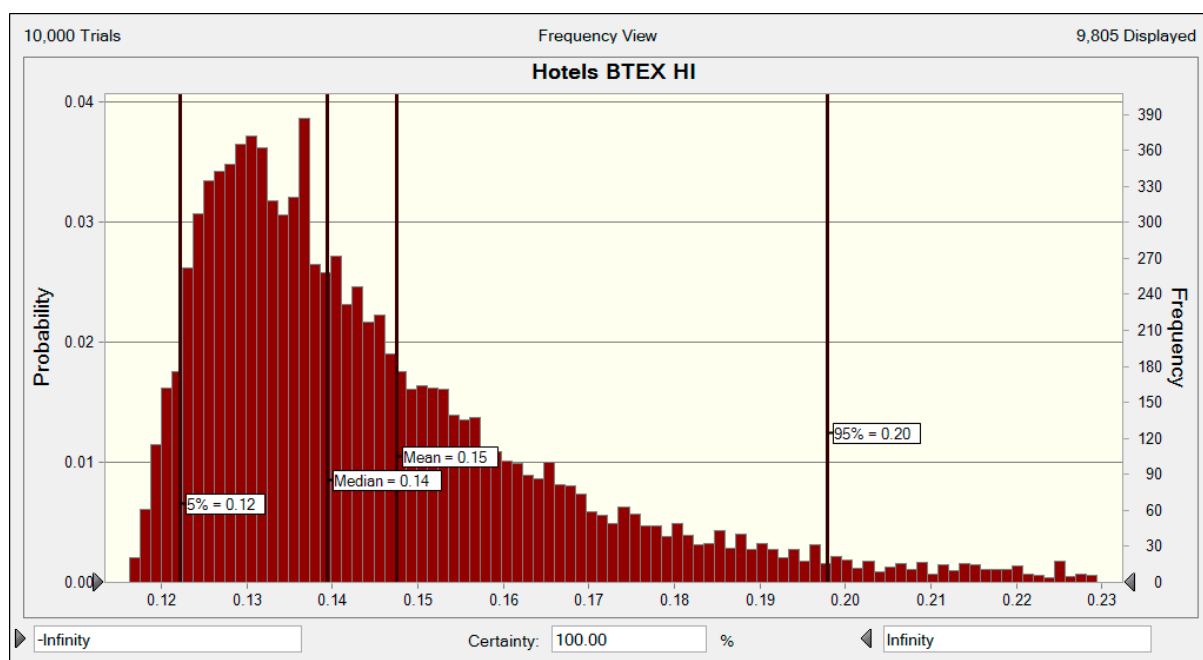

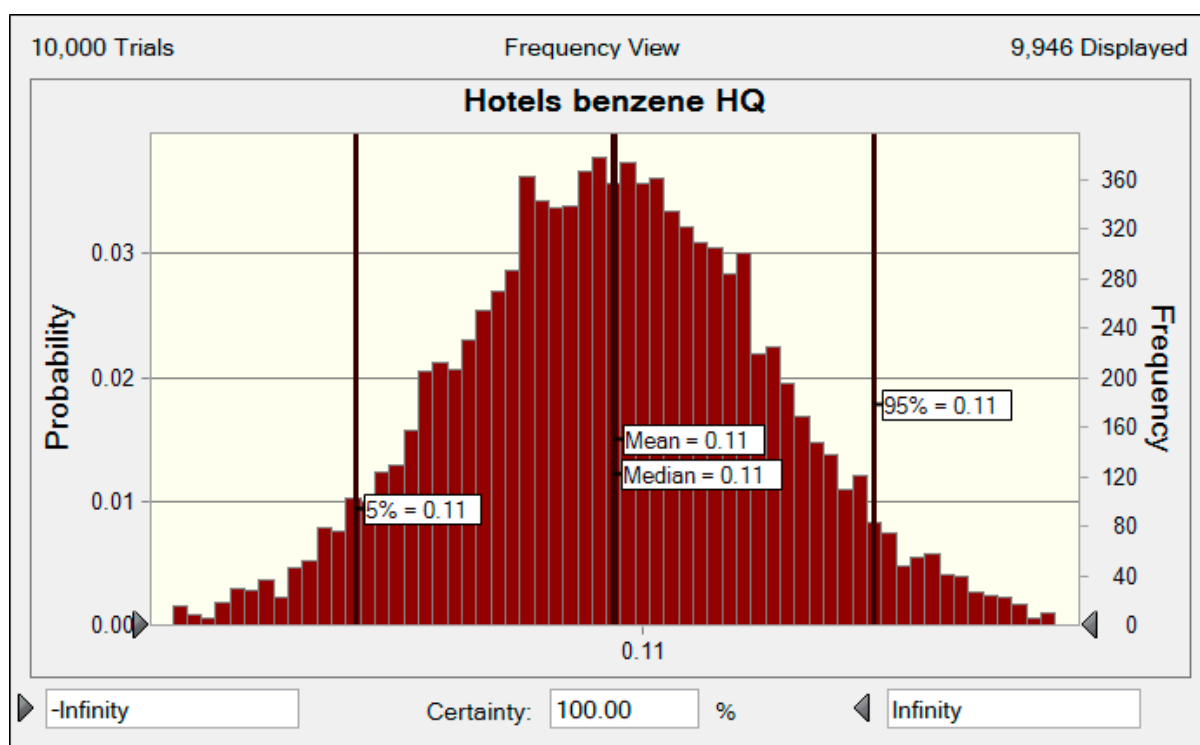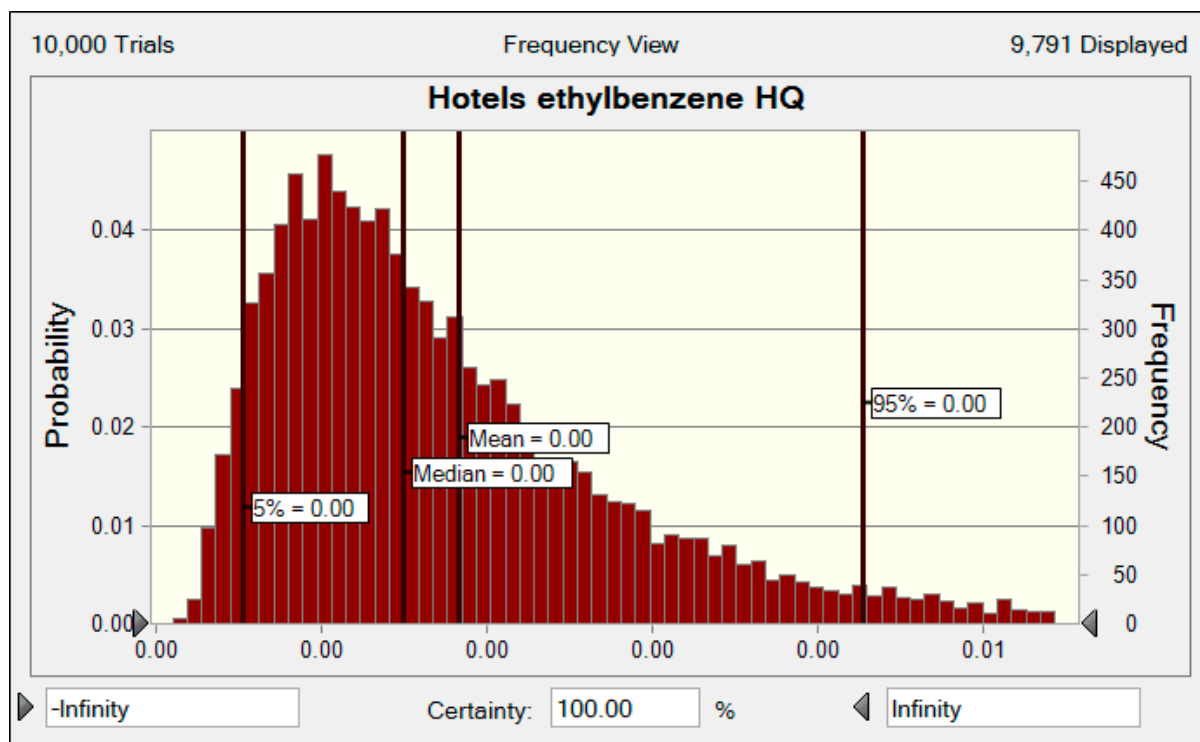



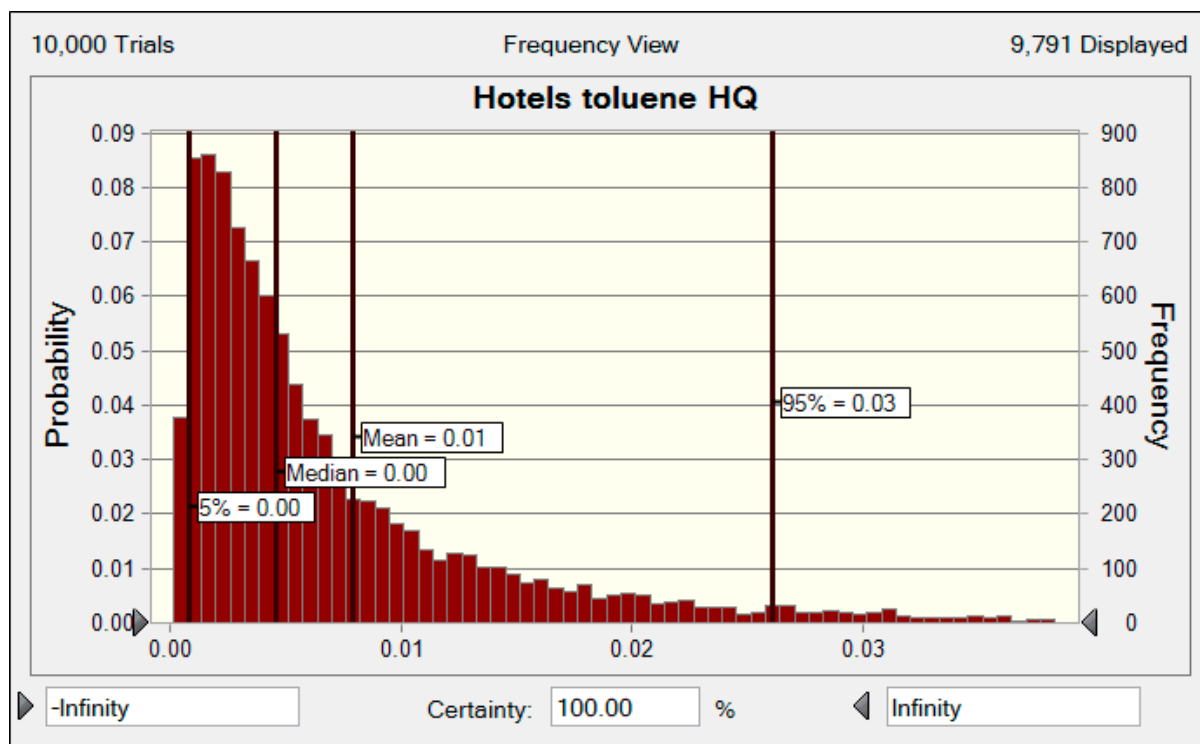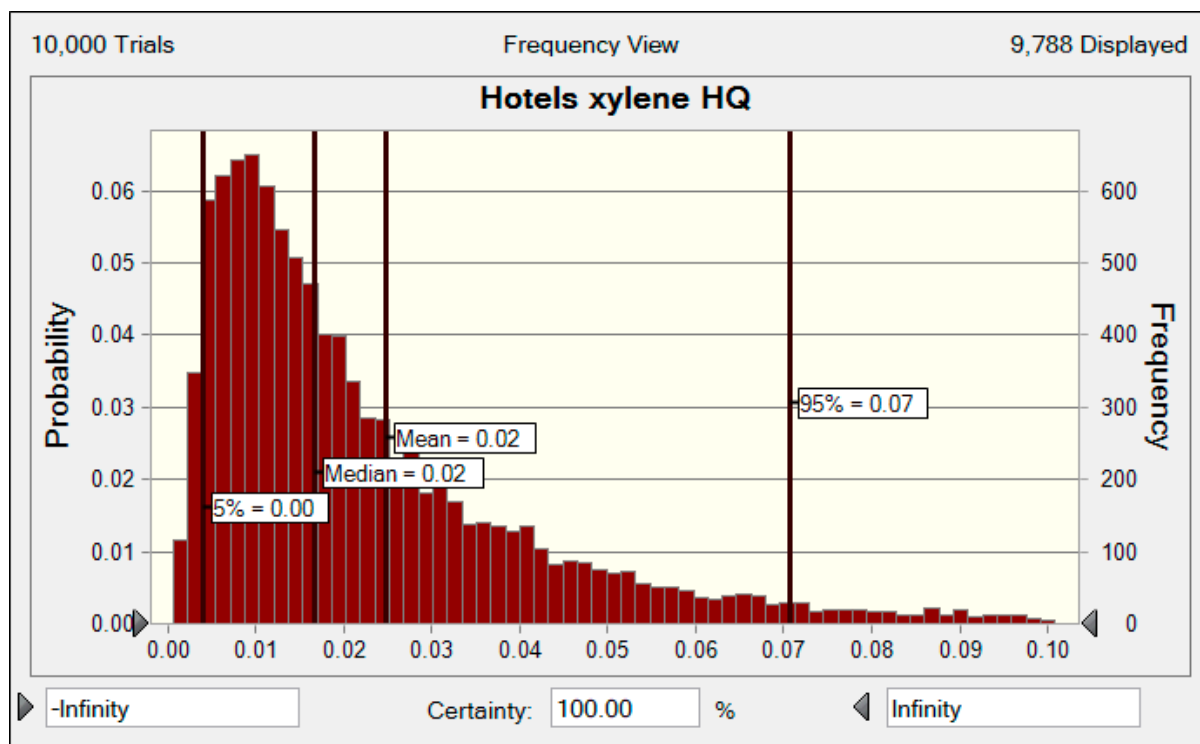

Figure S7. Probability distributions of BTEX cancer and non-cancer risk in hotels.

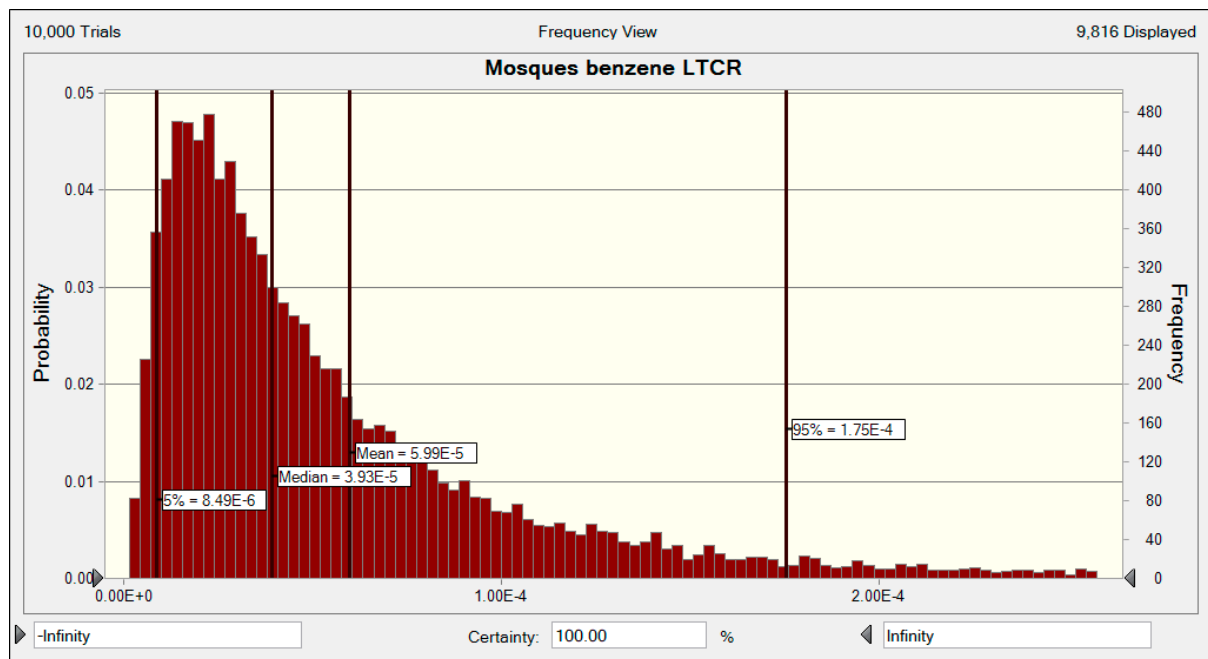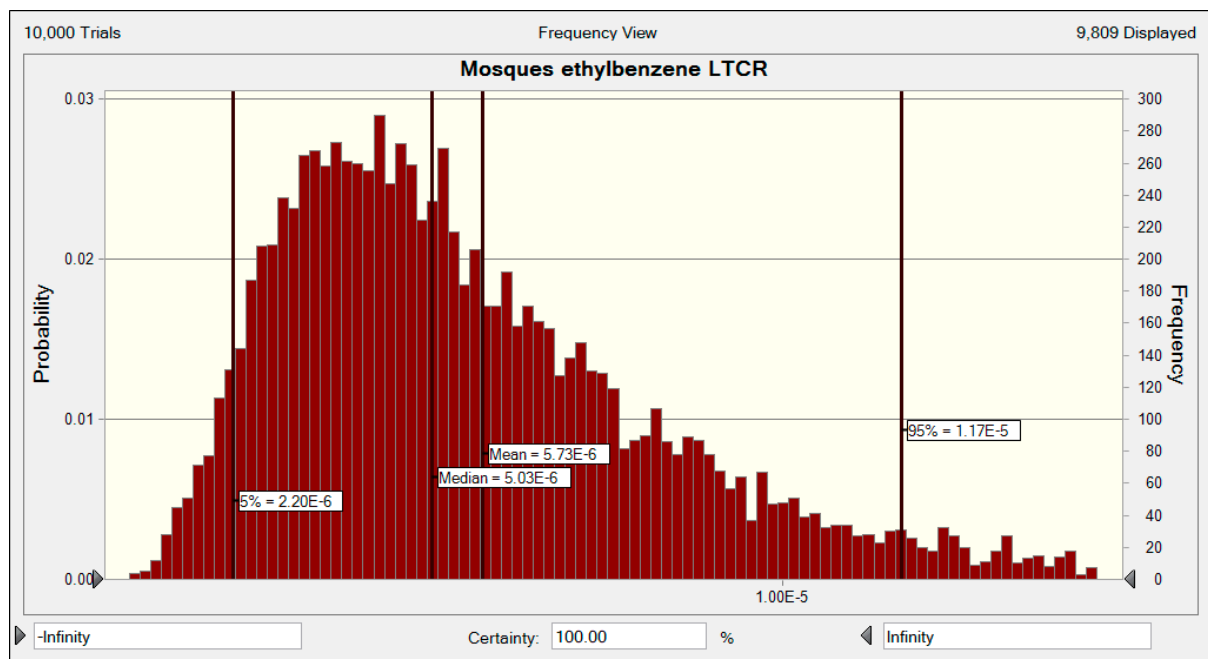

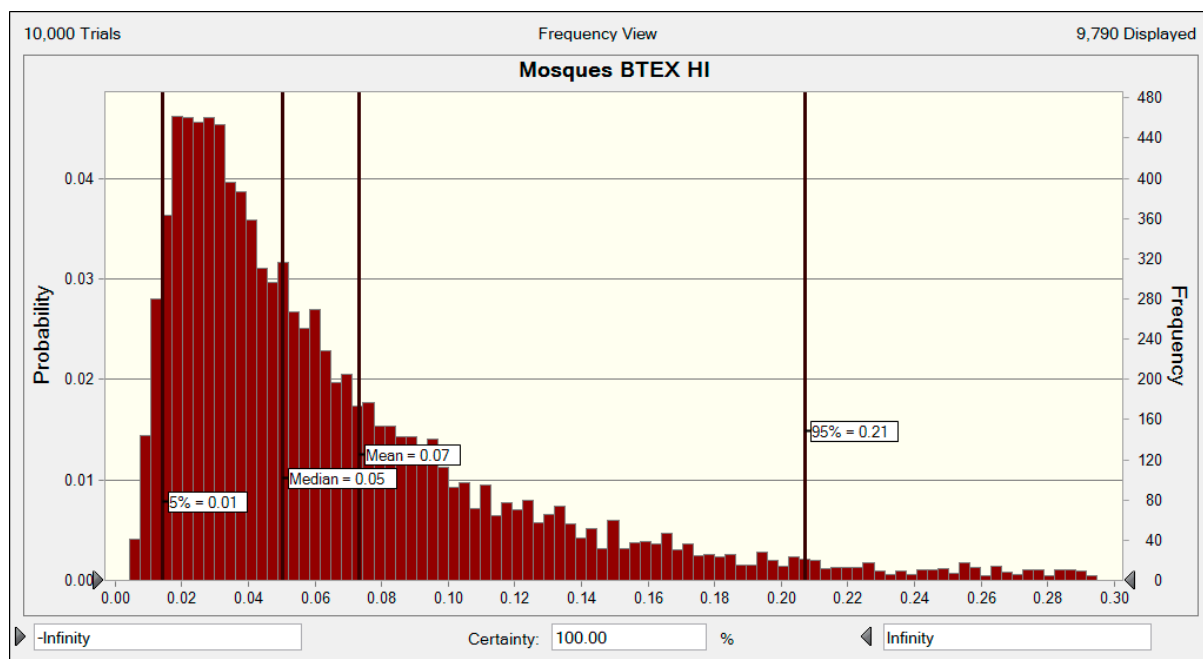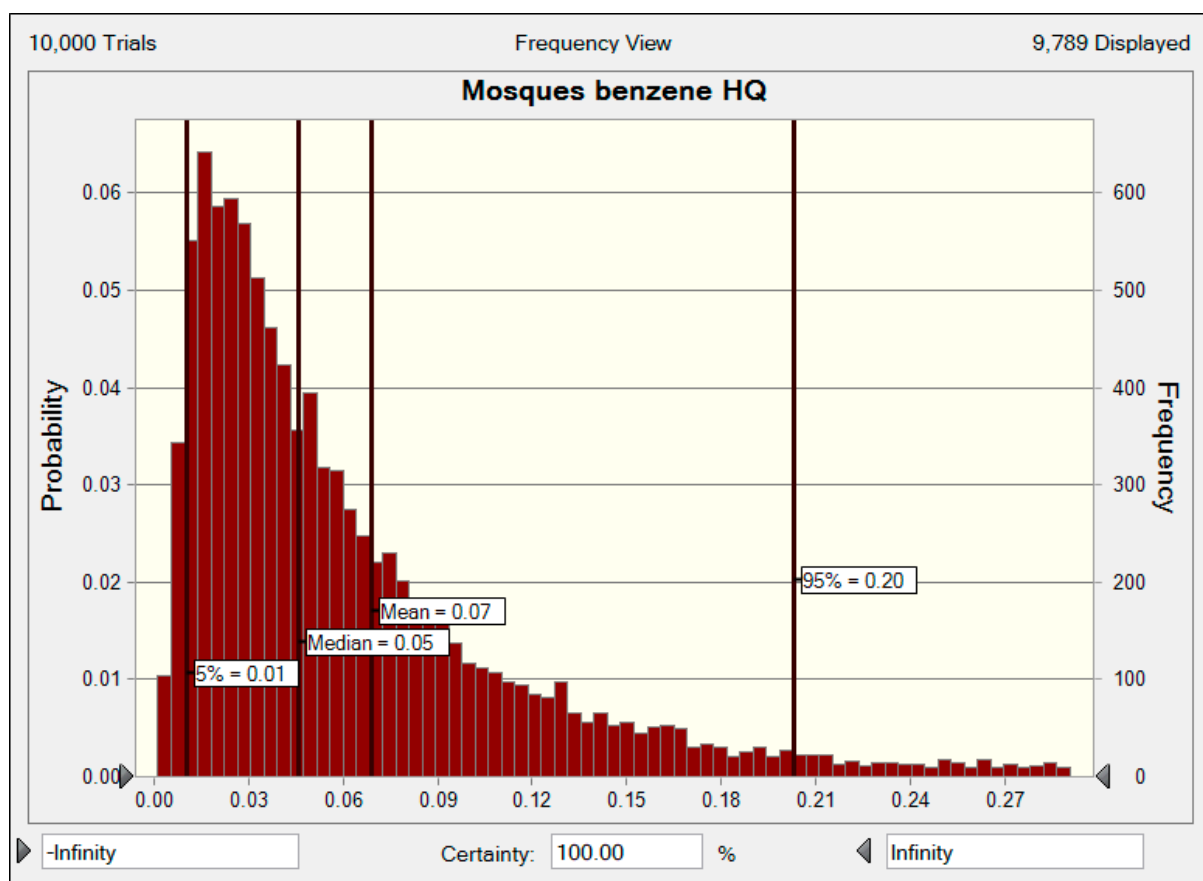

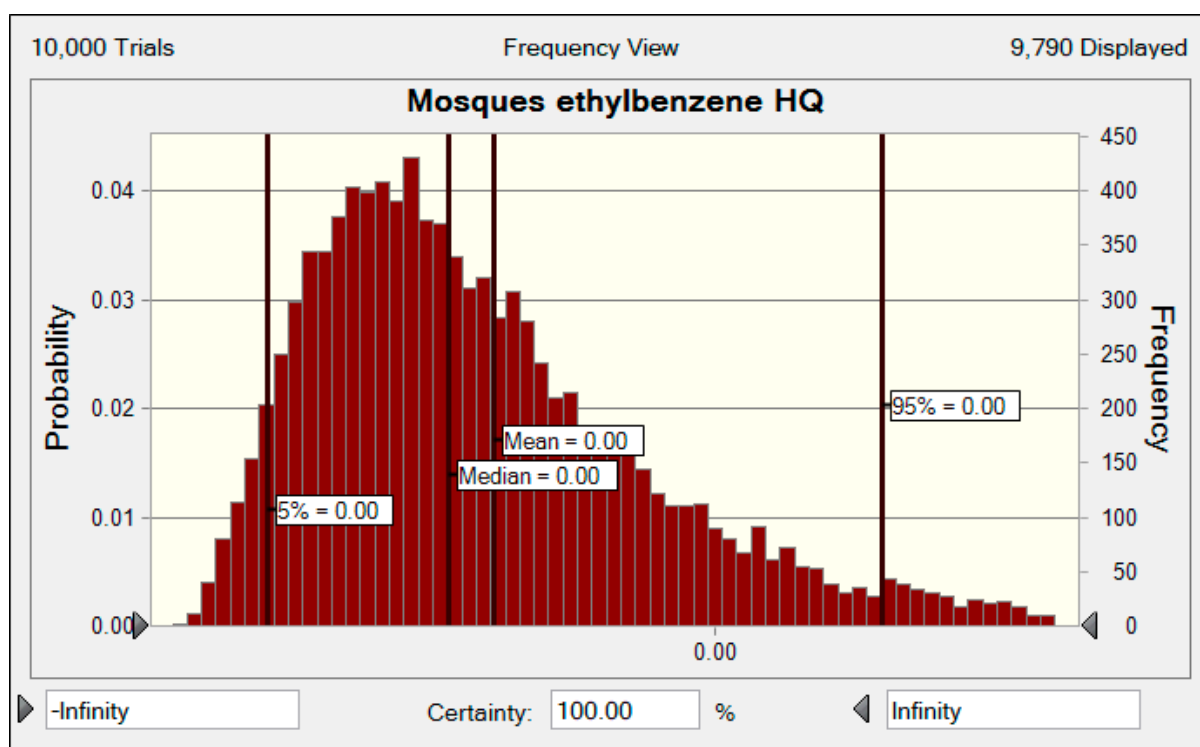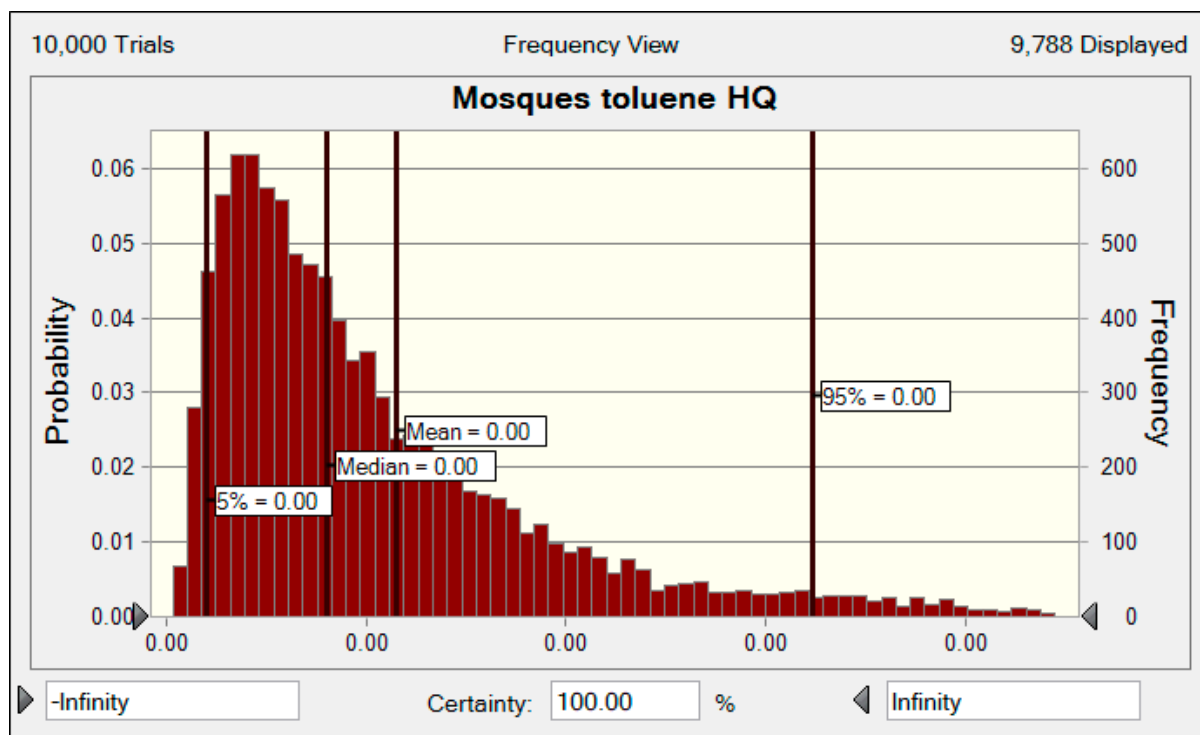

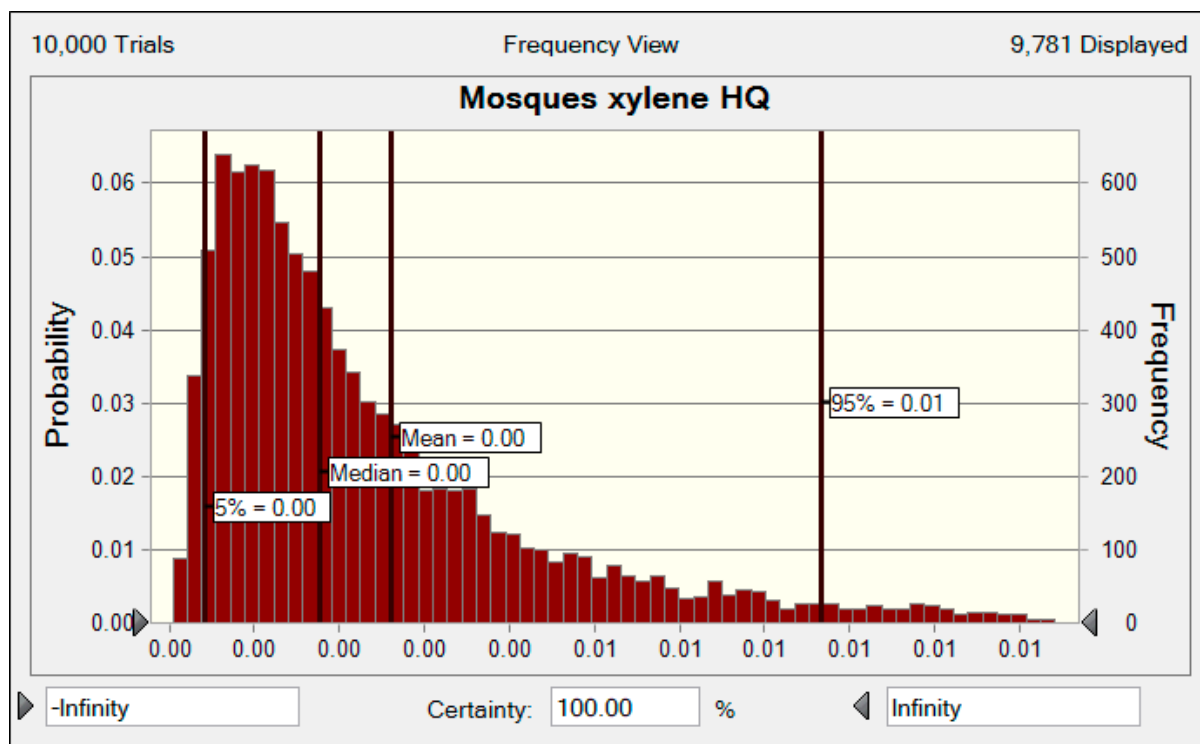

Figure S8. Probability distributions of BTEX cancer and non-cancer risk in mosques.

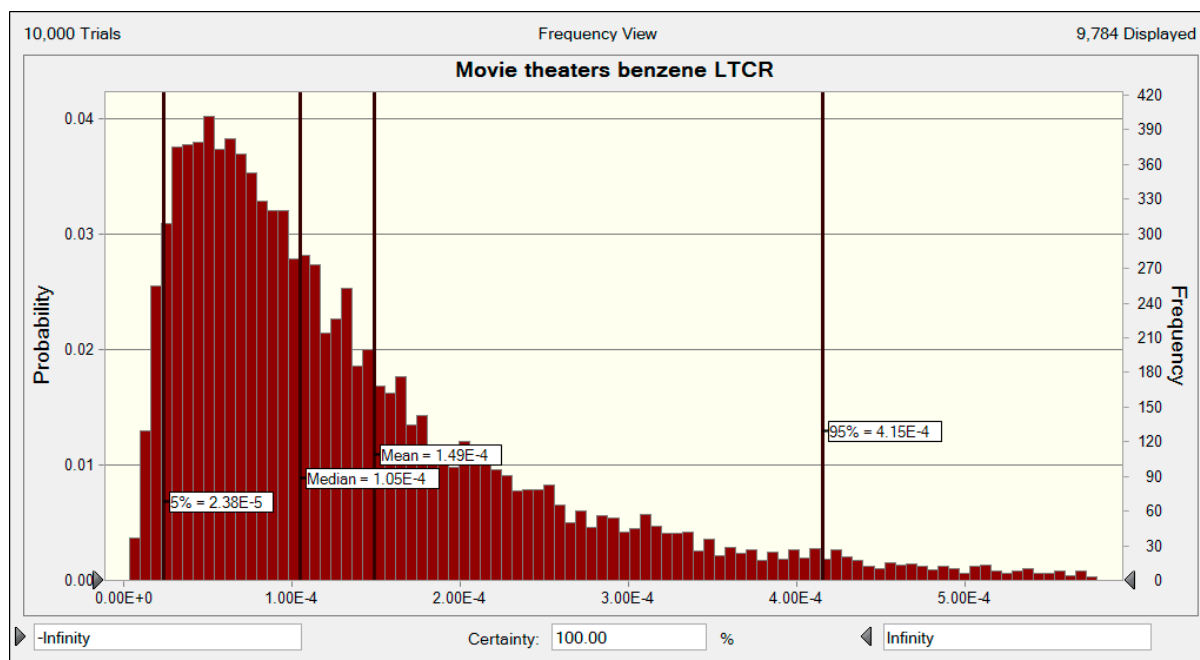

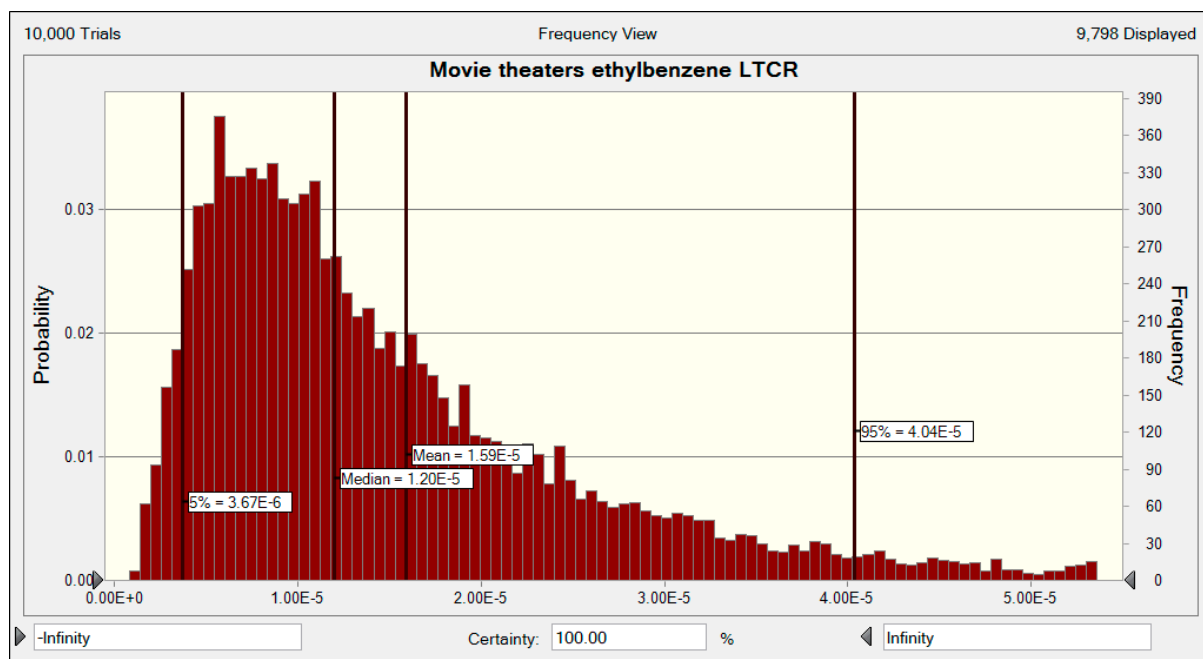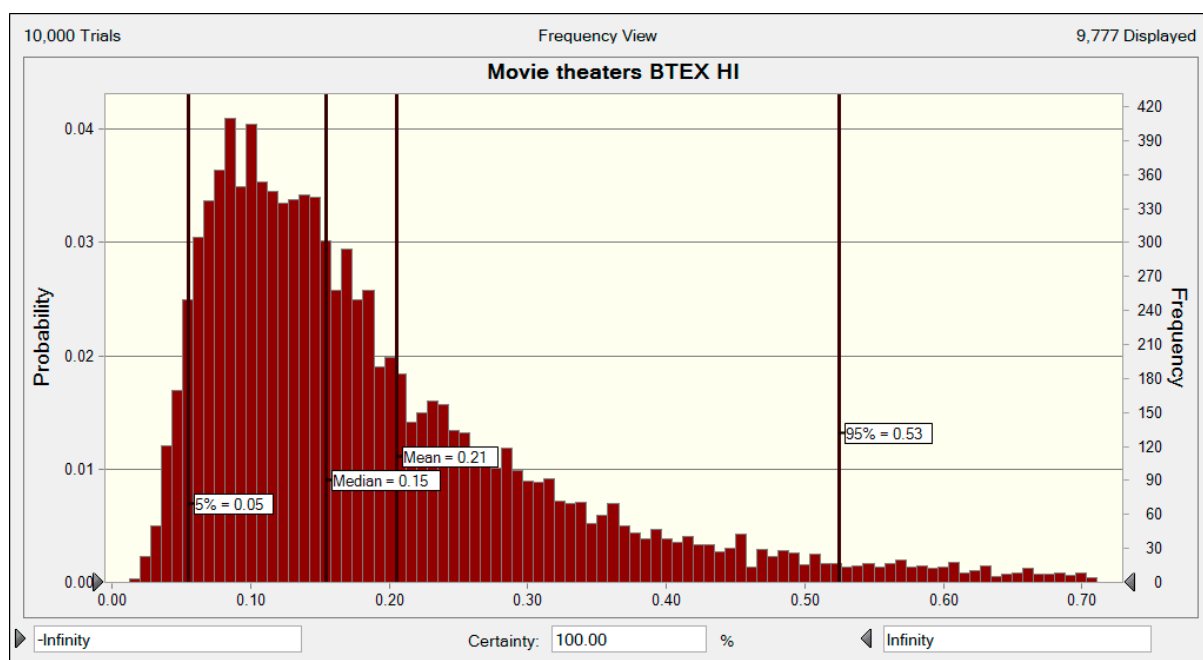

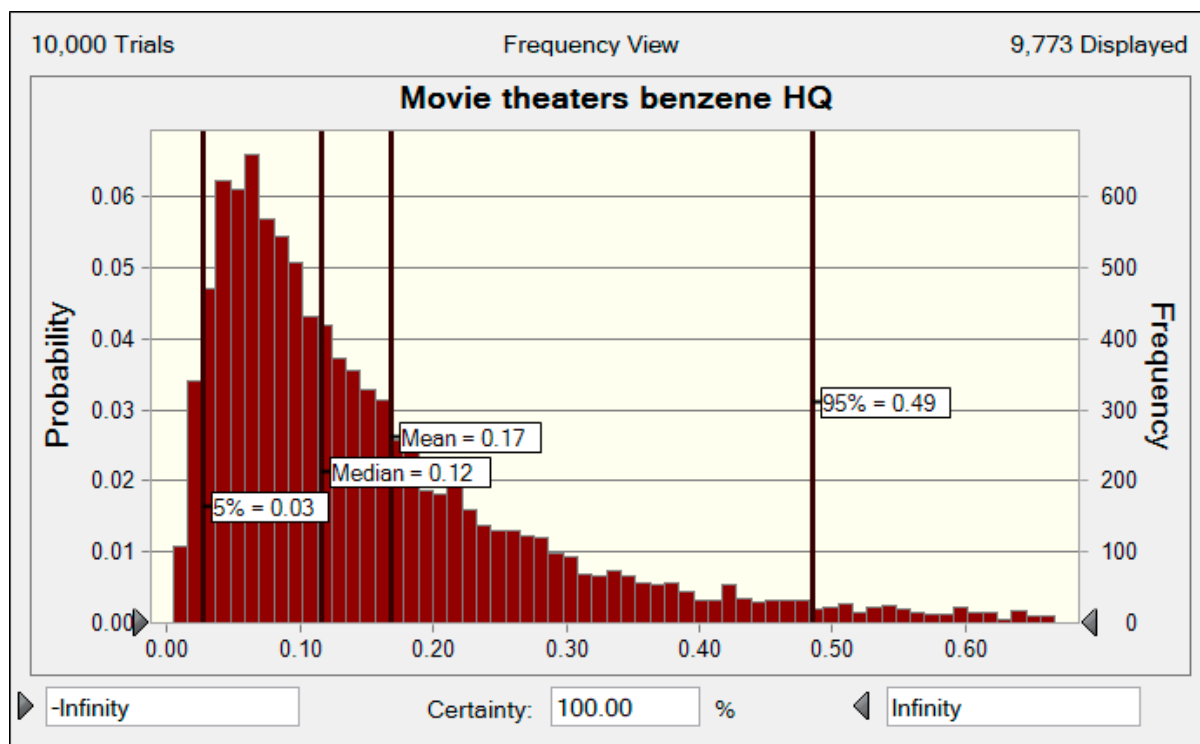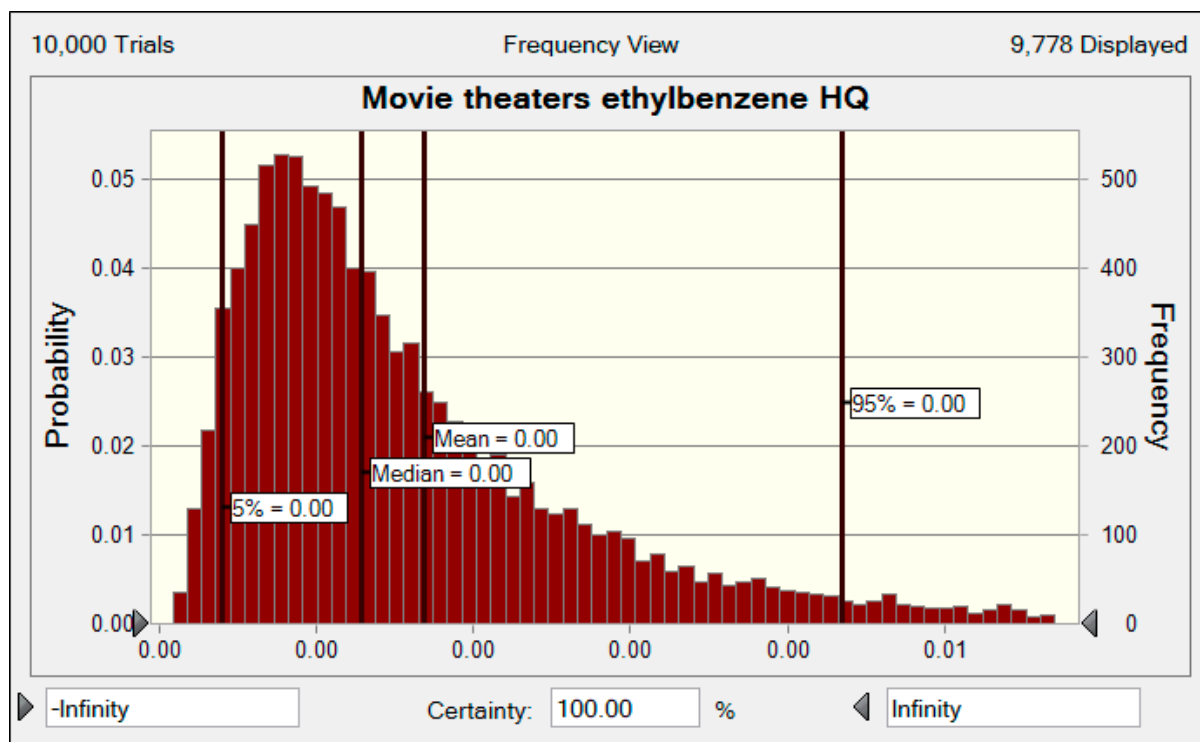

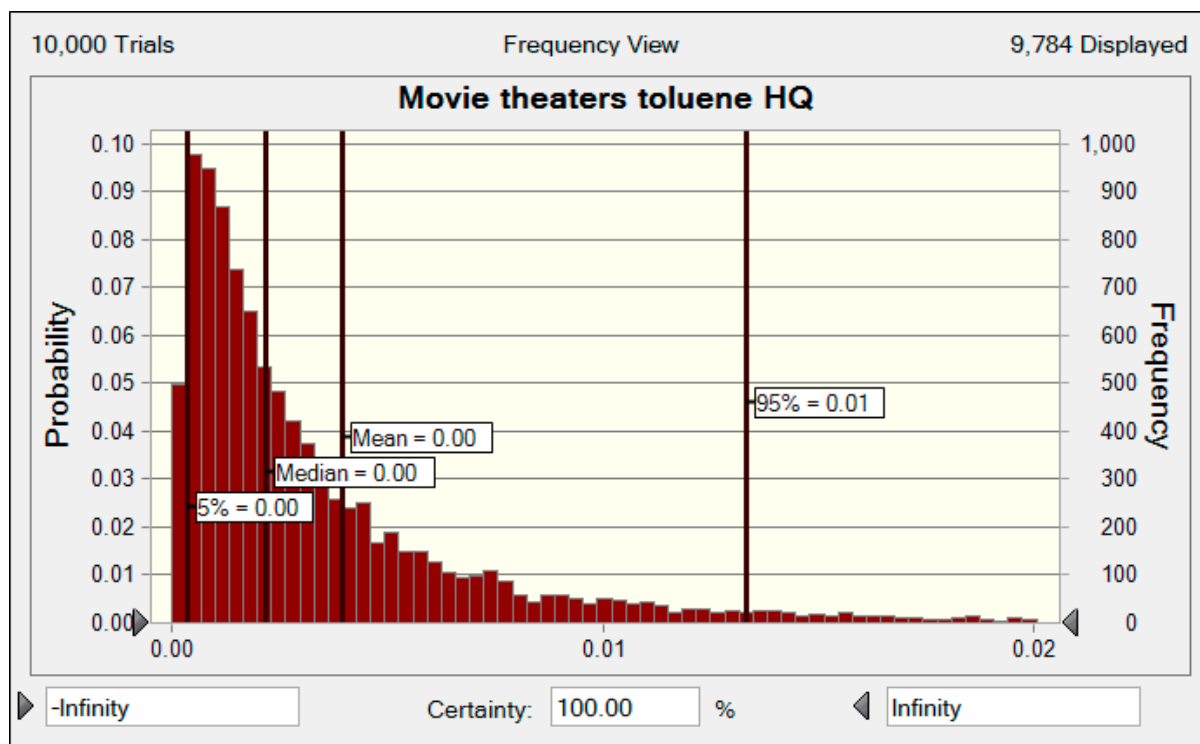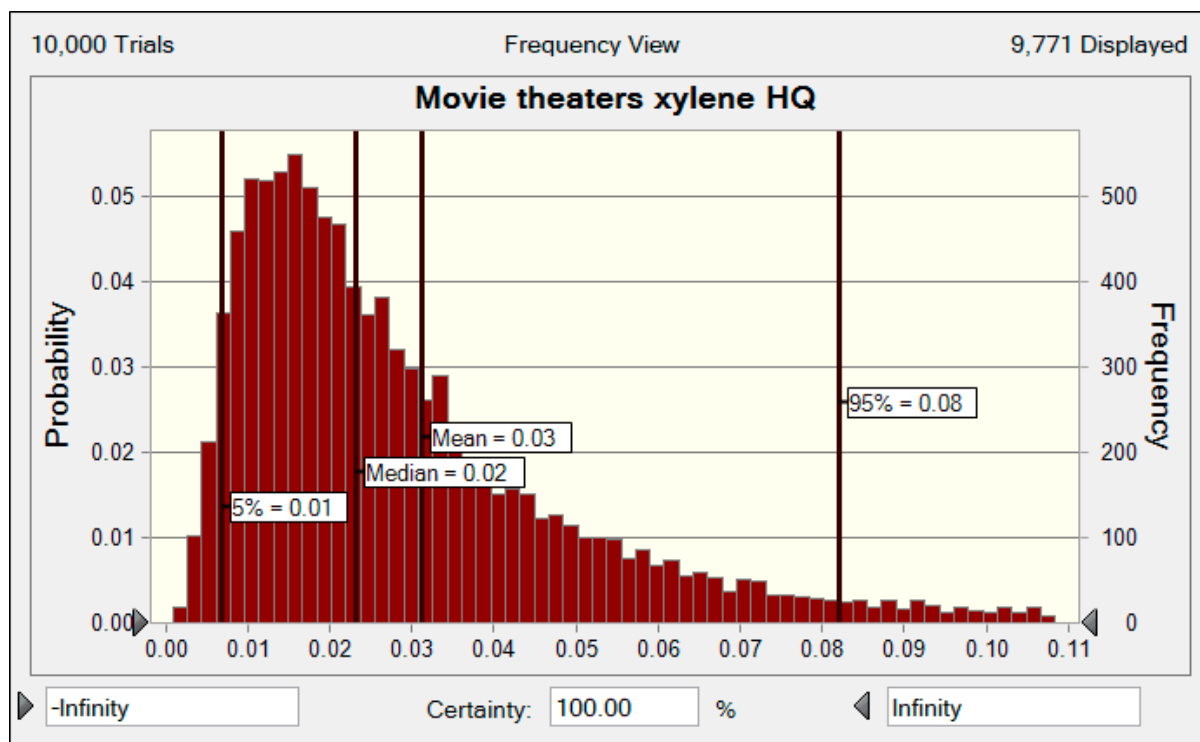

Figure S9. Probability distributions of BTEX cancer and non-cancer risk in movie theaters.



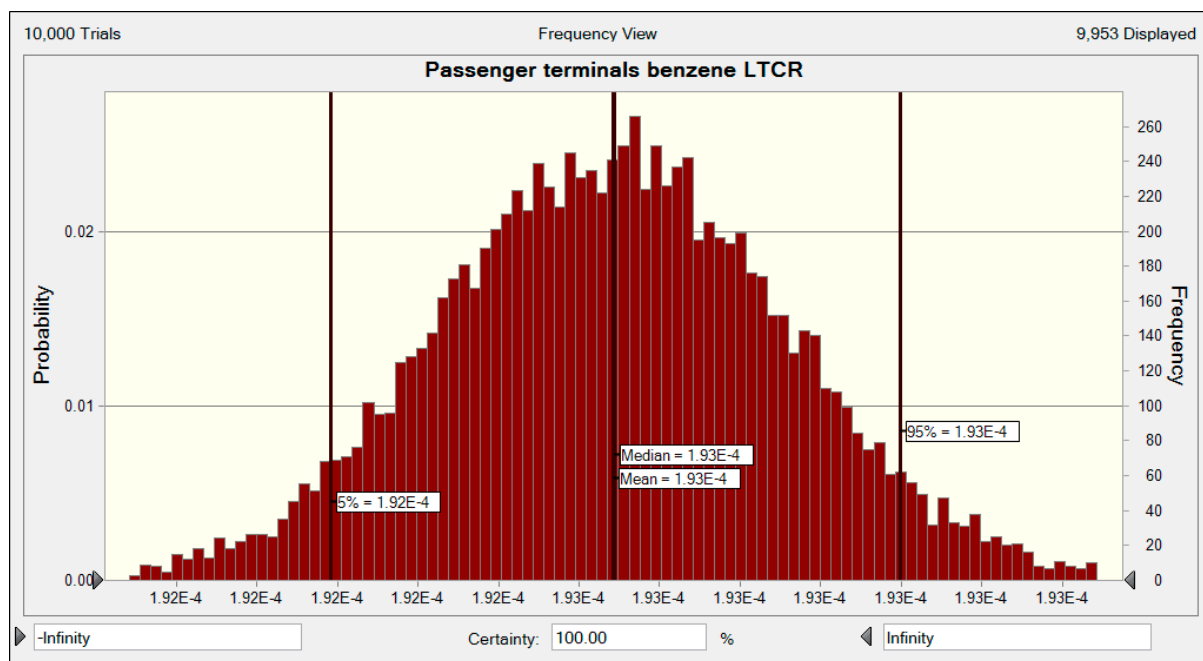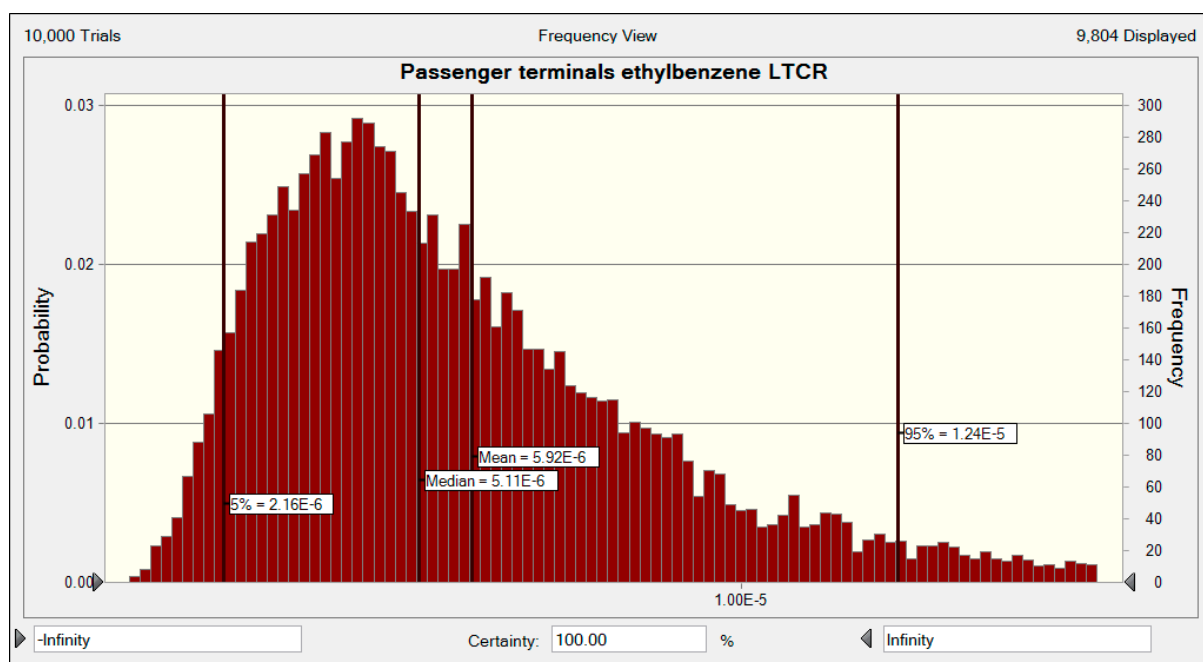

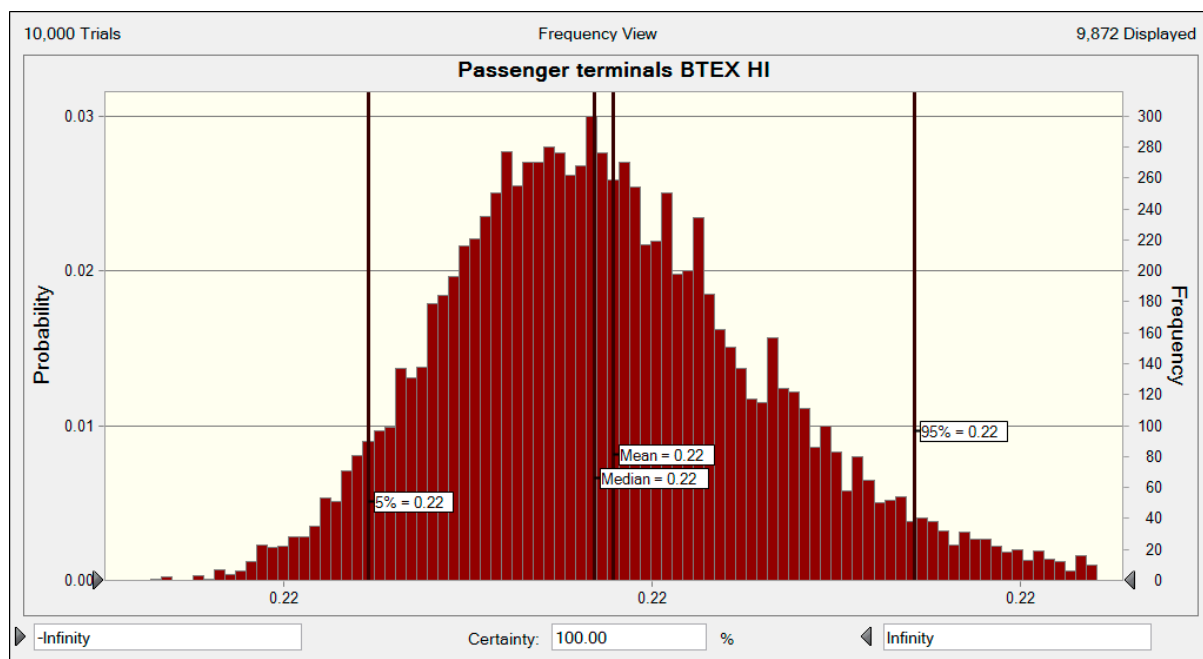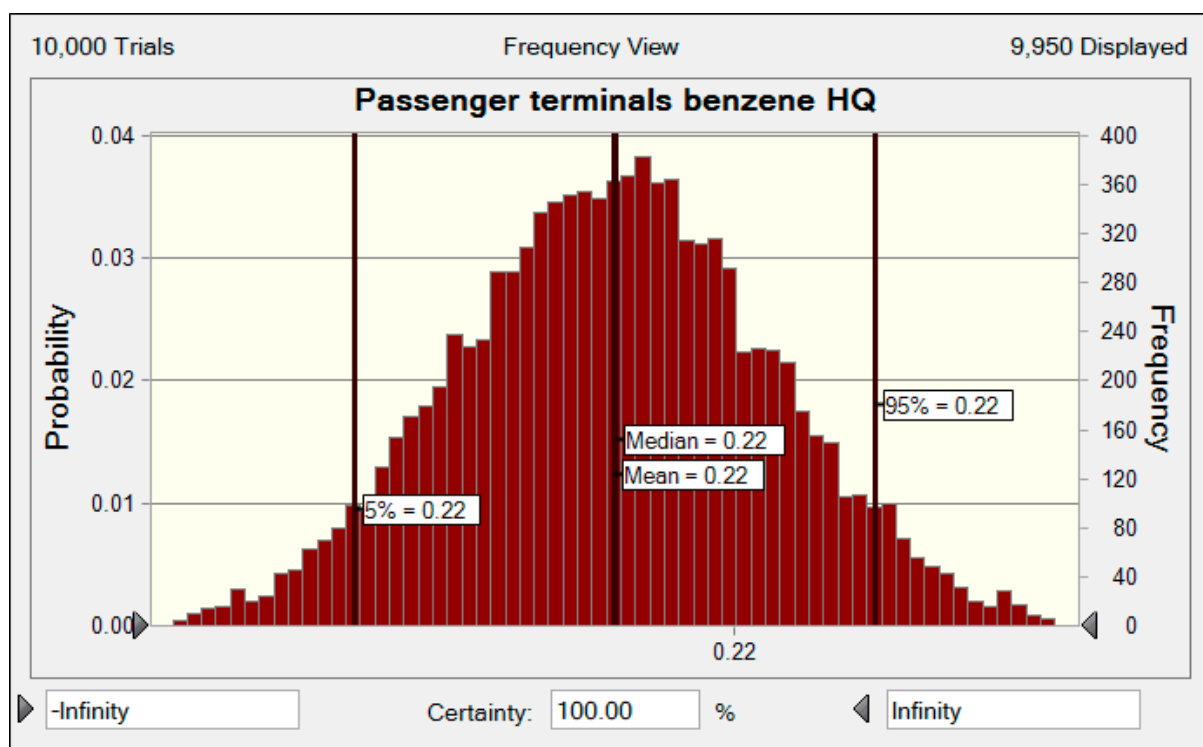

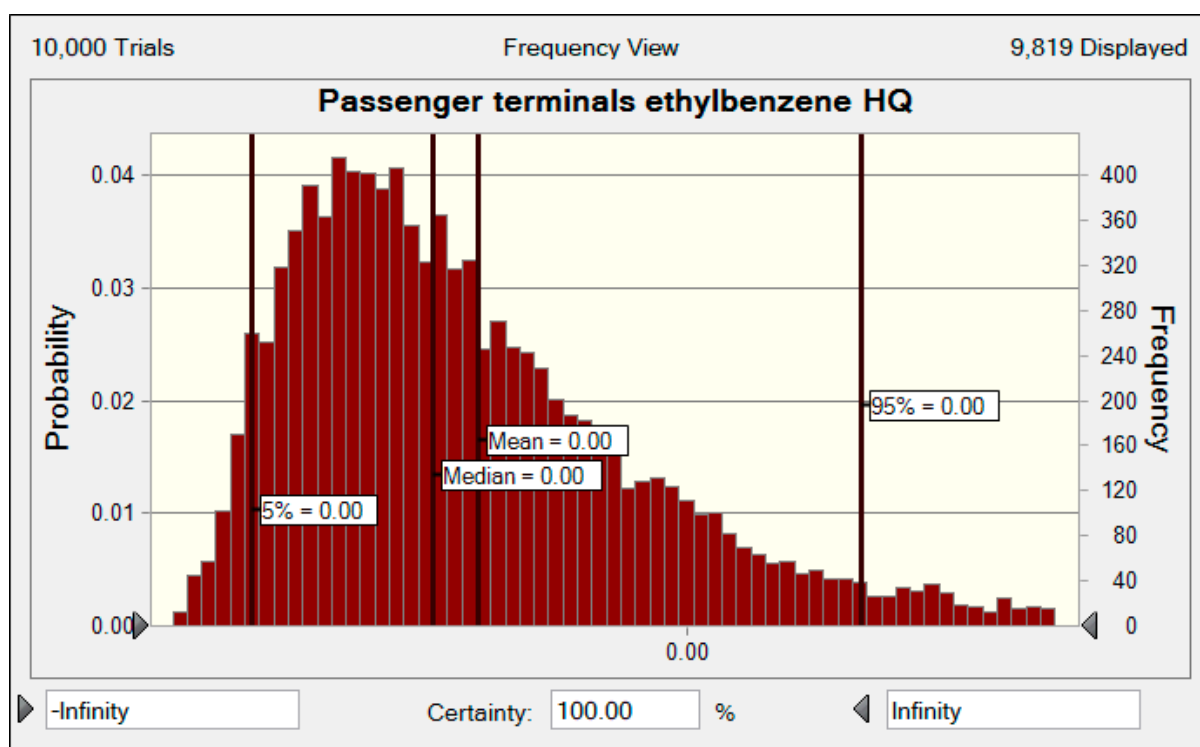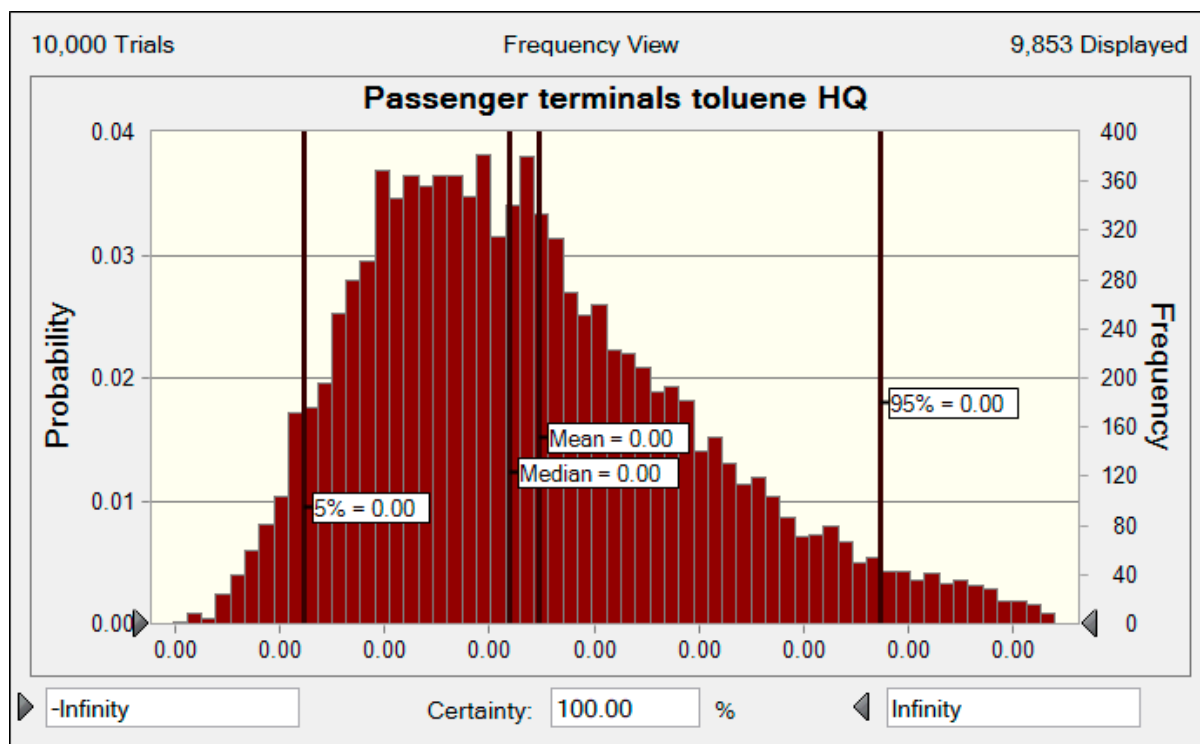

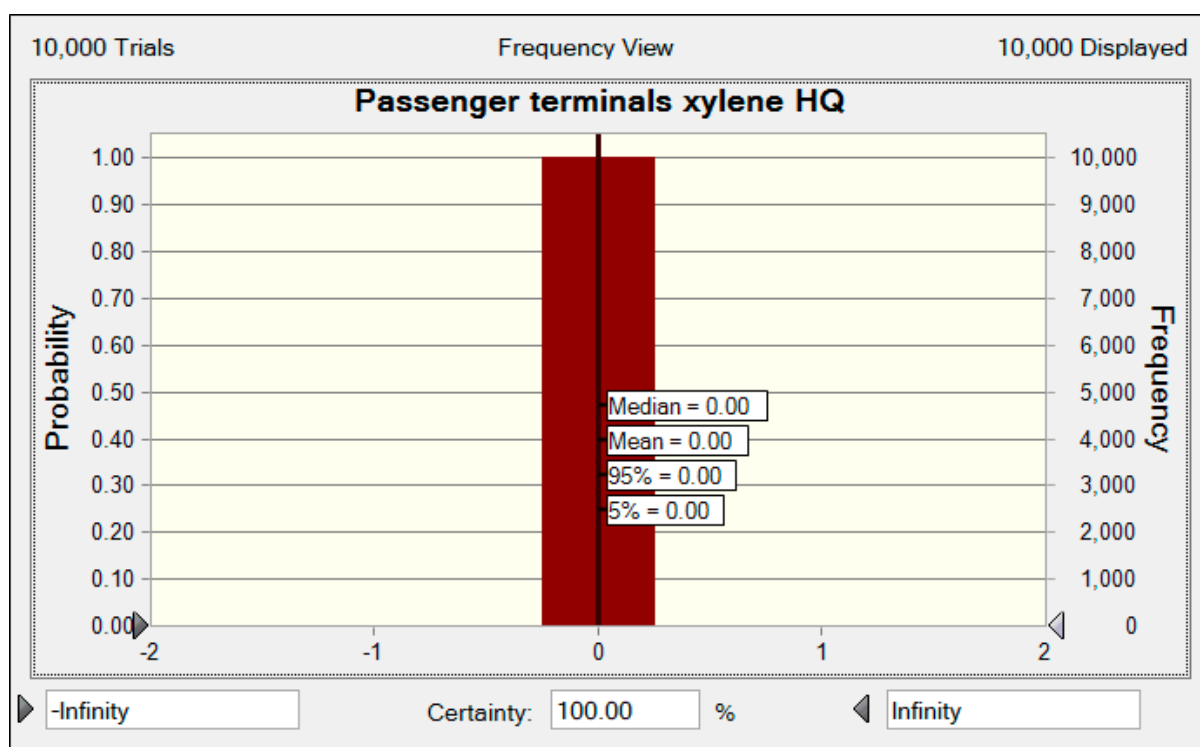

Figure S10. Probability distributions of BTEX cancer and non-cancer risk in passenger terminals.

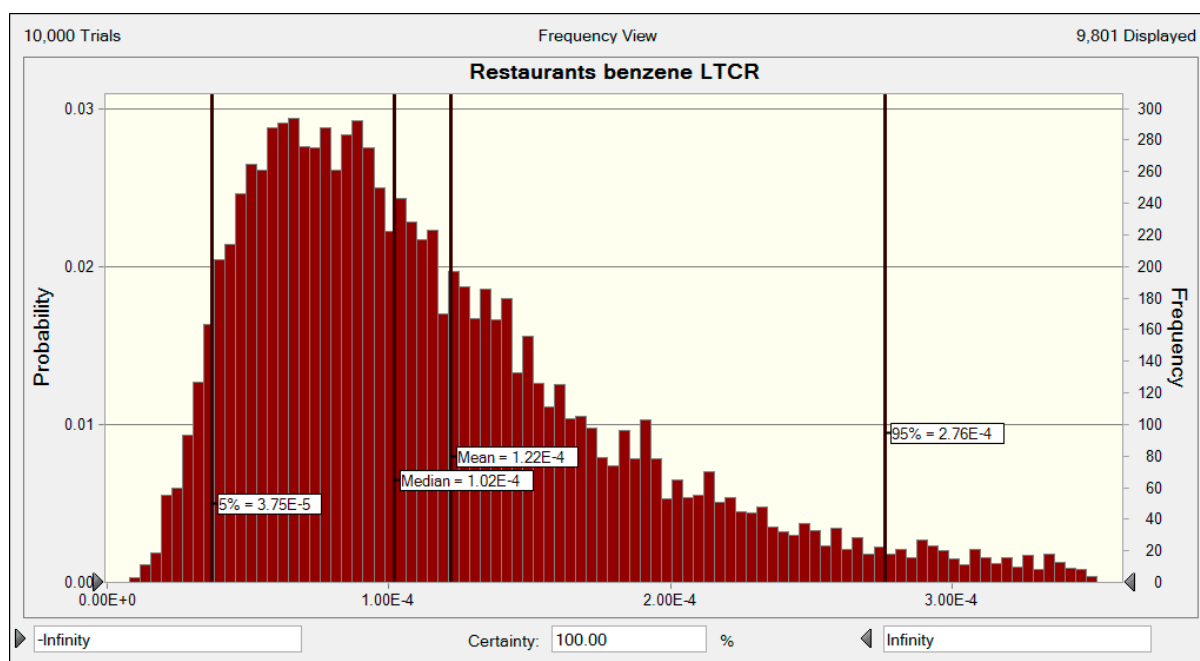

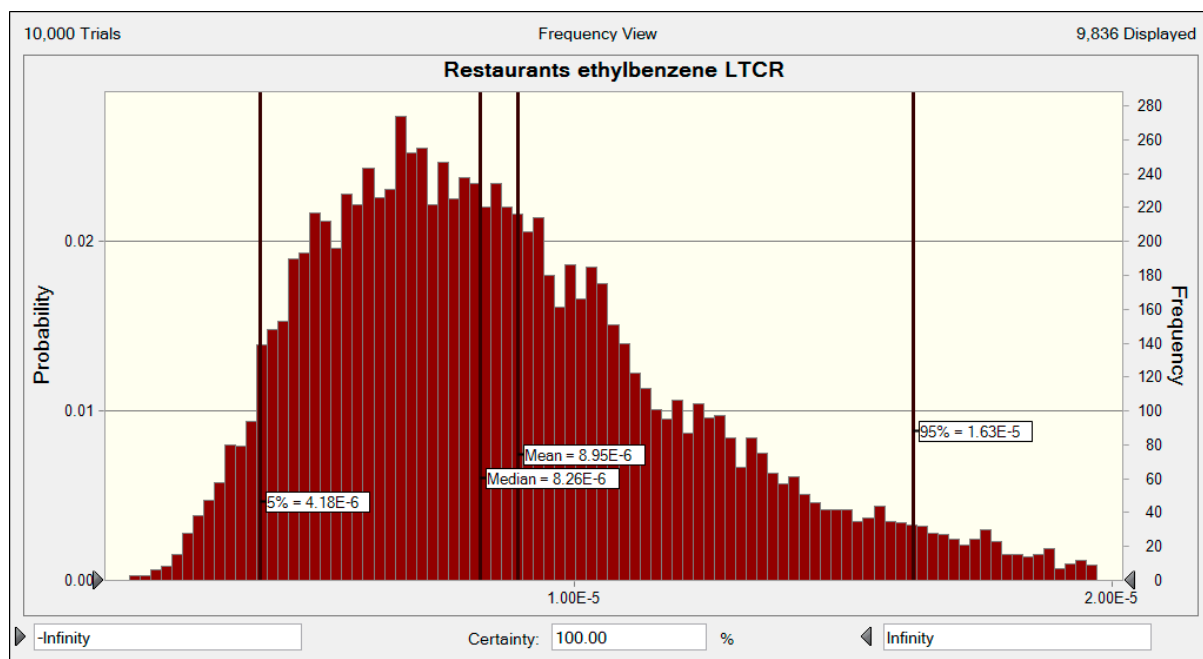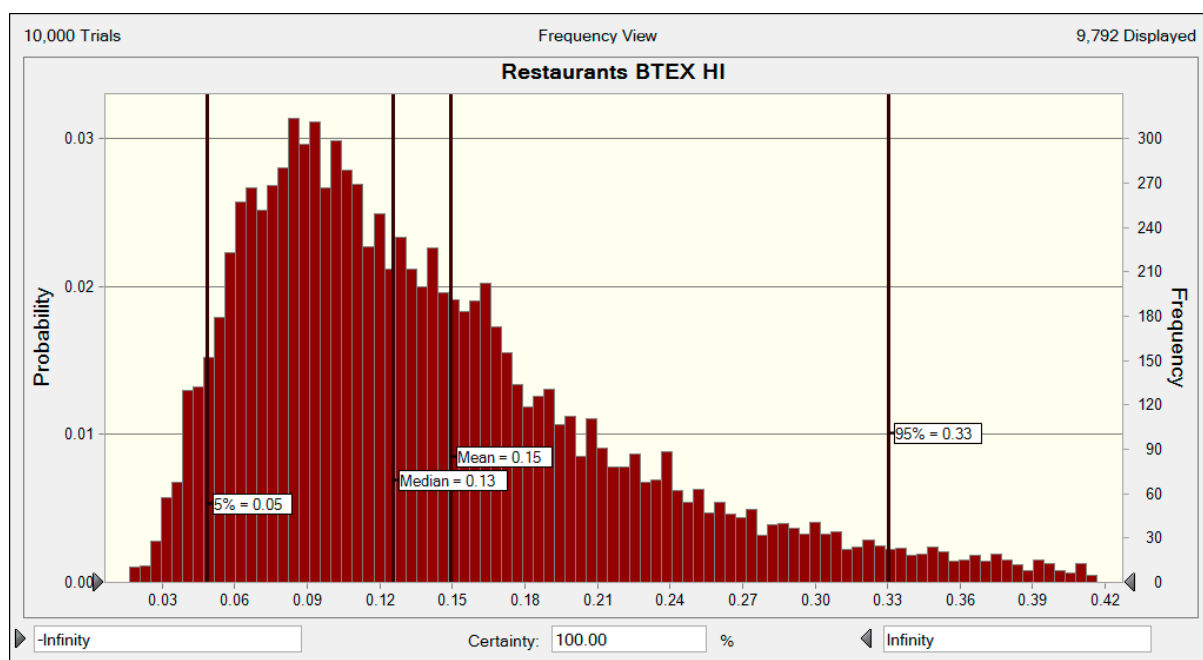

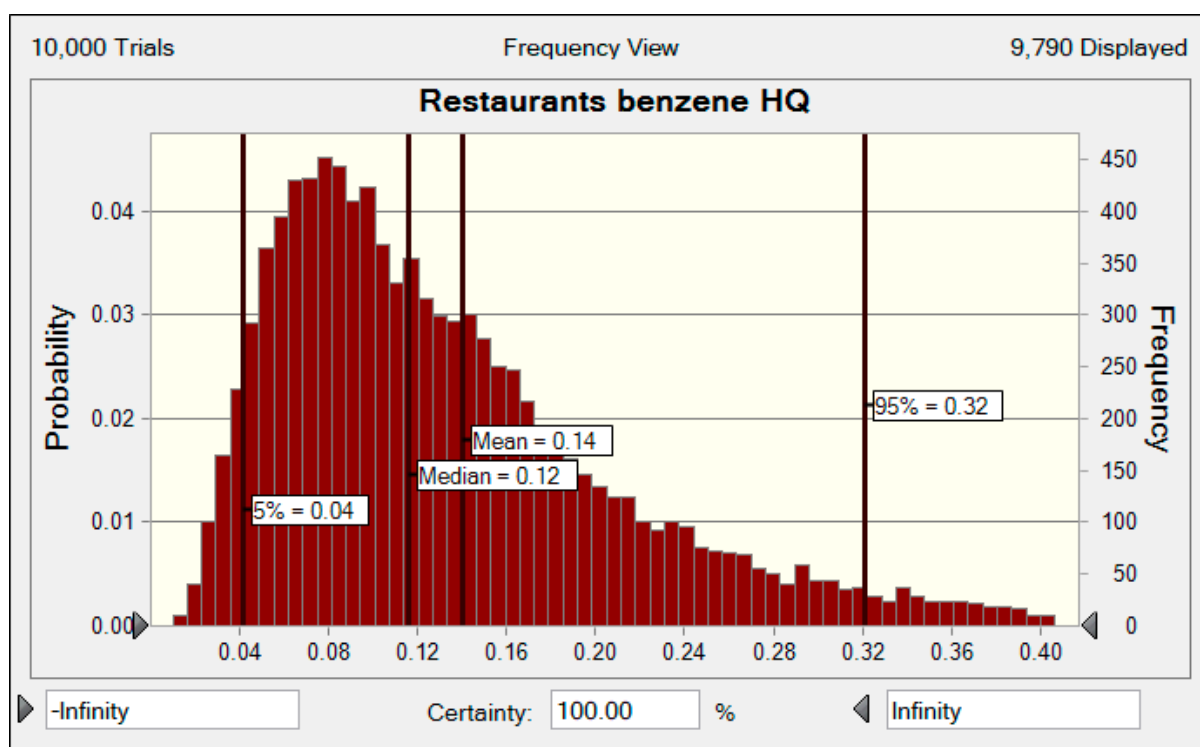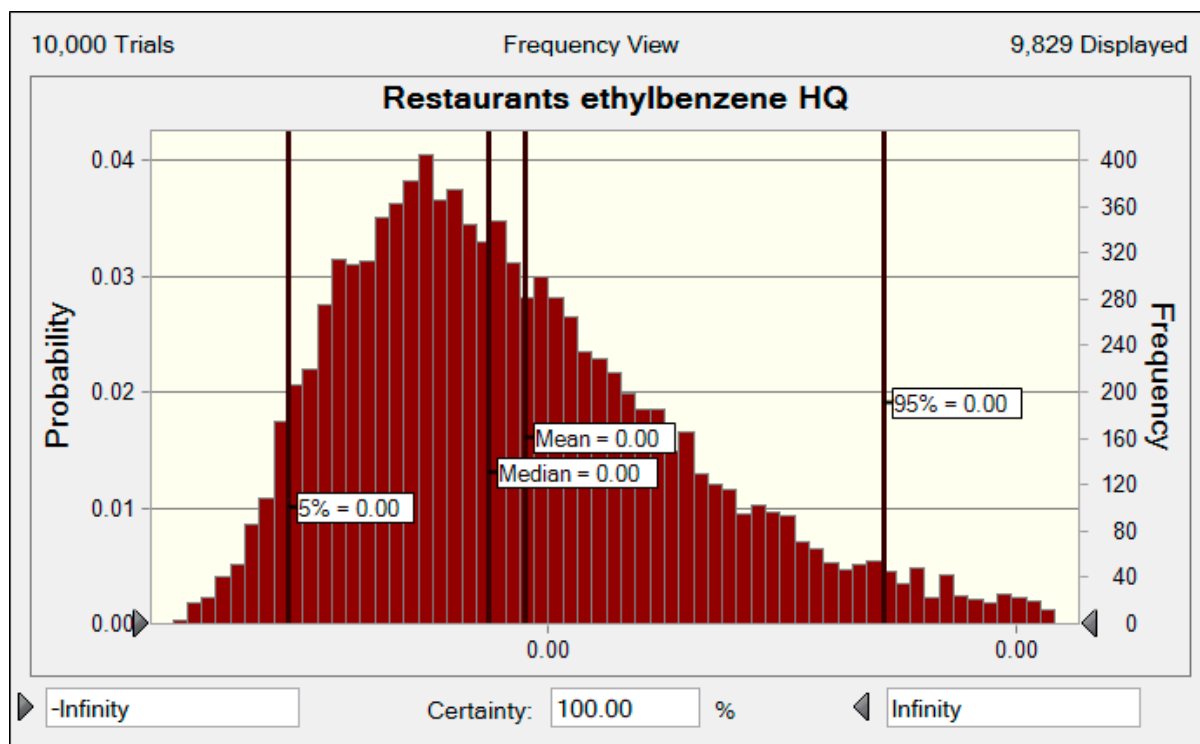

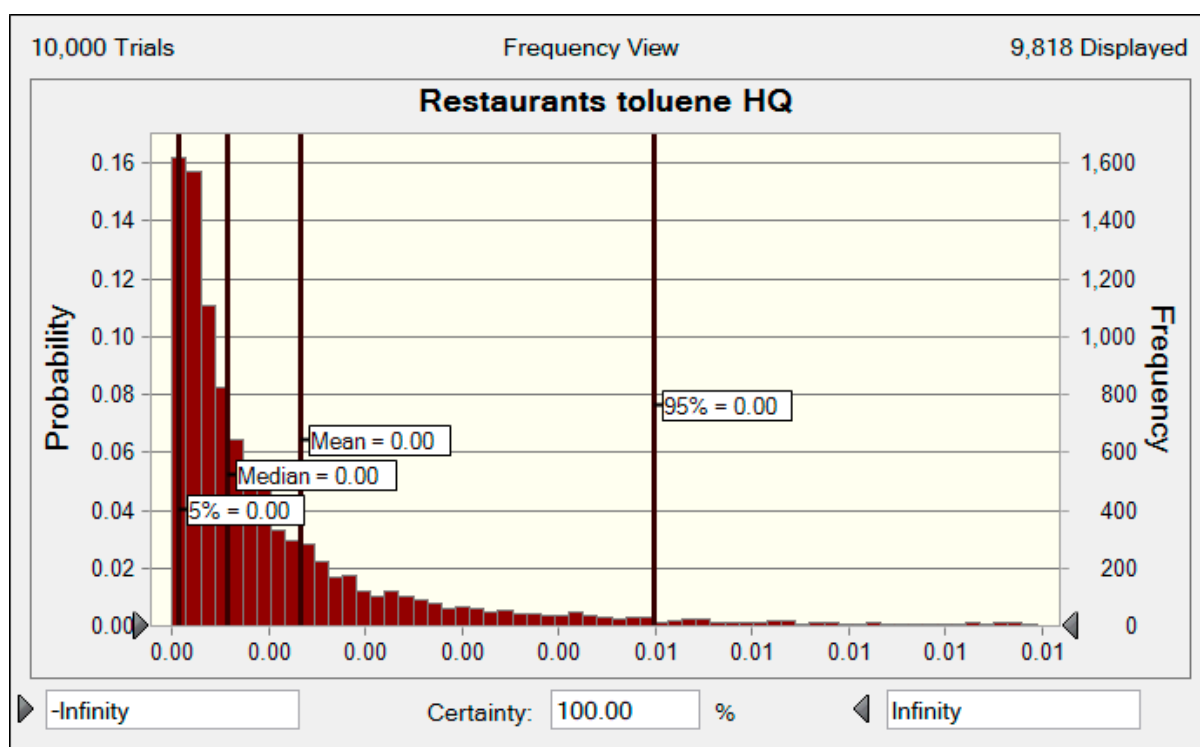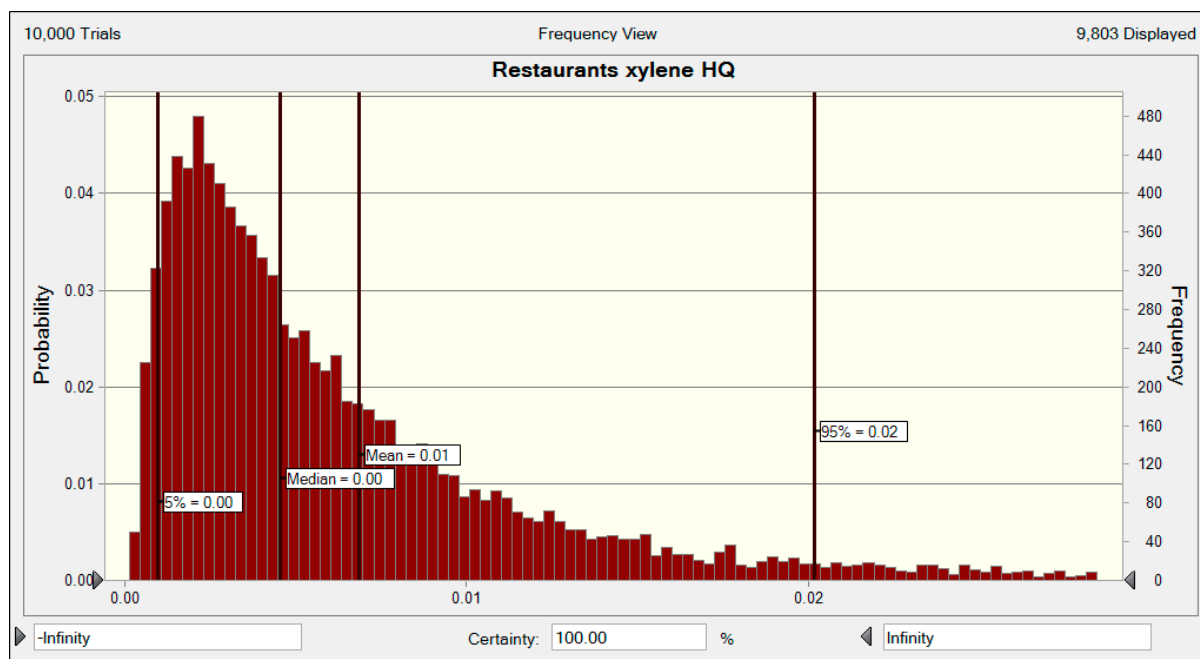

Figure S11. Probability distributions of BTEX cancer and non-cancer risk in restaurants.

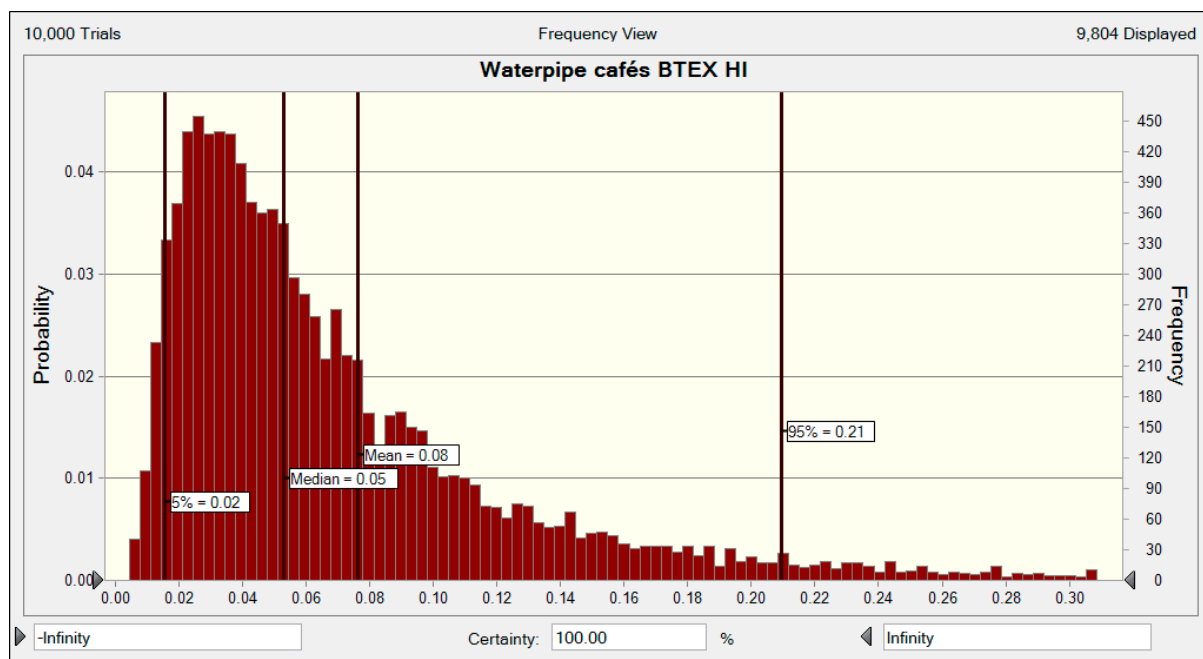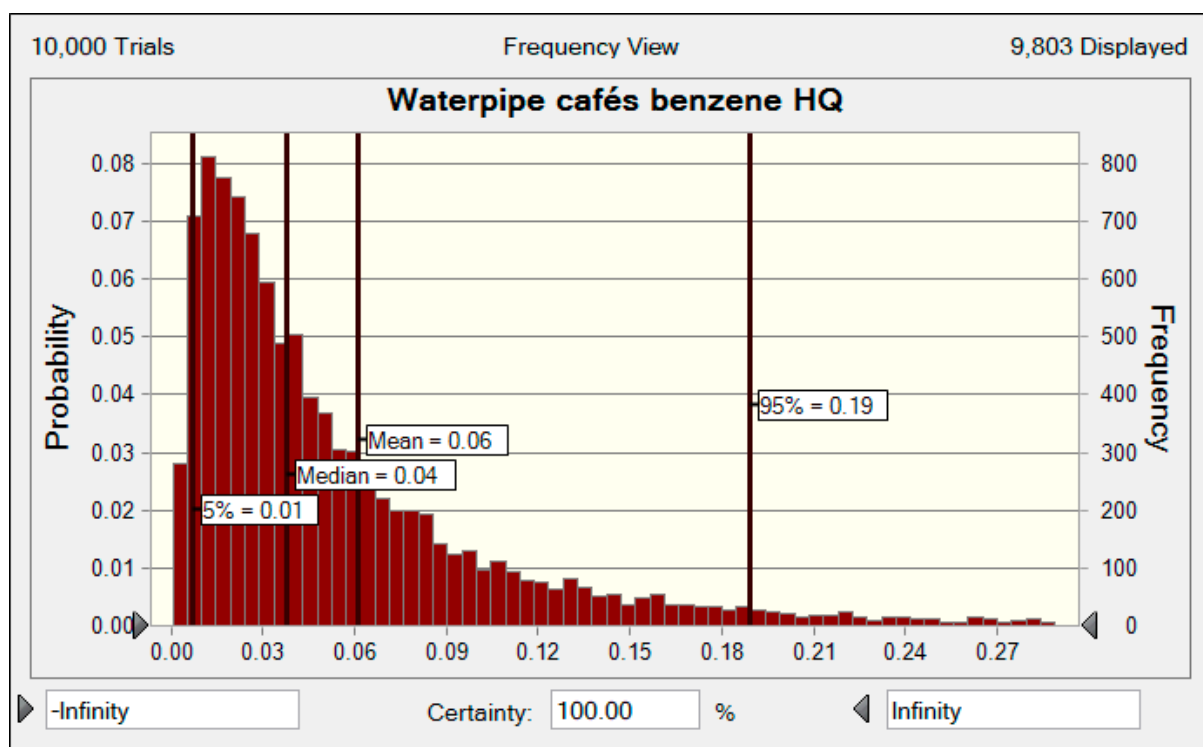



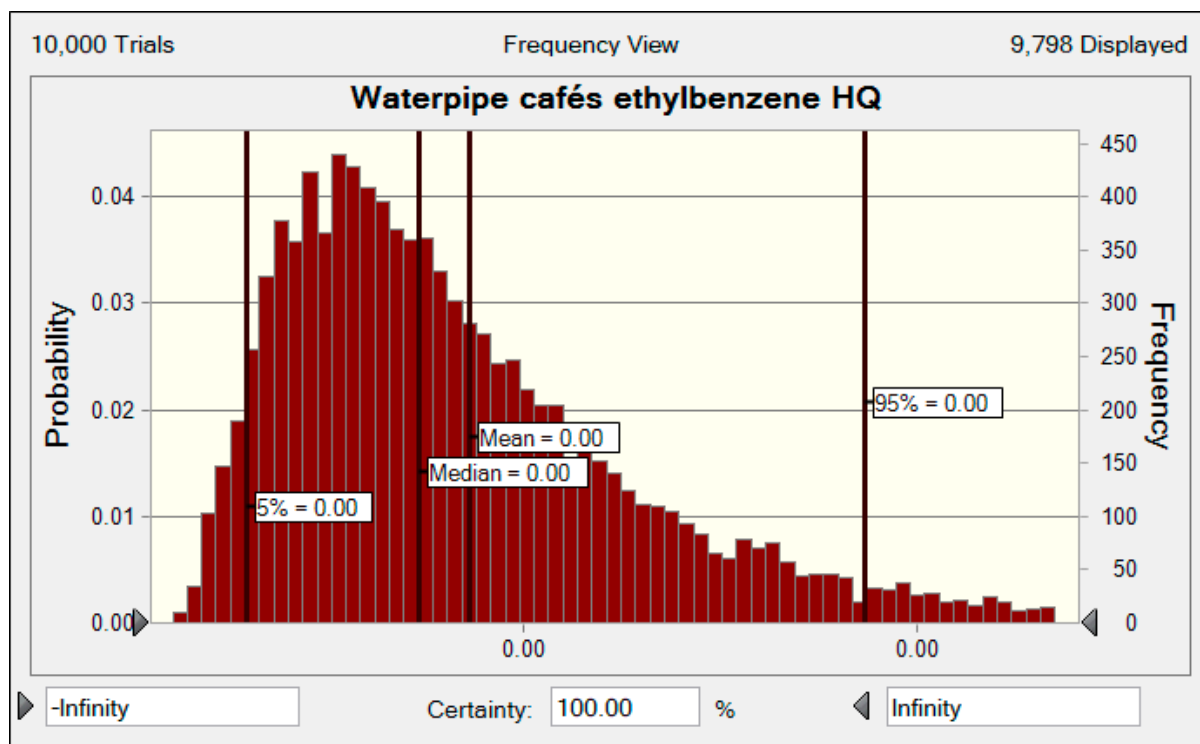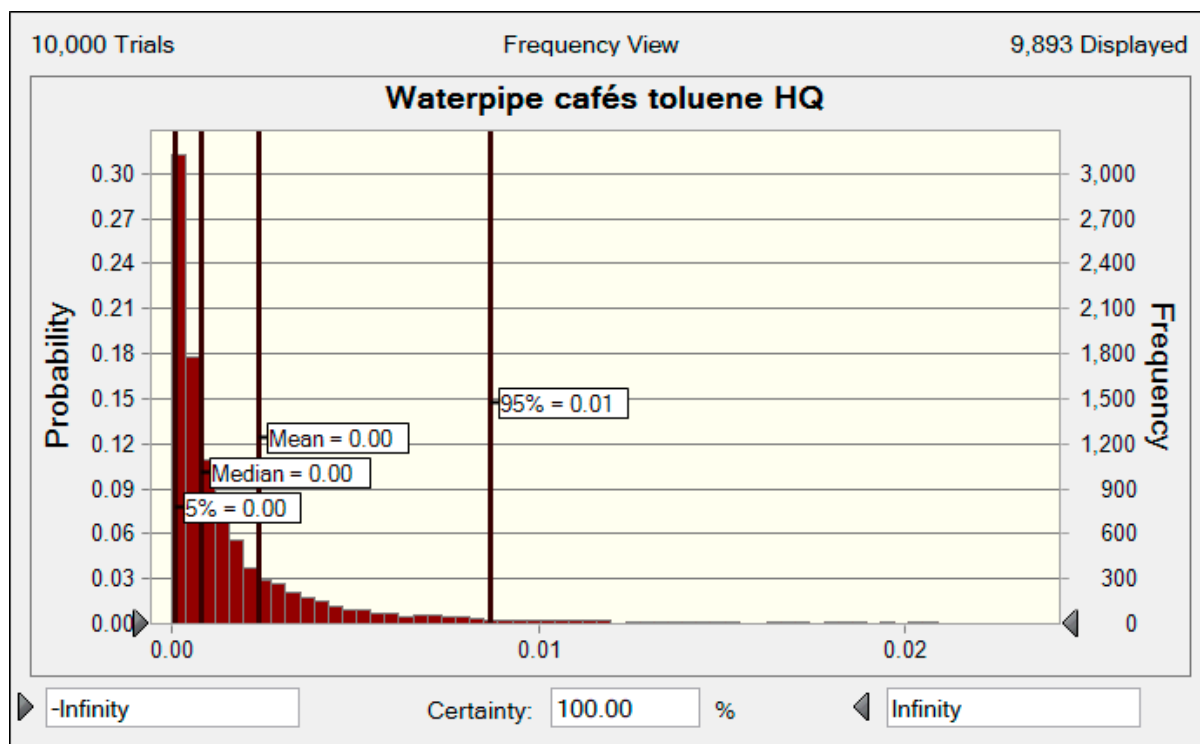

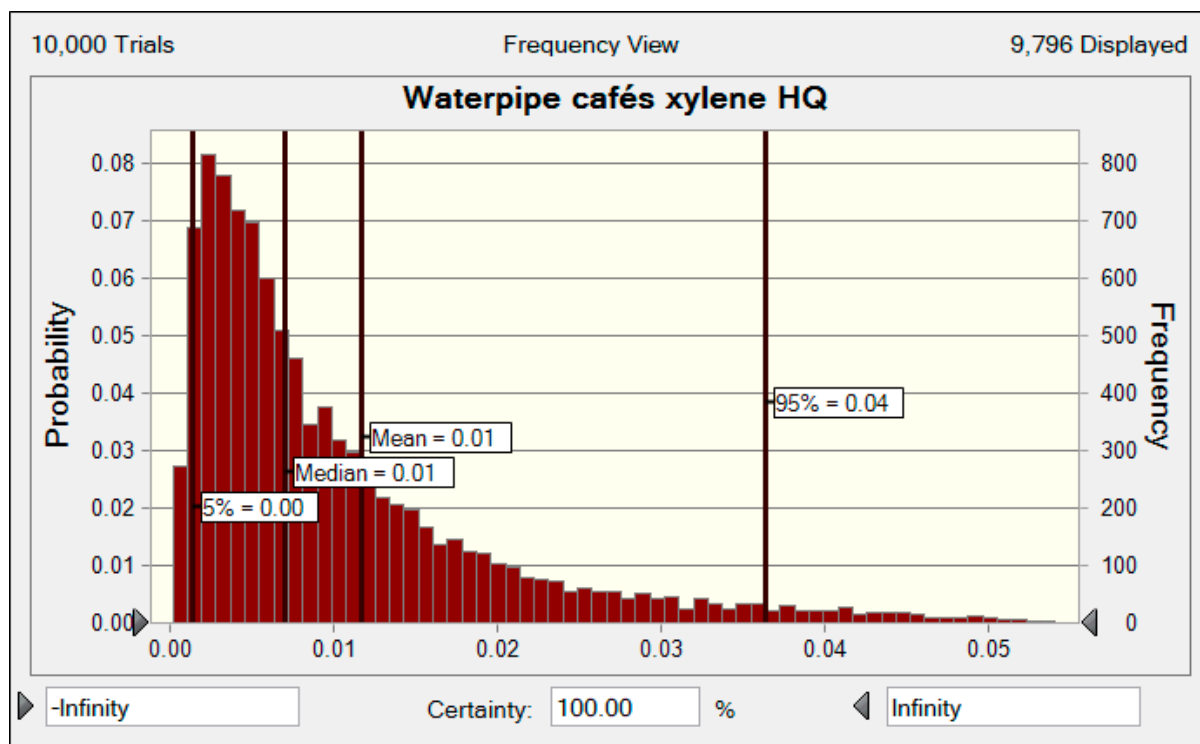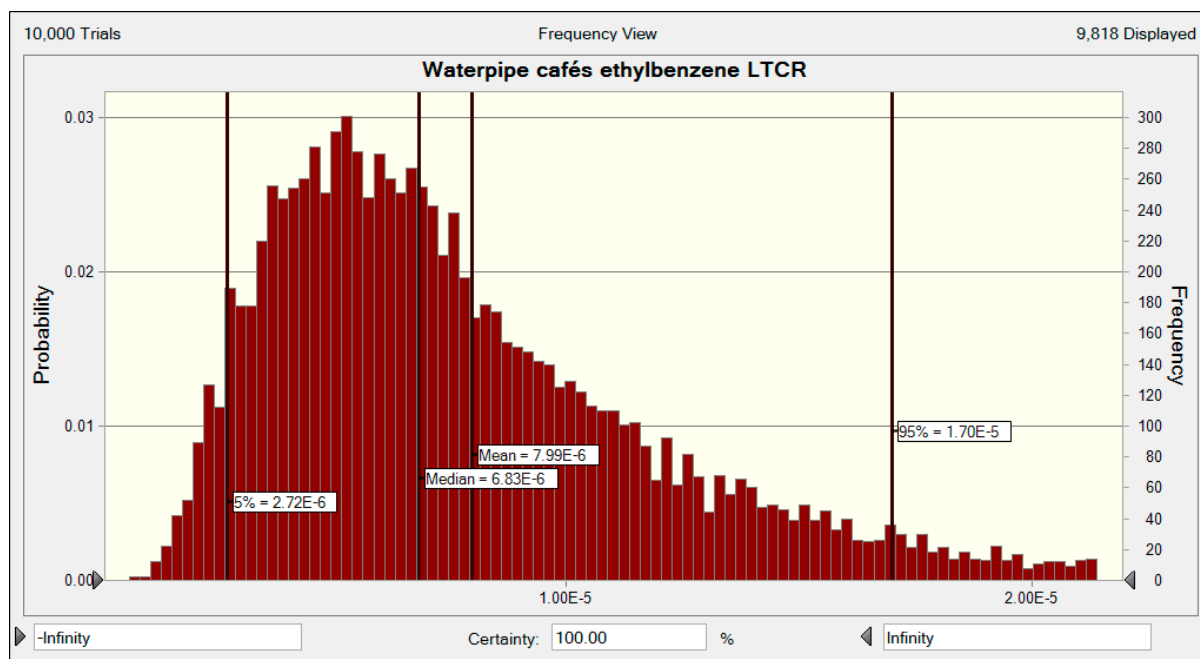

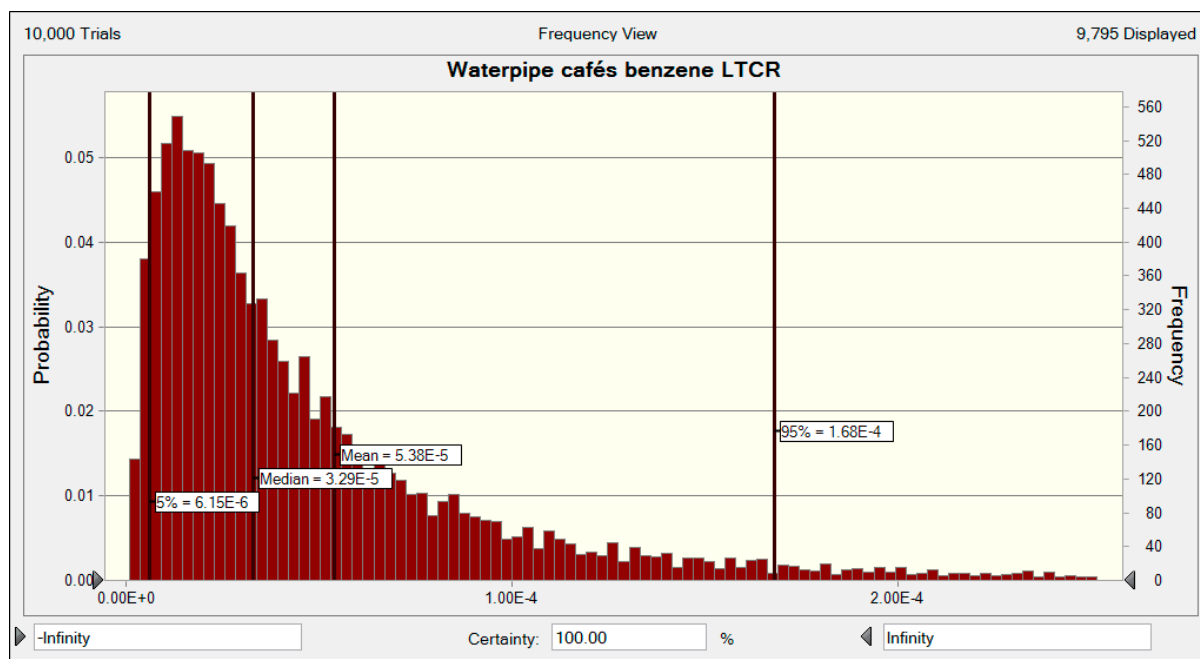

**Figure S12.** Probability distributions of BTEX cancer and non-cancer risk in waterpipe cafes.
